# Supplementary material for: Synthesis, Molecular Docking Study, and Biological Evaluation of New 4-(2,5-Dimethyl-1H-pyrrol-1-yl)-N’-(2-(substituted)acetyl)benzohydrazides as Dual Enoyl ACP Reductase and DHFR Enzyme Inhibitors
Source: MDPI journal article supplement (doi:10.3390/antibiotics12040763), 2023-04-16

SPECTRUM NO:01 (IR spectrum of Compound 5a)

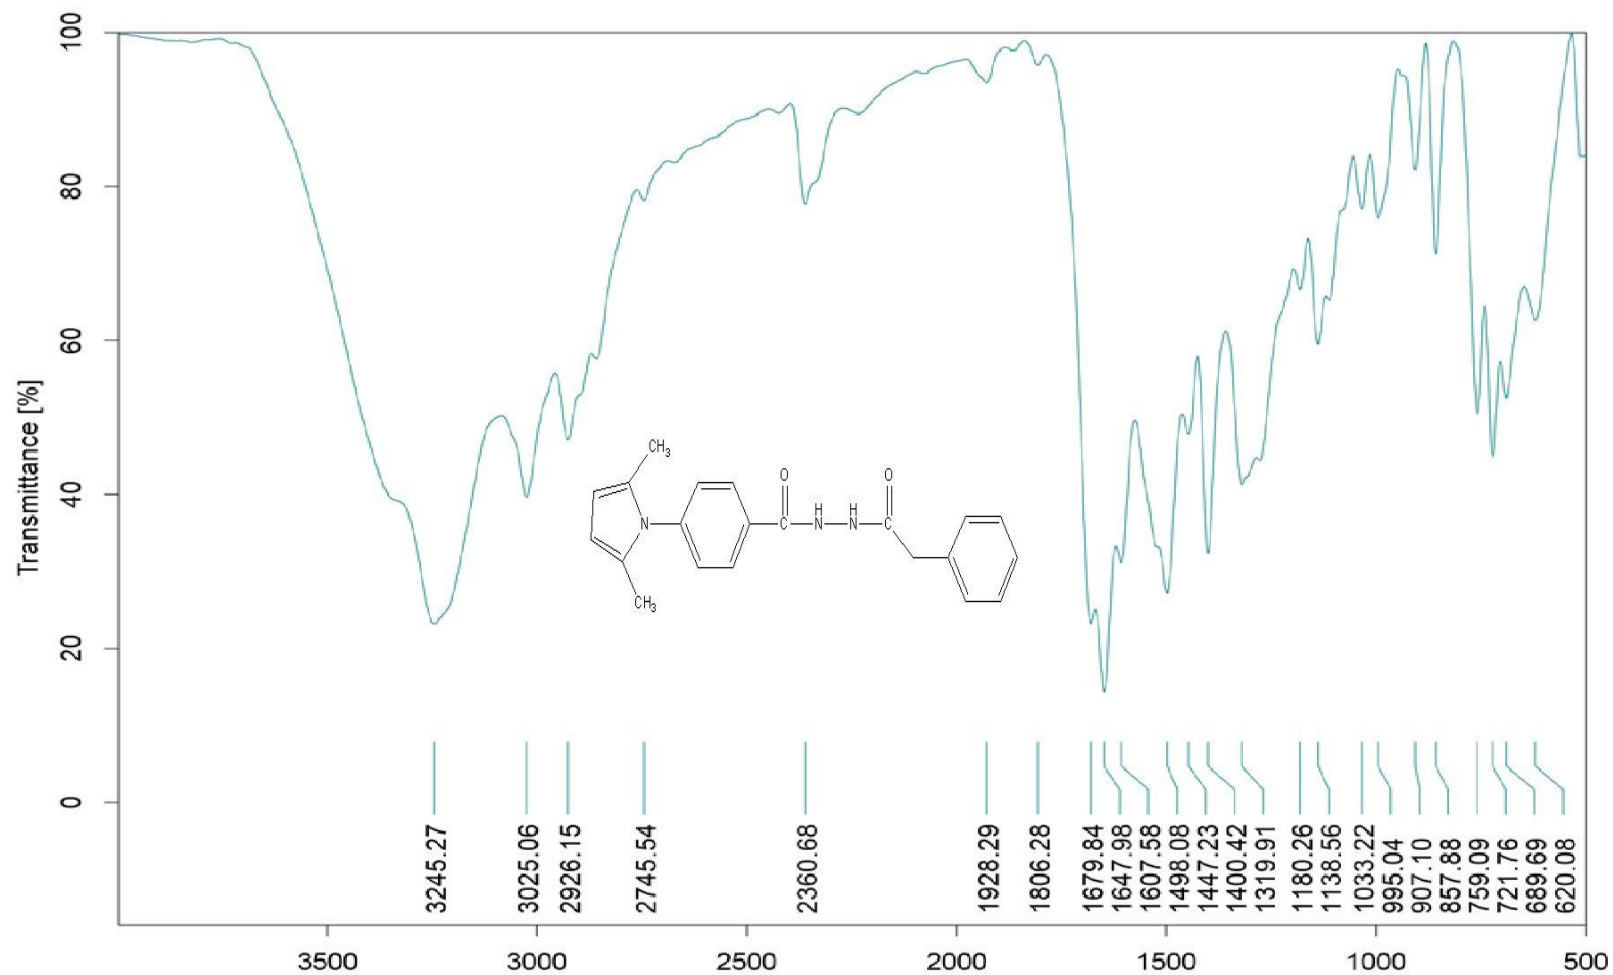

SPECTRUM NO :02 (<sup>1</sup>H NMR spectrum of Compound 5a)

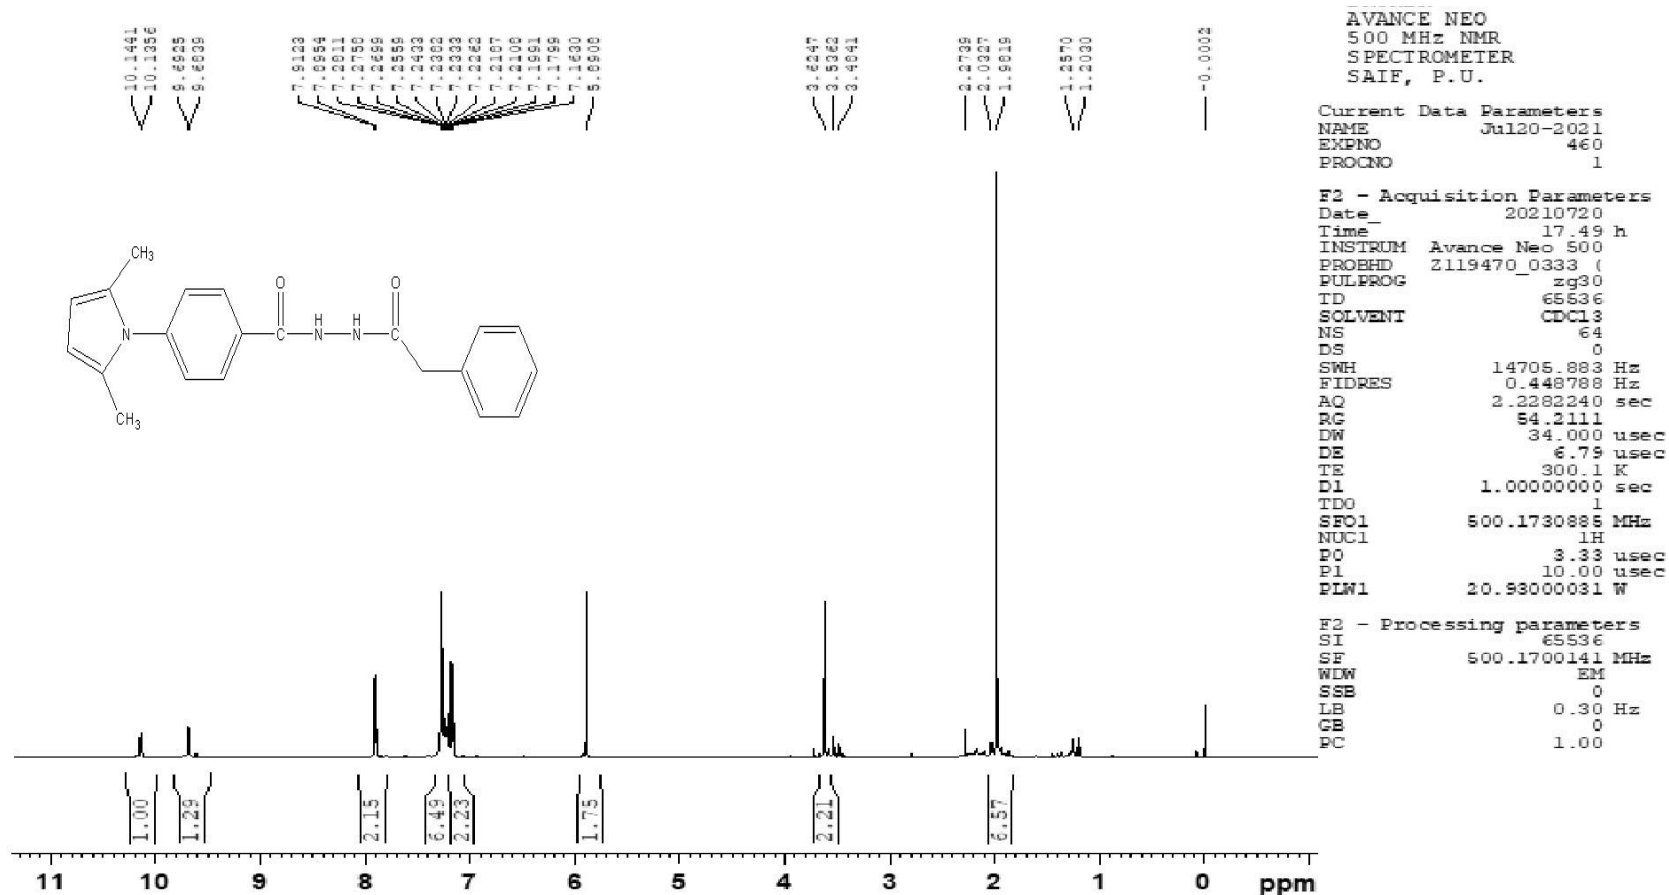

[illegible]

```
F2 - Processing parameters
SI          327.68
SF          125.7678488 MHz
WDW          EM
SSE          0
LB          1.00 Hz
GB          0
FPC          1.40
```

SPECTRUM NO:04 (Mass spectrum of Compound 5a)

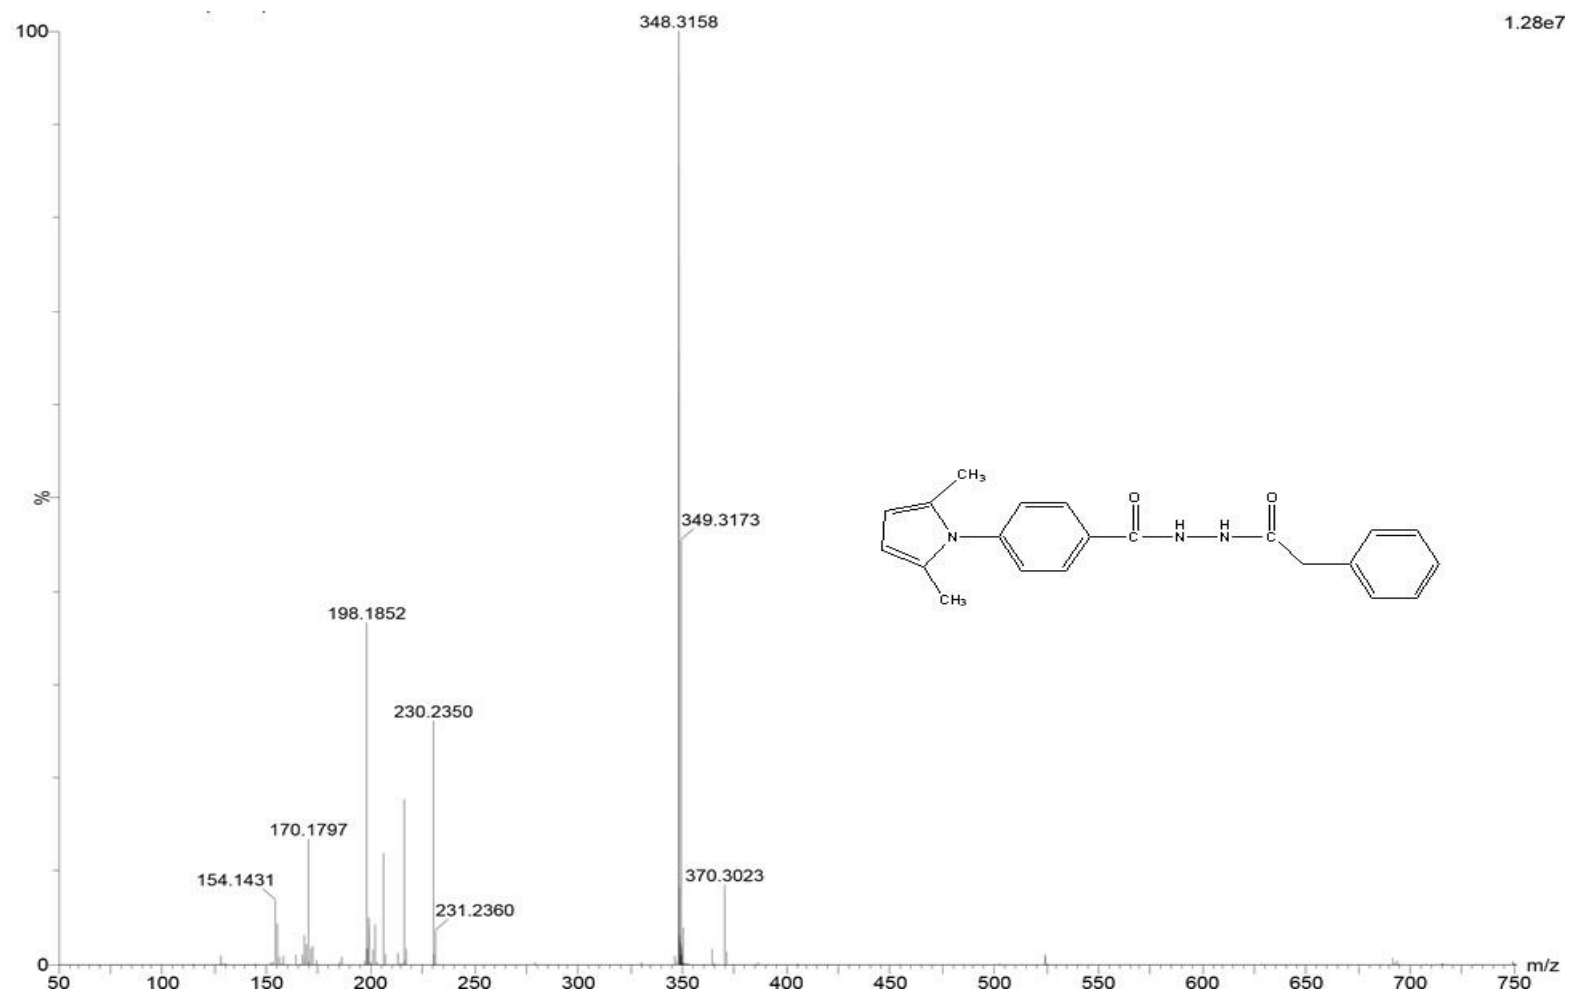

SPECTRUM NO:05 (IR spectrum of Compound 5b)

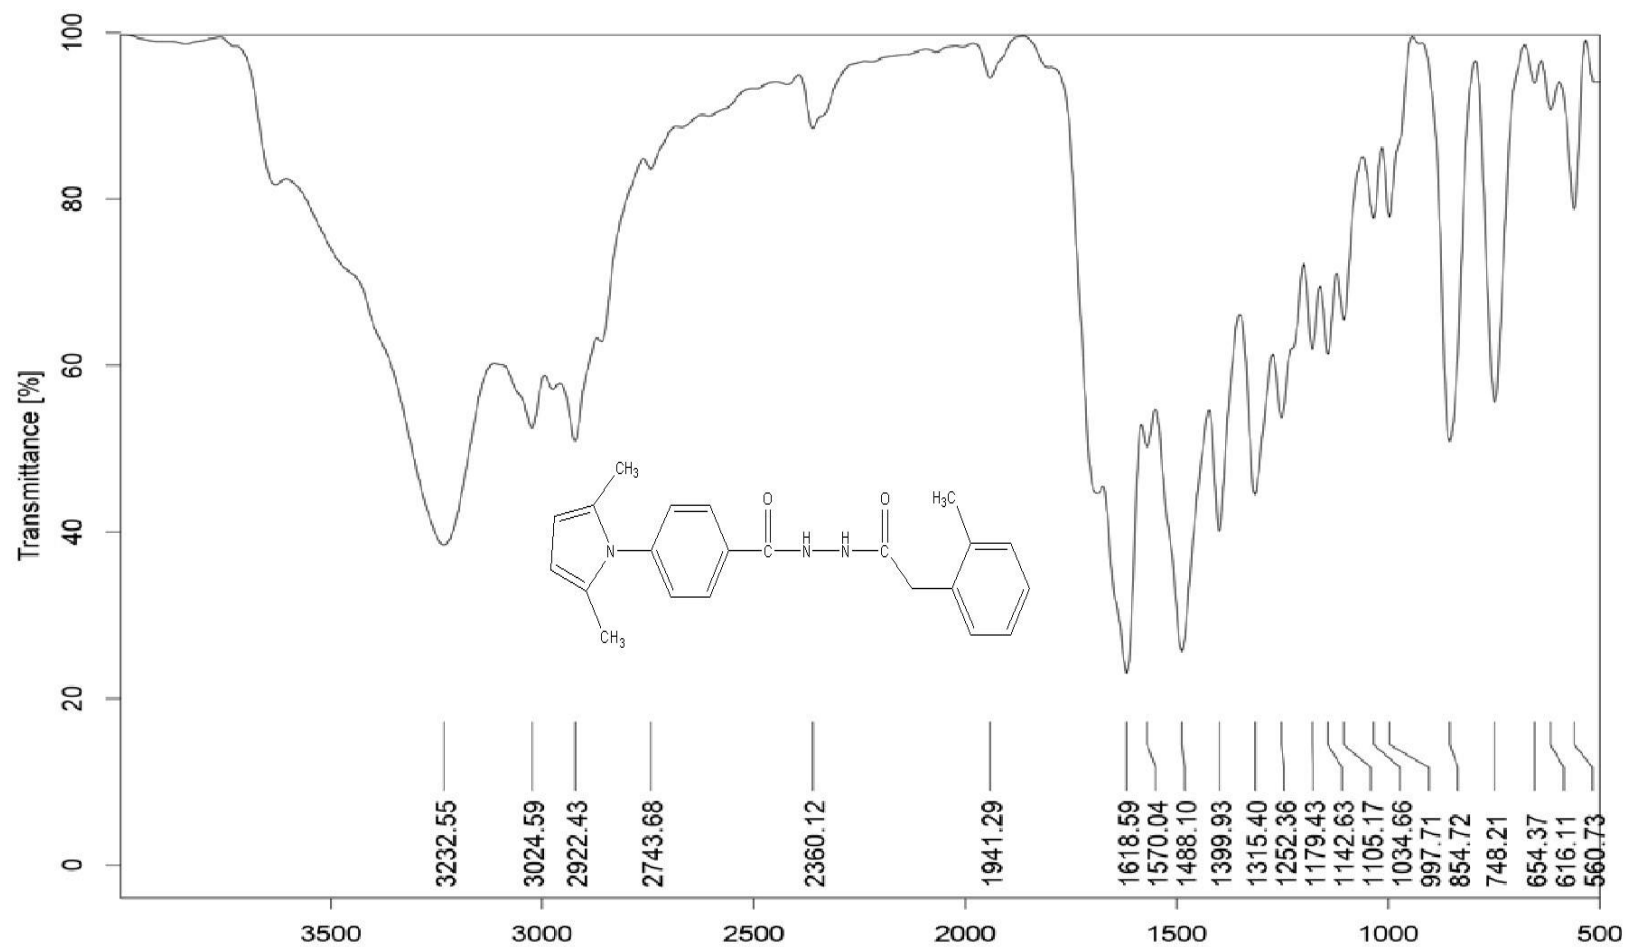

---

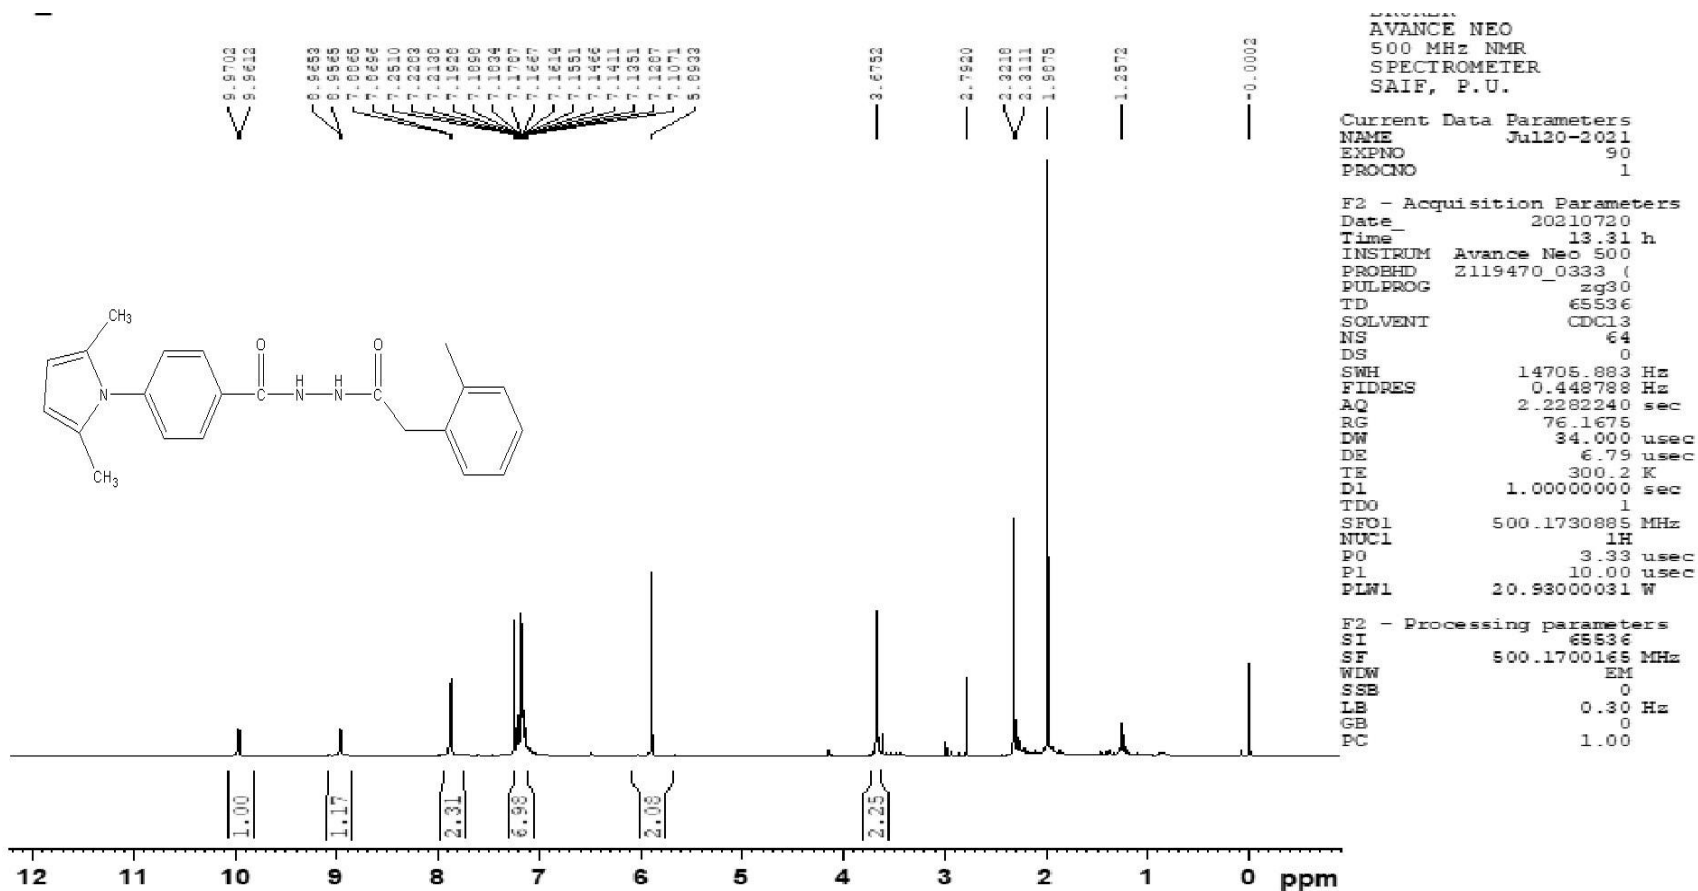

SPECTRUM NO:07 (<sup>13</sup>C NMR spectrum of Compound 5b)

4CH33c  
C13CPD CDCl3 {D:\Spectra} nmr 38

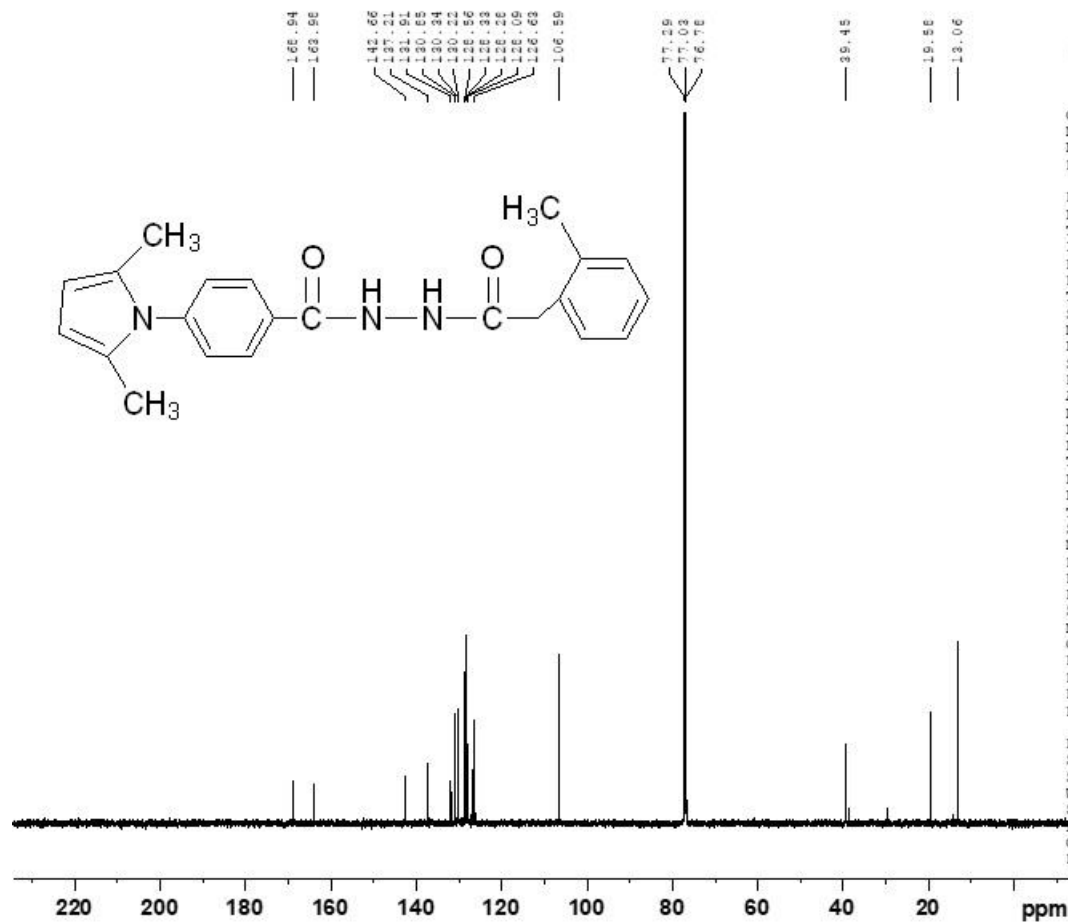

BRUKER  
AVANCE NEO  
500 MHz NMR SPECTROMETER  
SAIF, PANJAB UNIVERSITY,  
CHANDIGARH

Current Data Parameters

NAME Mar02-2023  
EXPNO 381  
PROCNO 1

F2 - Acquisition Parameters

Date\_ 20230302  
Time 20.55 h  
INSTRUM Avance Neo 500  
PROBHD Z119470\_0332 (   
PULPROG zgpg30  
TD 65536  
SOLVENT CDCl3  
NS 512  
DS 4  
SWH 37037.035 Hz  
FIDRES 1.130281 Hz  
AQ 0.8847360 sec  
RG 101  
DW 13.500 usec  
DE 6.50 usec  
TE 300.1 K  
D1 2.00000000 sec  
D11 0.03000000 sec  
TD0 1  
SFO1 125.7804222 MHz  
NUC1 13C  
F0 3.32 usec  
F1 10.00 usec  
PLW1 83.14099884 W  
SFO2 500.1720007 MHz  
NUC2 1H  
CPDPRG2 waltz65  
PCPD2 80.00 usec  
PLW2 20.92000031 W  
PLW12 0.32703000 W  
PLW13 0.16449000 W

F2 - Processing parameters

SI 32768  
SF 125.7678465 MHz  
WDW EM  
SSB 0  
LB 1.00 Hz  
GB 0  
PC 1.40

SPECTRUM NO:08 (Mass spectrum of Compound 5b)

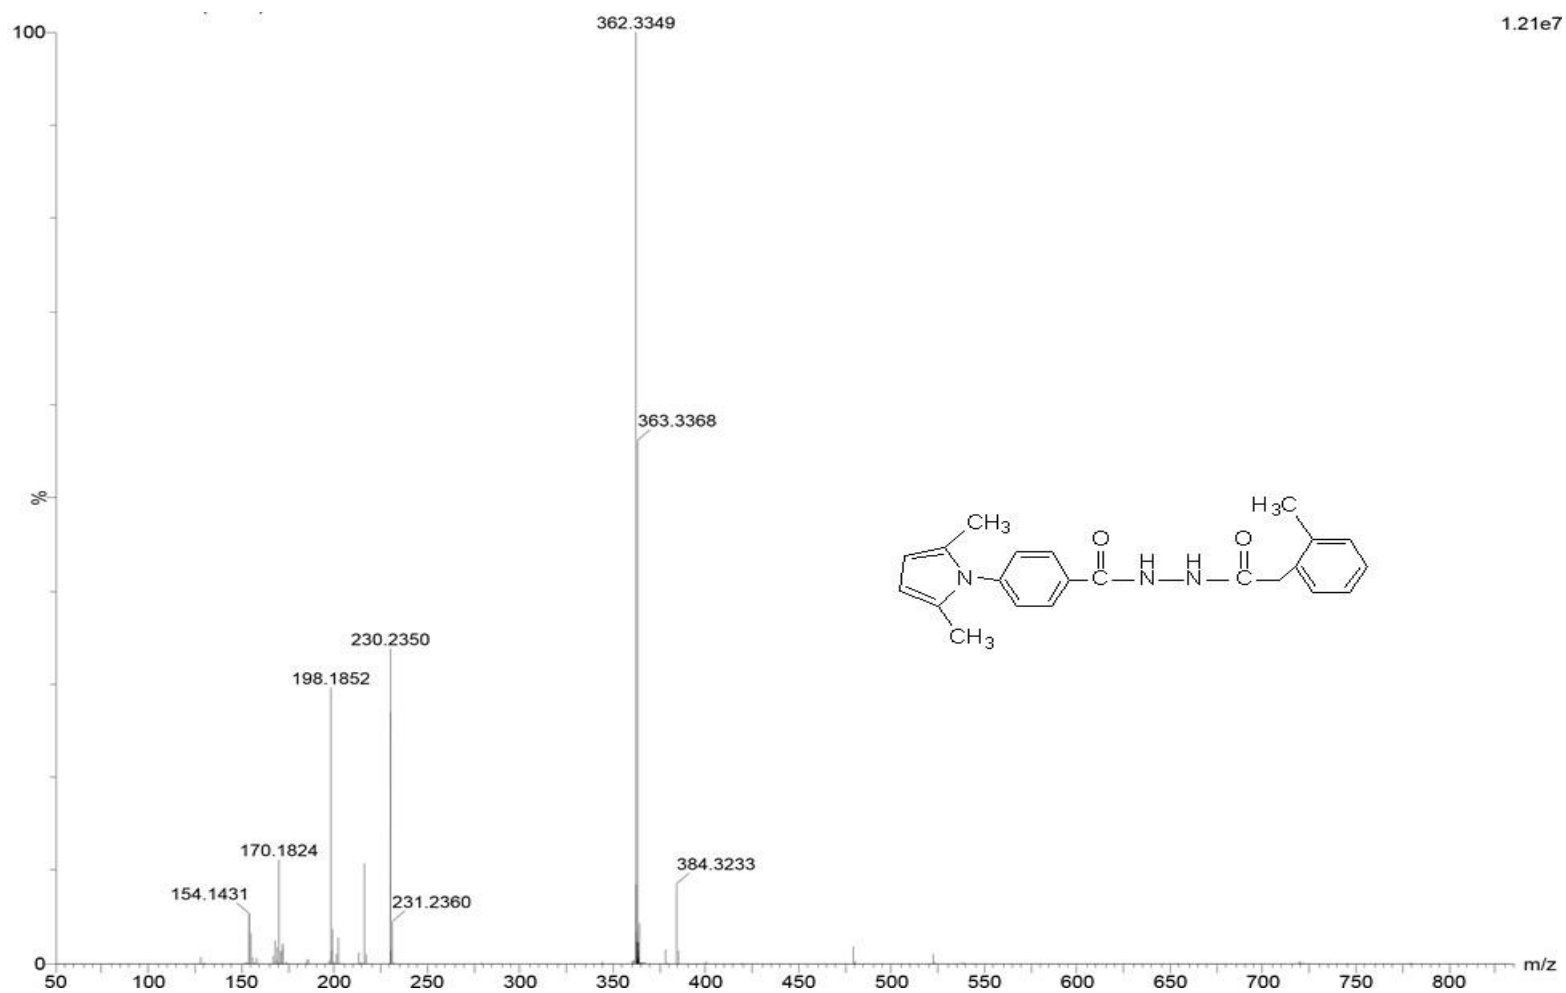



SPECTRUM NO :09 (IR spectrum of Compound 5c)

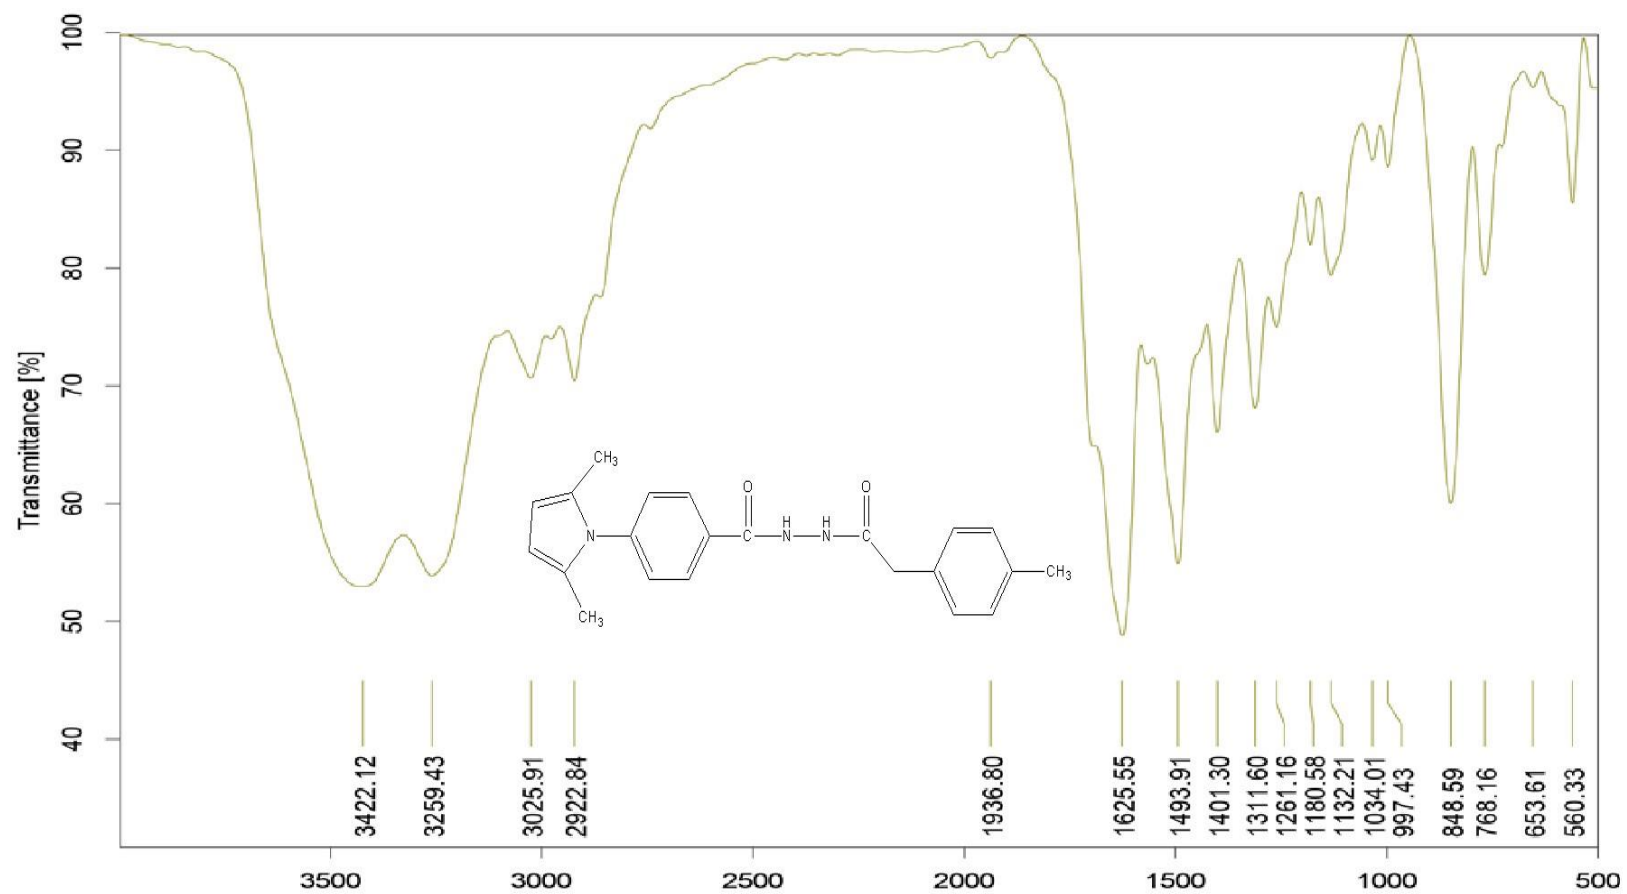

SPECTRUM NO:10 (<sup>1</sup>H NMR spectrum of Compound 5c)

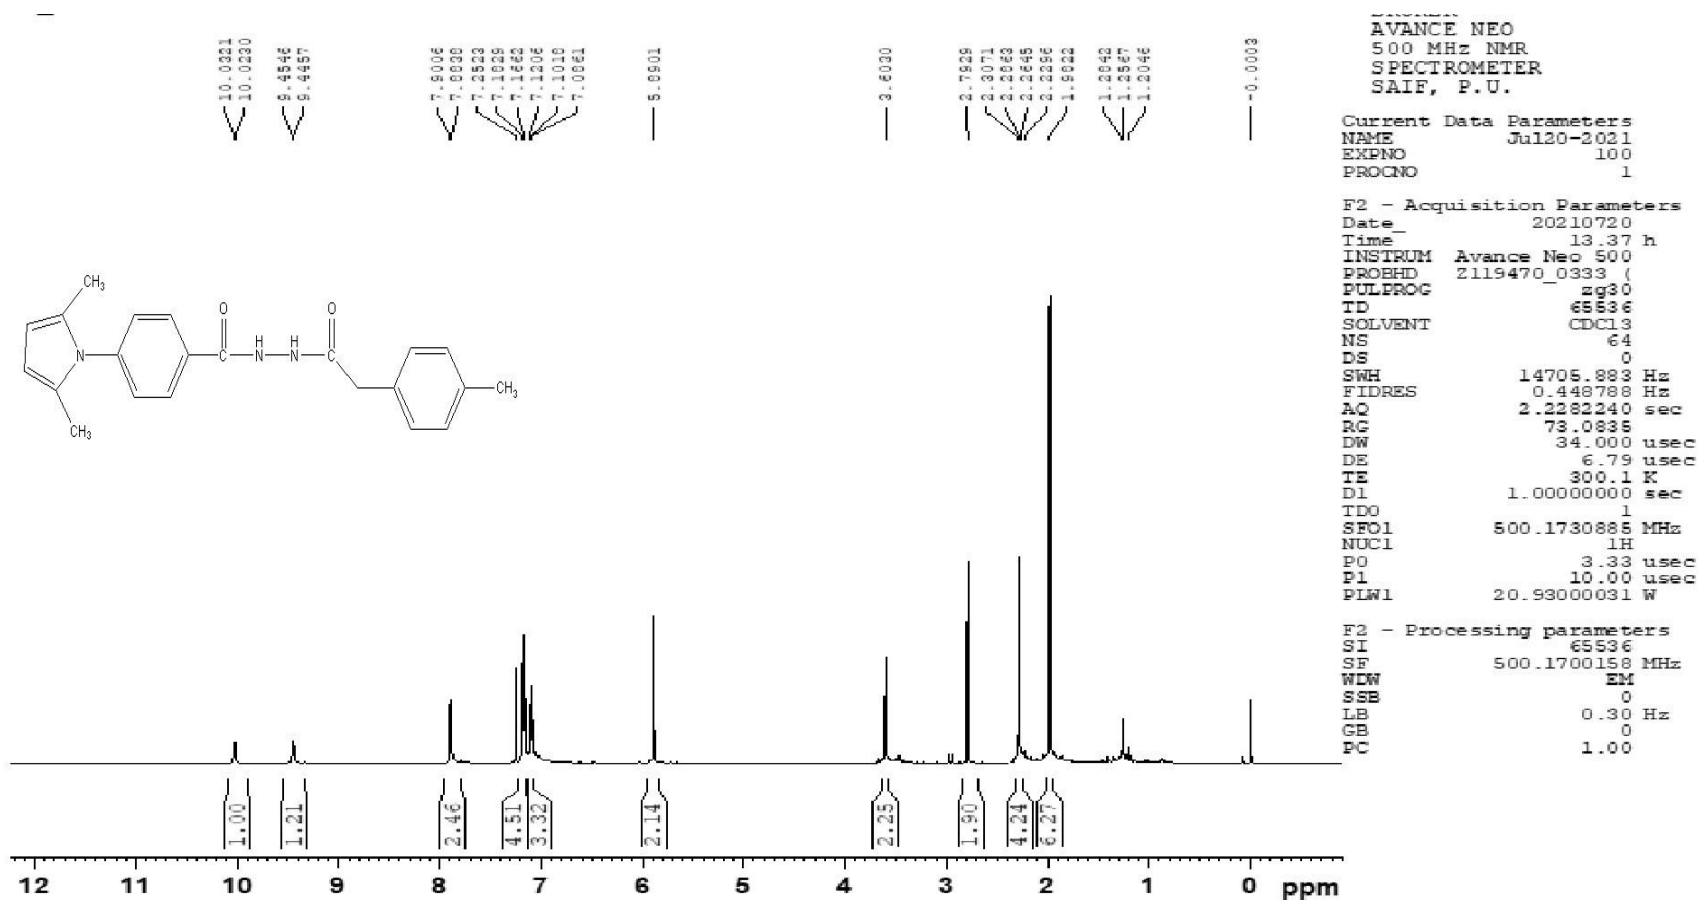

SPECTRUM NO:11 ( $^{13}\text{C}$  NMR spectrum of Compound 5c)

4CH33c  
C13CPD CDC13 {D:\Spectra} nmr 37

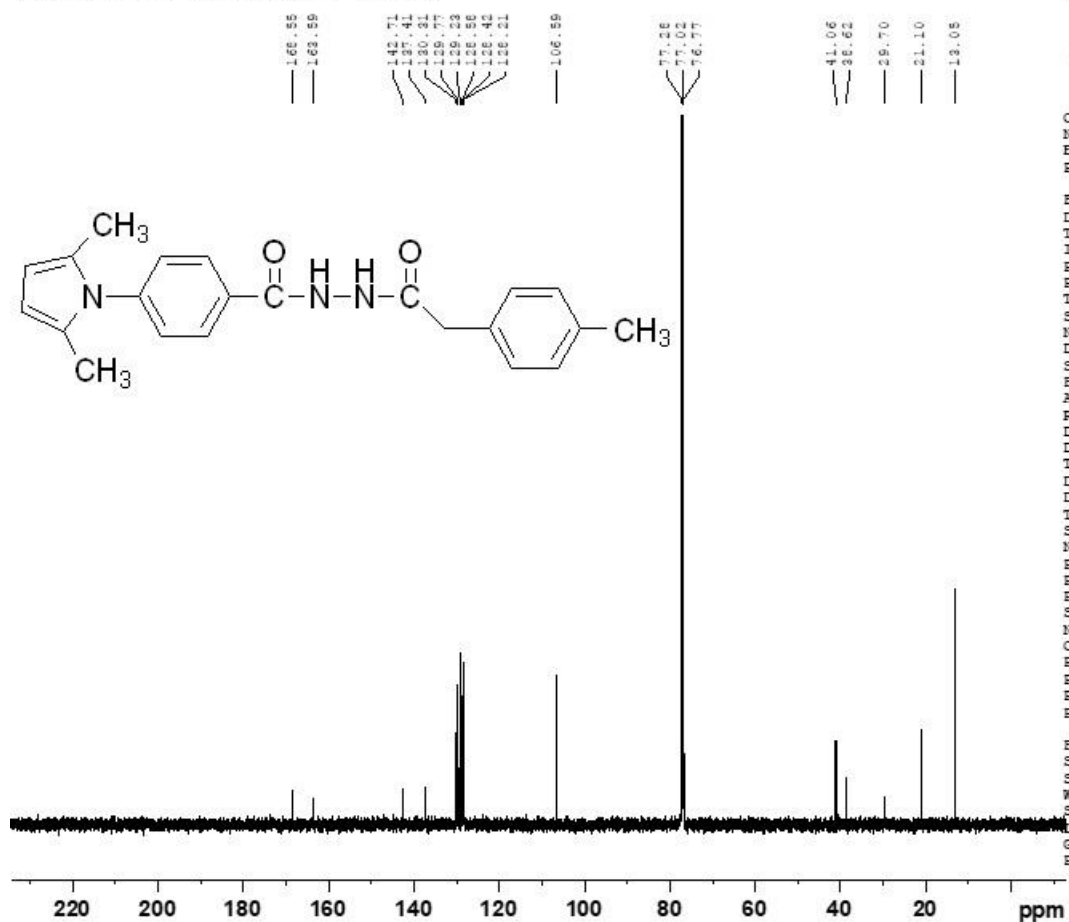

BRUKER  
AVANCE NEO  
500 MHz NMR SPECTROMETER  
SAIF, PANJAB UNIVERSITY,  
CHANDIGARH

Current Data Parameters  
NAME Mar02-2023  
EXPNO 371  
PROCNO 1

F2 - Acquisition Parameters  
Date\_ 20230302  
Time\_ 20.28 h  
INSTRUM Avance Neo 500  
PROBHD Z119470\_0323 (   
PULPROG zgpg30  
TD 65536  
SOLVENT CDCl3  
NS 512  
DS 4  
SWH 37037.035 Hz  
FIDRES 1.130281 Hz  
AQ 0.8847360 sec  
RG 101  
DW 13.500 usec  
DE 6.50 usec  
TE 300.2 K  
D1 2.00000000 sec  
D11 0.03000000 sec  
TD0 1  
SFO1 125.7804233 MHz  
NUC1 13C  
P0 3.23 usec  
P1 10.00 usec  
PLW1 83.14099884 W  
SFO2 500.1720007 MHz  
NUC2 1H  
CPDPRG2 waltz65  
PCPD2 80.00 usec  
PLW2 20.92000031 W  
PLW12 0.32703000 W  
PLW13 0.16449000 W

F2 - Processing parameters  
SI 32768  
SF 125.7678465 MHz  
WDW EM  
SSB 0  
LB 1.00 Hz  
GB 0  
PC 1.40

SPECTRUM NO:12 (Mass spectrum of Compound 5c)

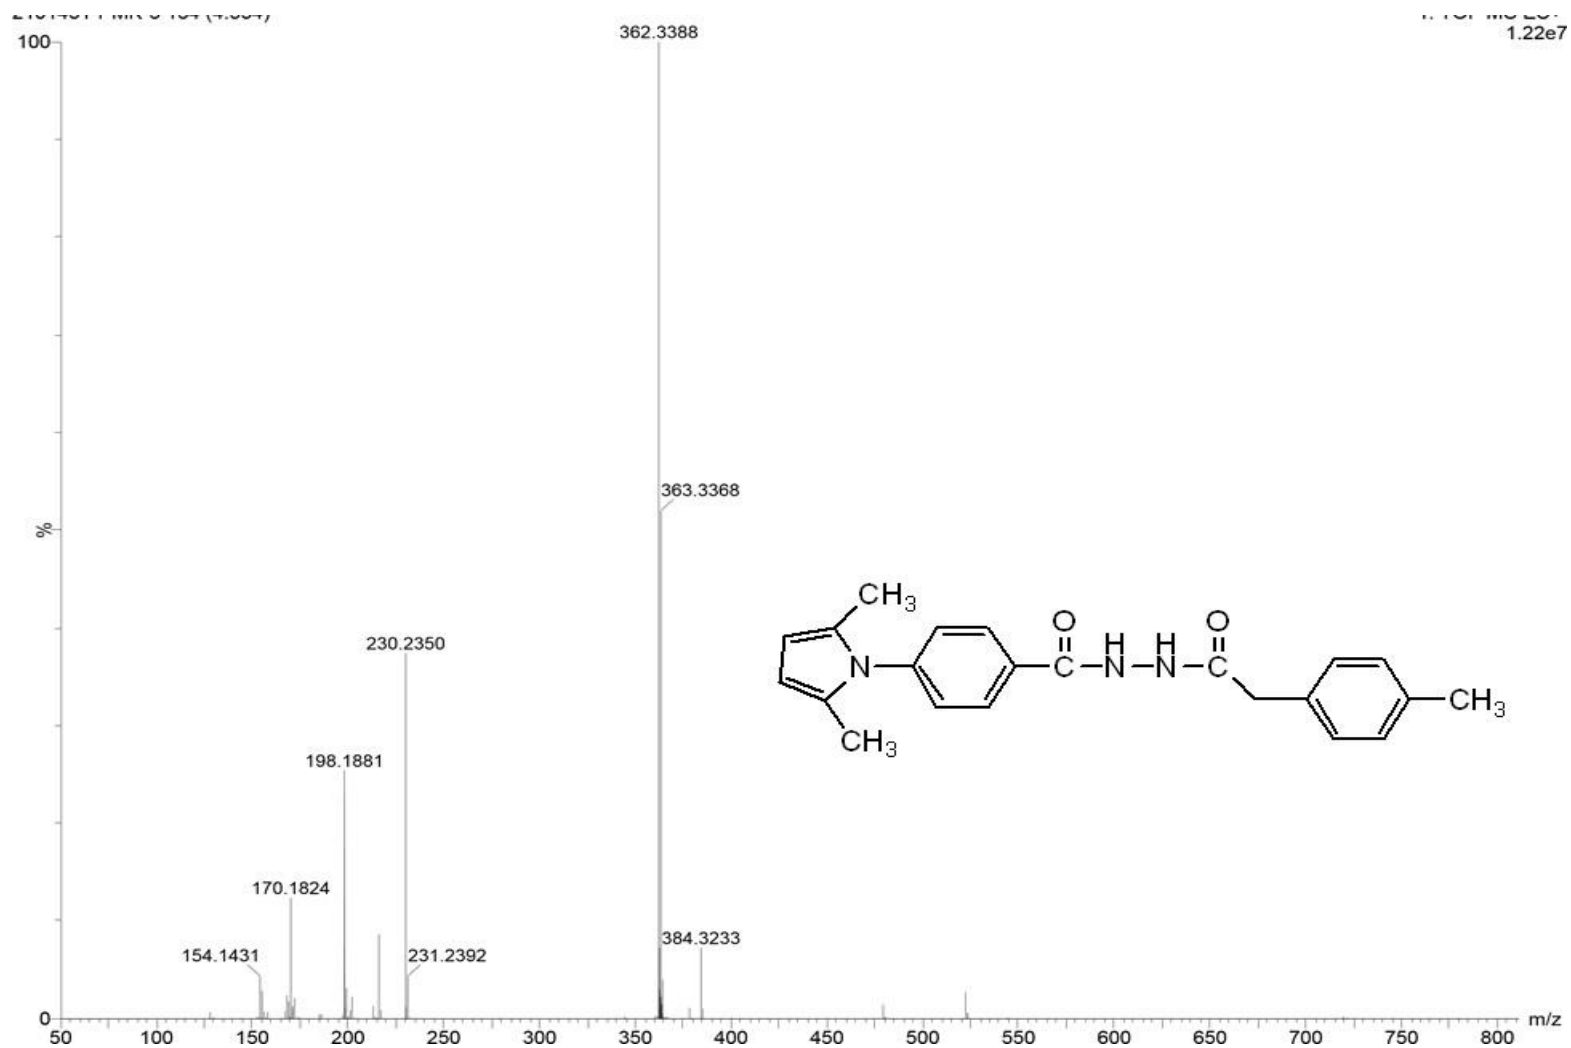

SPECTRUM NO:13 (IR spectrum of Compound 5d)

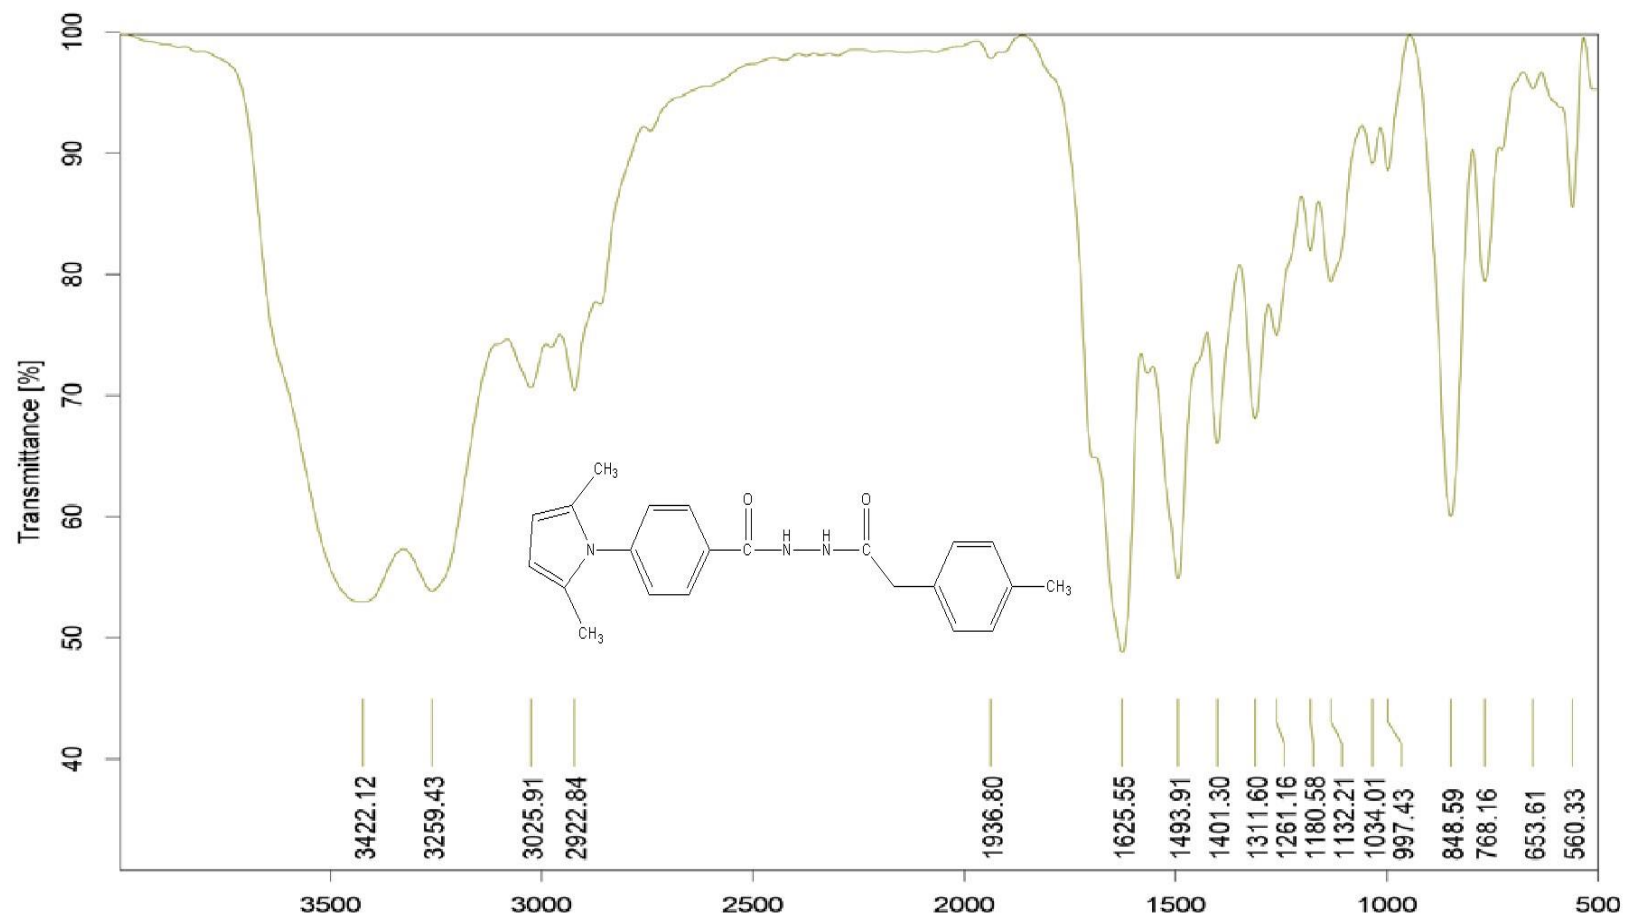

SPECTRUM NO:14 (<sup>1</sup>H NMR spectrum of Compound 5d)

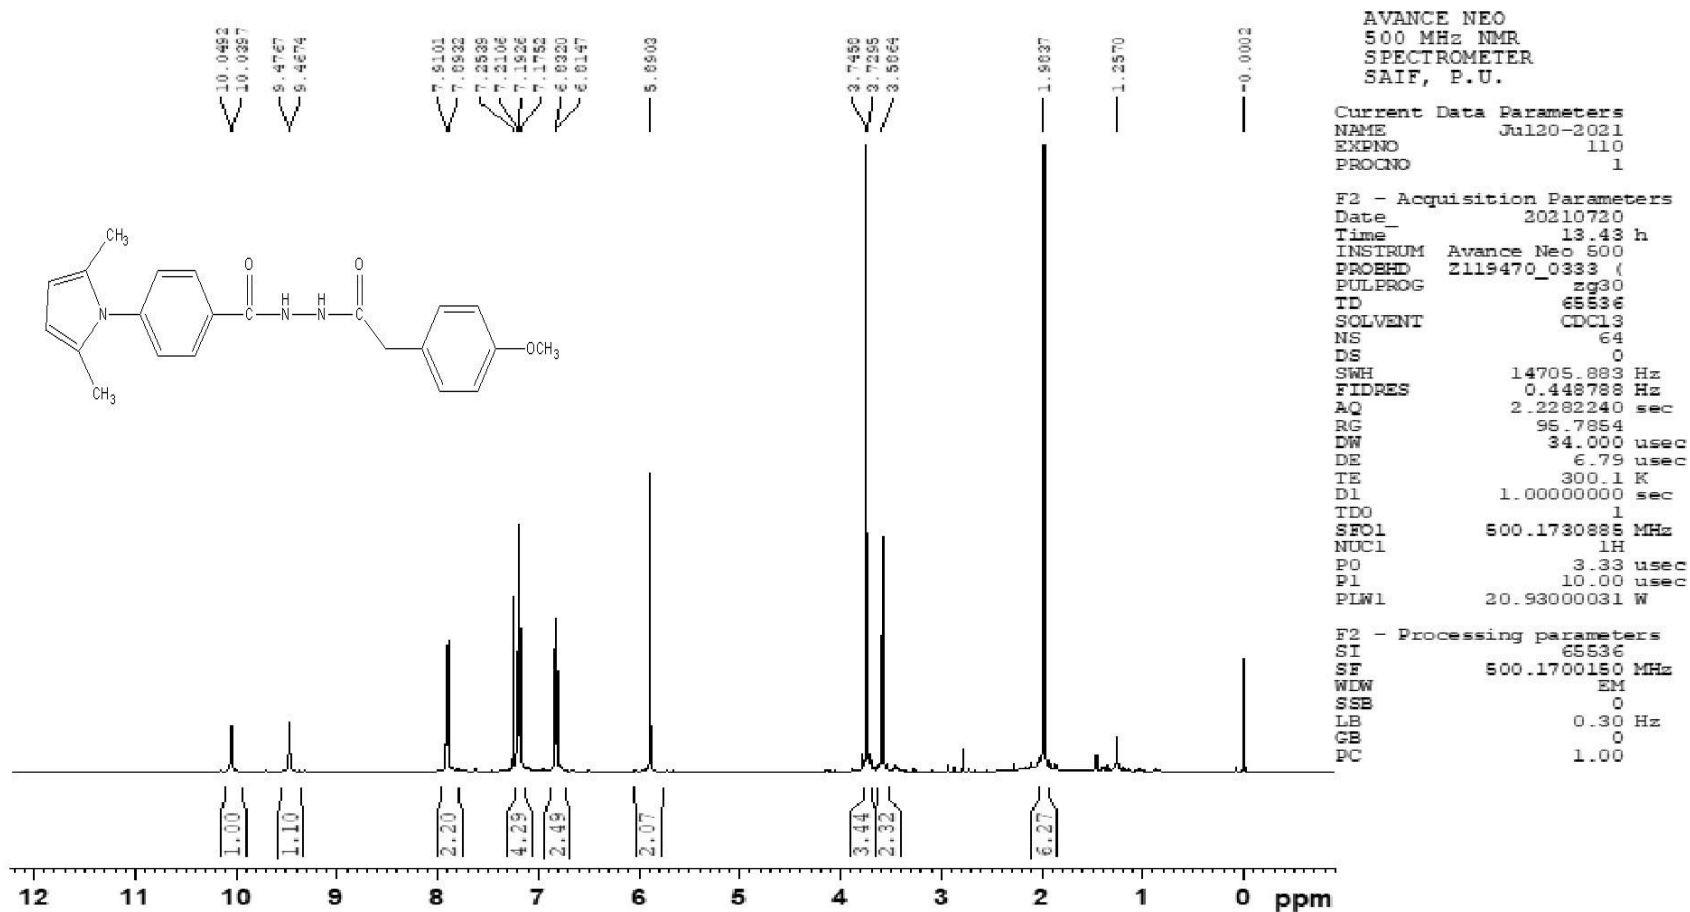

SPECTRUM NO:15 (<sup>13</sup>C NMR spectrum of Compound 5d)

40CH33d  
C13CPD CDC13 {D:\Spectra} nmr 34

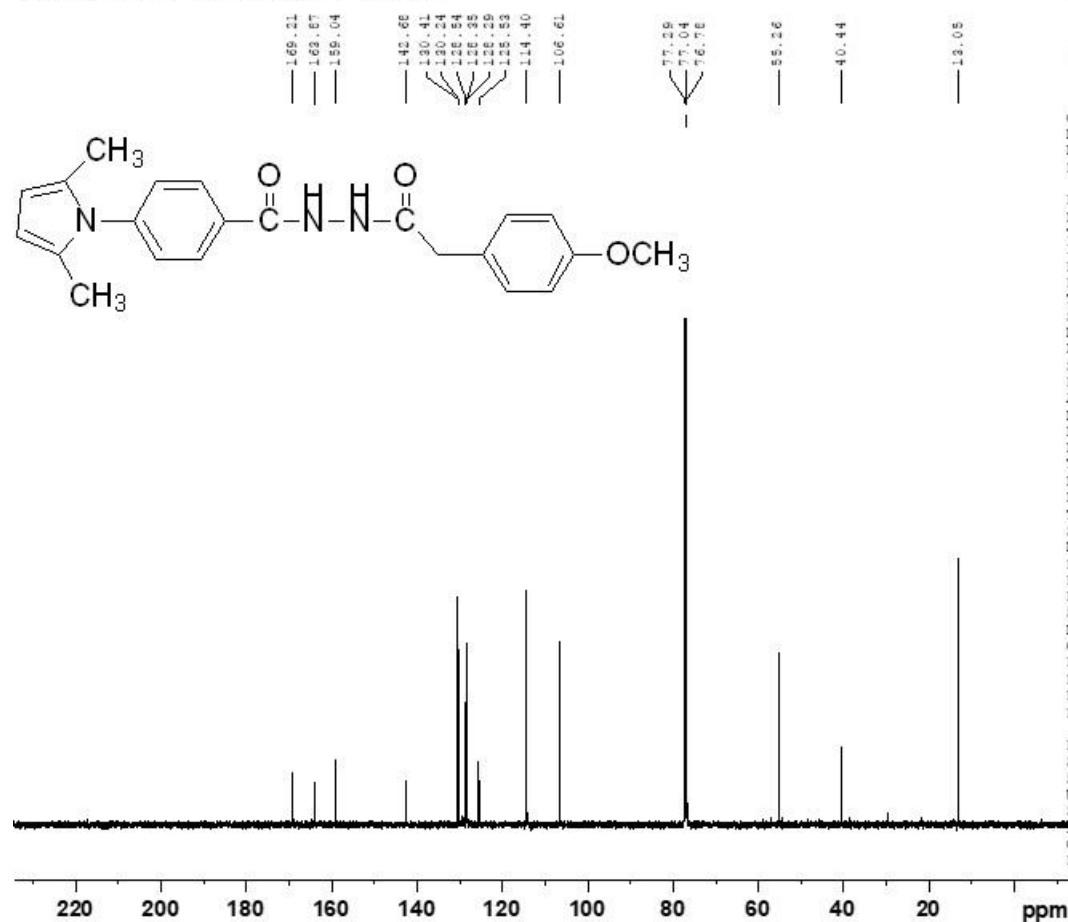

BRUKER  
AVANCE NEO  
500 MHz NMR SPECTROMETER  
SAIF, PANJAB UNIVERSITY,  
CHANDIGARH

Current Data Parameters  
NAME Mar02-2023  
EXPNO 341  
PROCNO 1

F2 - Acquisition Parameters  
Date 20230302  
Time 19.06 h  
INSTRUM Avance Neo 500  
PROBHD Z119470\_0323 (   
PULPROG zgpg30  
TD 65536  
SOLVENT CDC13  
NS 512  
DS 4  
SWH 37037.035 Hz  
FIDRES 1.130281 Hz  
AQ 0.8847260 sec  
RG 101  
DW 13.500 usec  
DE 6.50 usec  
TE 300.1 K  
D1 2.00000000 sec  
D11 0.03000000 sec  
TD0 1  
SFO1 125.7804233 MHz  
NUC1 13C  
P0 3.33 usec  
P1 10.00 usec  
PLW1 83.14099884 W  
SFO2 500.1720007 MHz  
NUC2 1H  
CPDPRG2 waltz65  
PCPD2 80.00 usec  
PLW2 20.93000031 W  
PLW12 0.32703000 W  
PLW13 0.16449000 W

F2 - Processing parameters  
SI 32768  
SF 125.7678465 MHz  
WDW EM  
SSB 0  
LB 1.00 Hz  
GB 0  
PC 1.40

SPECTRUM NO:16 (Mass spectrum of Compound 5d)

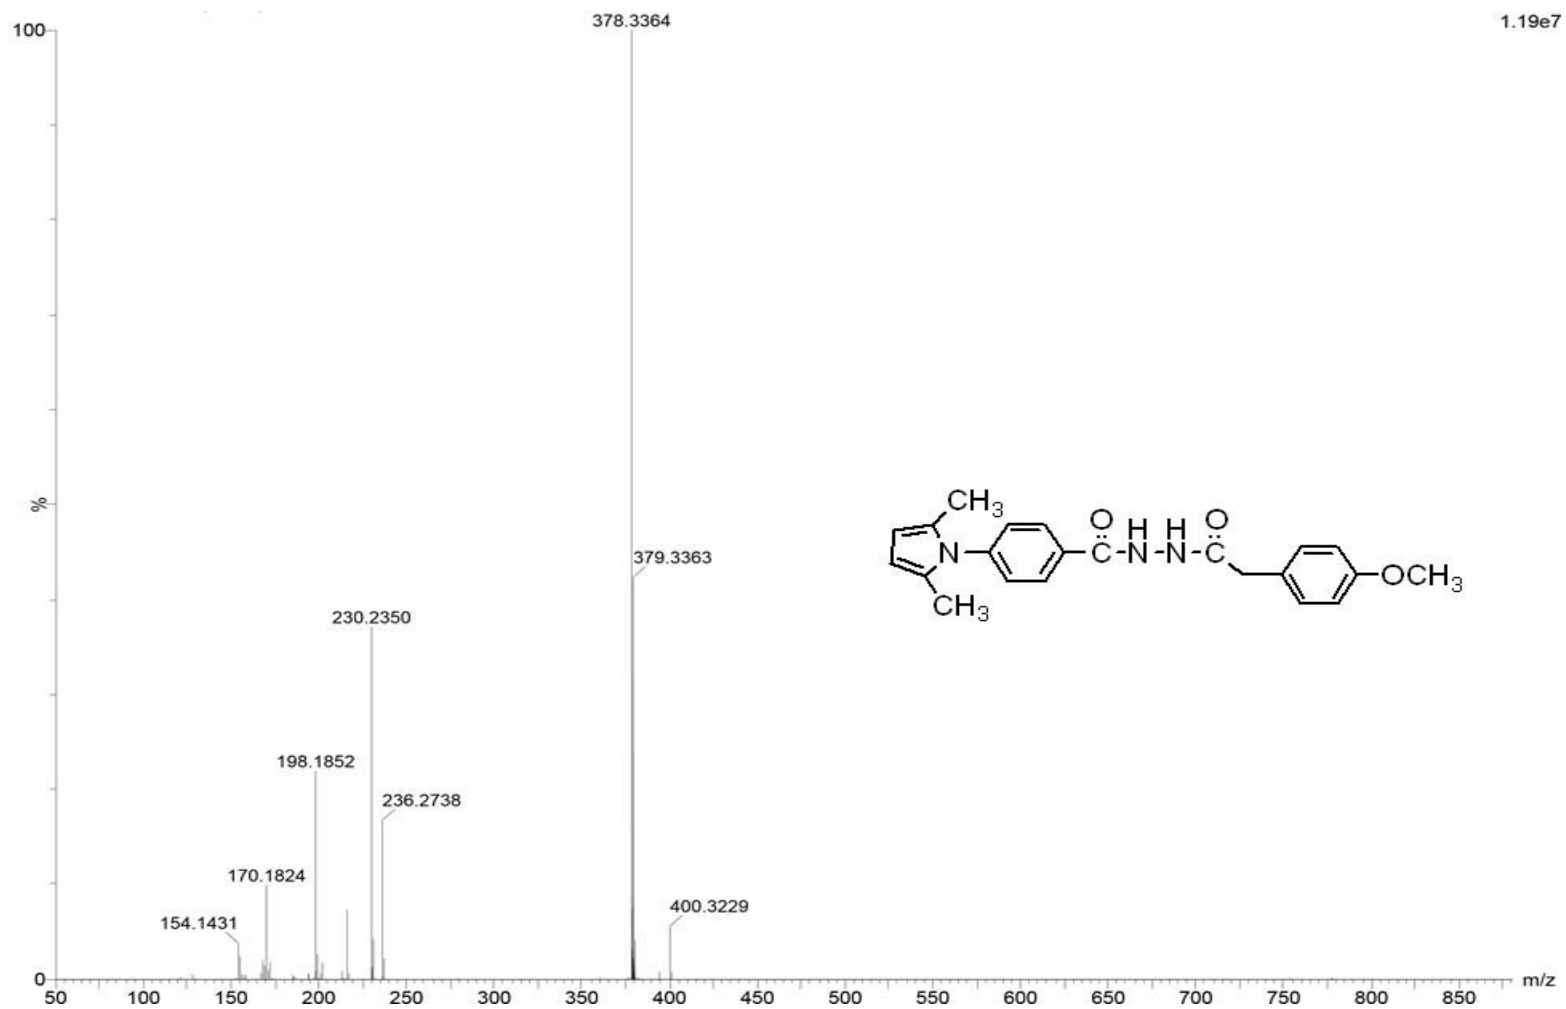

SPECTRUM NO:14



SPECTRUM NO :17 (IR spectrum of Compound 5e)

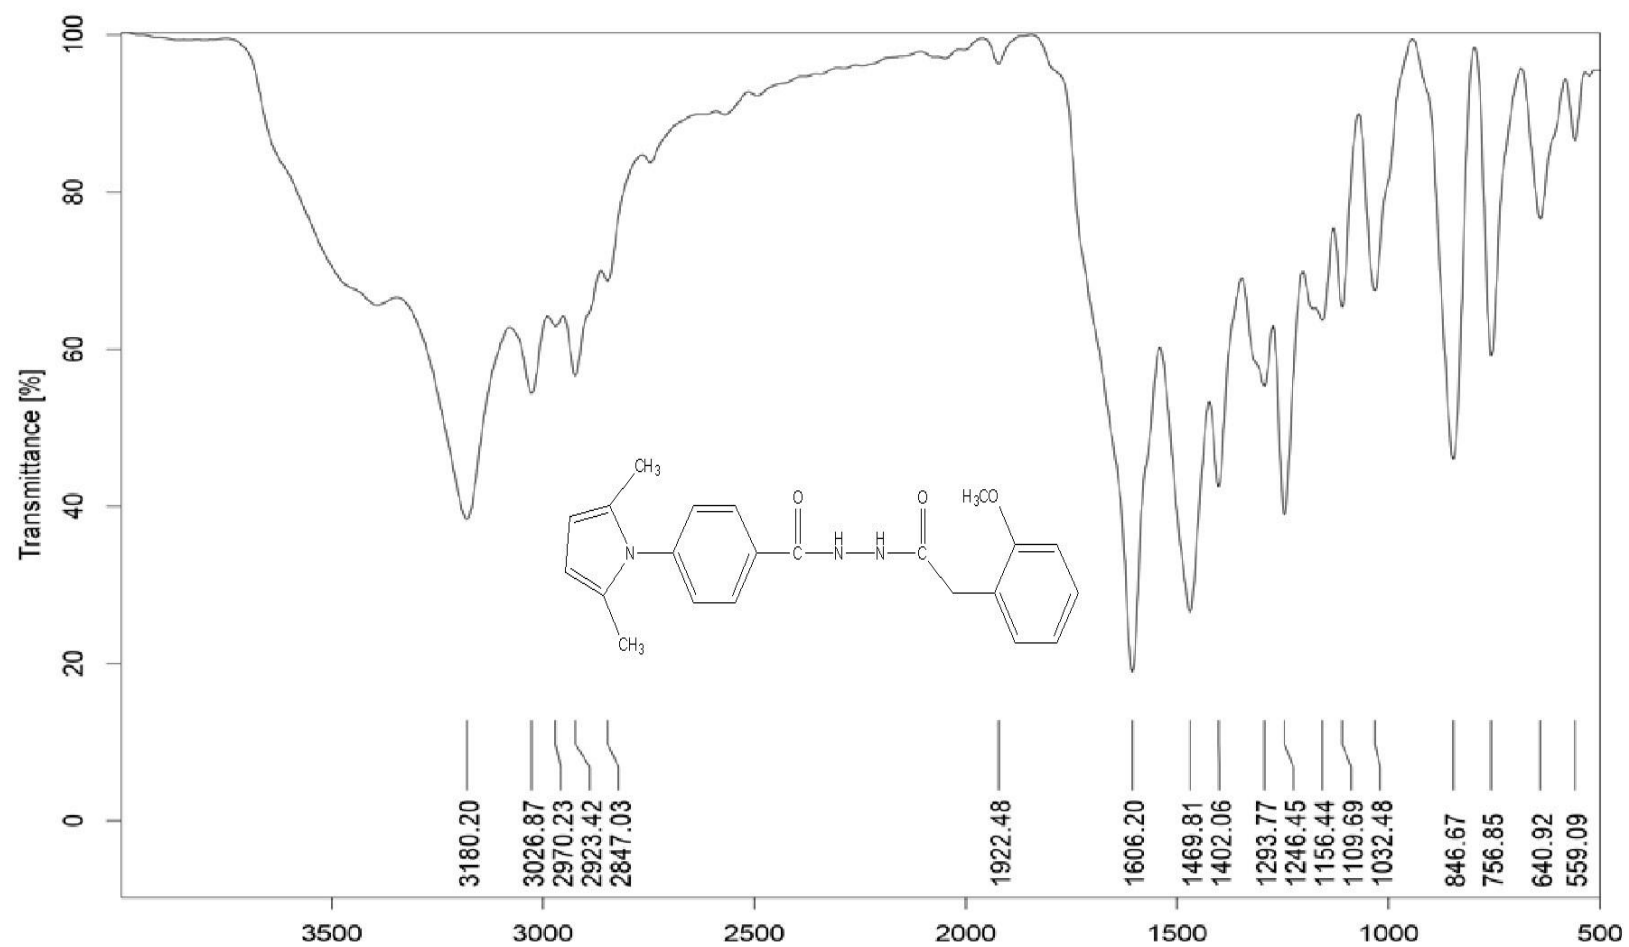

000001 -

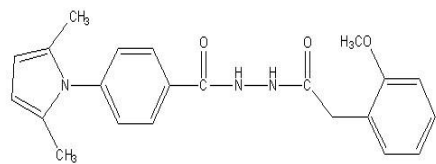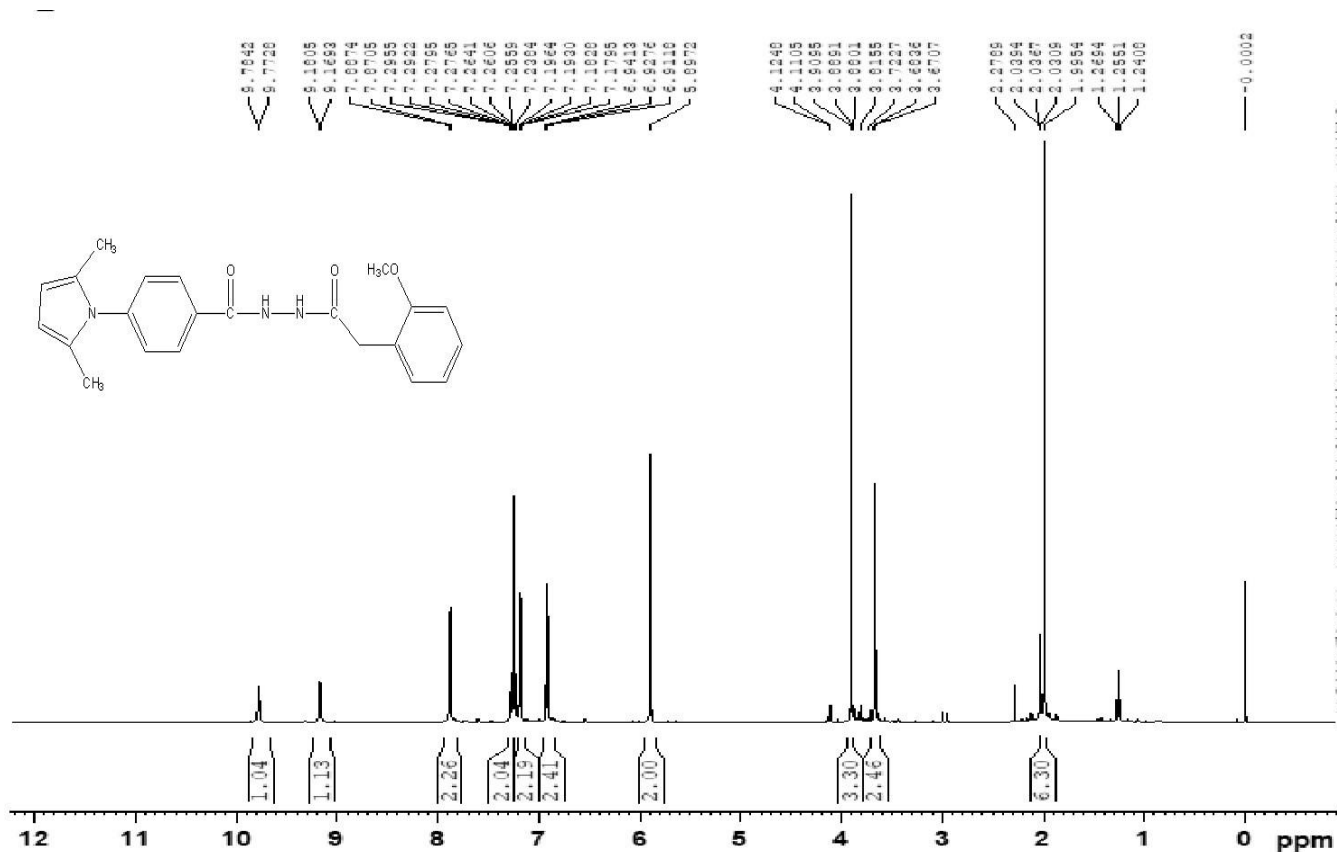

```

AVANCE NEO
500 MHz NMR
SPECTROMETER
SAIF, P.U.

Current Data Parameters
NAME      Jul20-2021
EXPNO     120
PROCNO    1

F2 - Acquisition Parameters
Date_     20210720
Time      13.48 h
INSTRUM   Avance Neo 500
PROBHD    Zll9470-0333 (
PULPROG   zg30
D         65536
SOLVENT   CDCl3
NS         64
DS         0
SWH        14705.883 Hz
FIDRES     0.448788 Hz
AQ         2.2382340 sec
RG         95.7854
AQW        34.000 usec
DE         6.75 usec
TE         300.1 K
D1         1.00000000 sec
DO         1
F01        500.1730885 MHz
FUC1       1H
FO        3.33 usec
P1         10.00 usec
PLW1       20.93000031 W

F2 - Processing parameters
SI         65536
F          500.1700141 MHz
WDW        EM
SSB        0
LB         0.30 Hz
GB         0
PC         1.00

```

SPECTRUM NO:19 (<sup>13</sup>C NMR spectrum of Compound 5e)

20CH33e  
C13CPD CDC13 {D:\Spectra} nmr 36

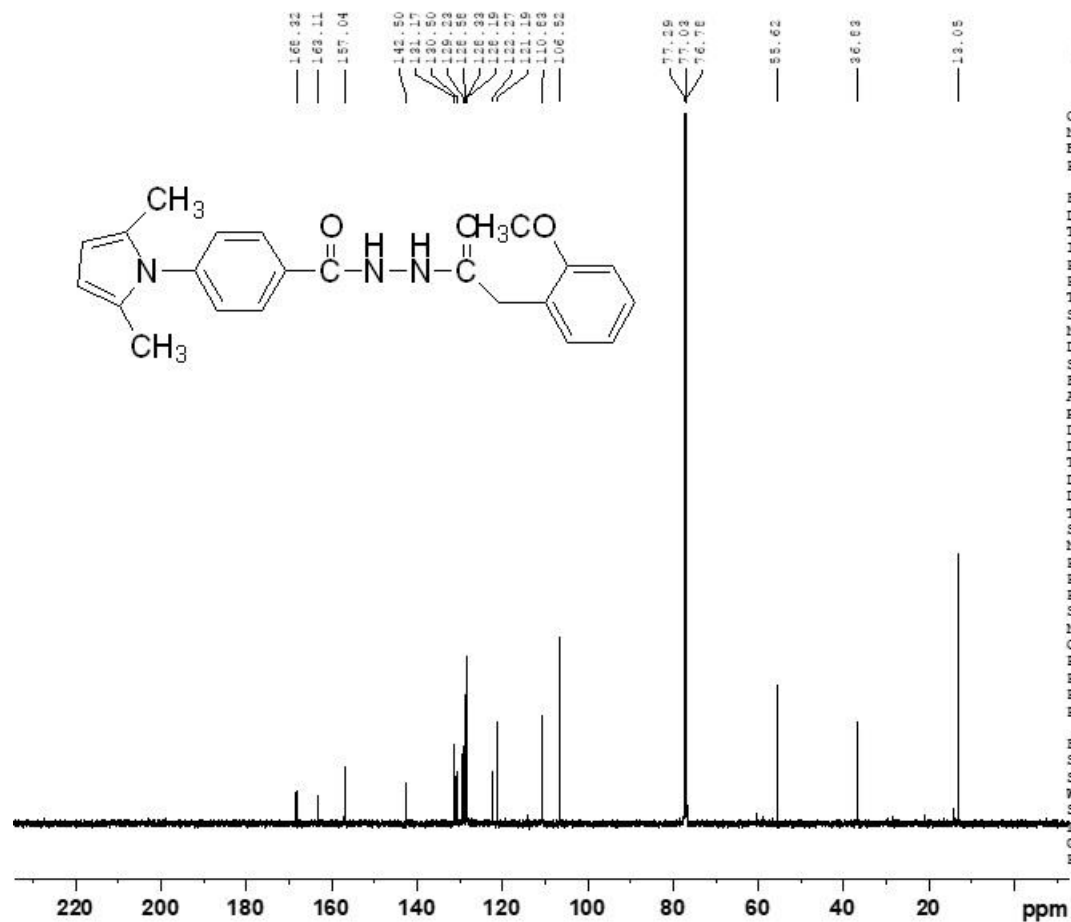

BRUKER  
AVANCE NEO  
500 MHz NMR SPECTROMETER  
SAIF, PANJAB UNIVERSITY,  
CHANDIGARH

Current Data Parameters  
NAME Mar02-2023  
EXPNO 361  
PROCNO 1

F2 - Acquisition Parameters  
Date\_ 20230302  
Time\_ 20.01 h  
INSTRUM Avance Neo 500  
PROBHD Z119470\_0323 (   
PULPROG zgpg30  
TD 65536  
SOLVENT CDC13  
NS 512  
DS 4  
SWH 37037.035 Hz  
FIDRES 1.130281 Hz  
AQ 0.8847360 sec  
RG 101  
DW 13.500 usec  
DE 6.50 usec  
TE 300.1 K  
D1 2.00000000 sec  
D11 0.03000000 sec  
TD0 1  
SFO1 125.7804233 MHz  
NUC1 13C  
P0 3.32 usec  
P1 10.00 usec  
PLW1 83.14099884 W  
SFO2 500.1720007 MHz  
NUC2 1H  
CPDPRG[2] waltz65  
PCPD2 80.00 usec  
PLW2 20.92000031 W  
PLW12 0.32703000 W  
PLW13 0.16449000 W

F2 - Processing parameters  
SI 32768  
SF 125.7678465 MHz  
WDW EM  
SSE 0  
LB 1.00 Hz  
GB 0  
PC 1.40

SPECTRUM NO:20 (Mass spectrum of Compound 5e)

230111-2OCH3 3e 87 (2.946)

1: TOF MS ES+  
3.21e6

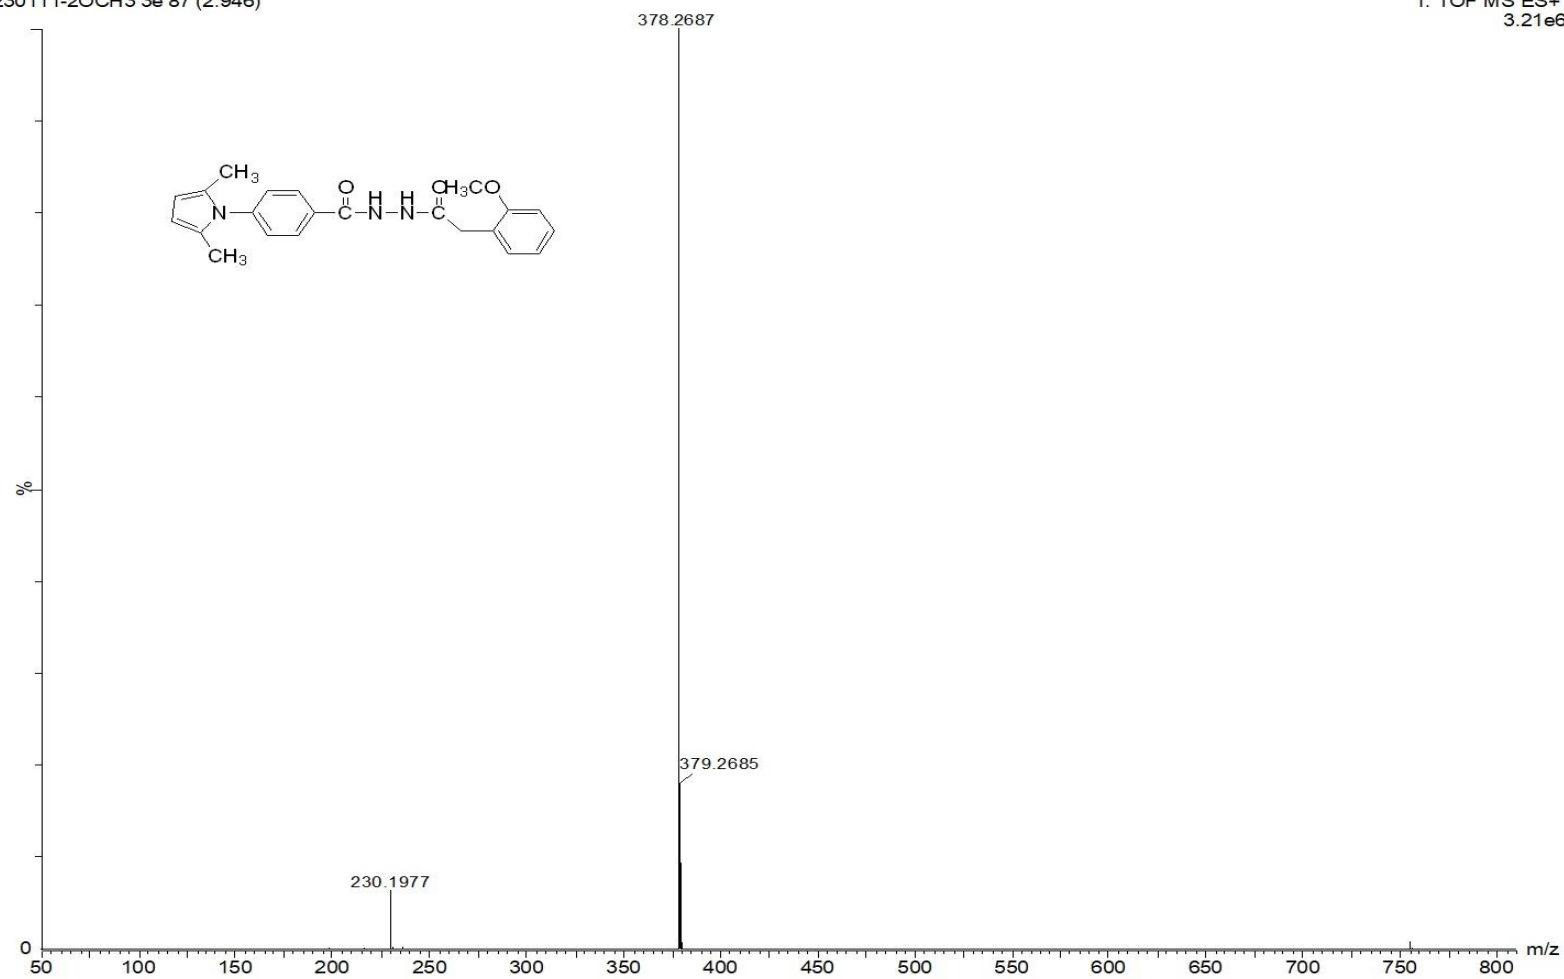

SPECTRUM NO: 21(IR spectrum of Compound 5f)

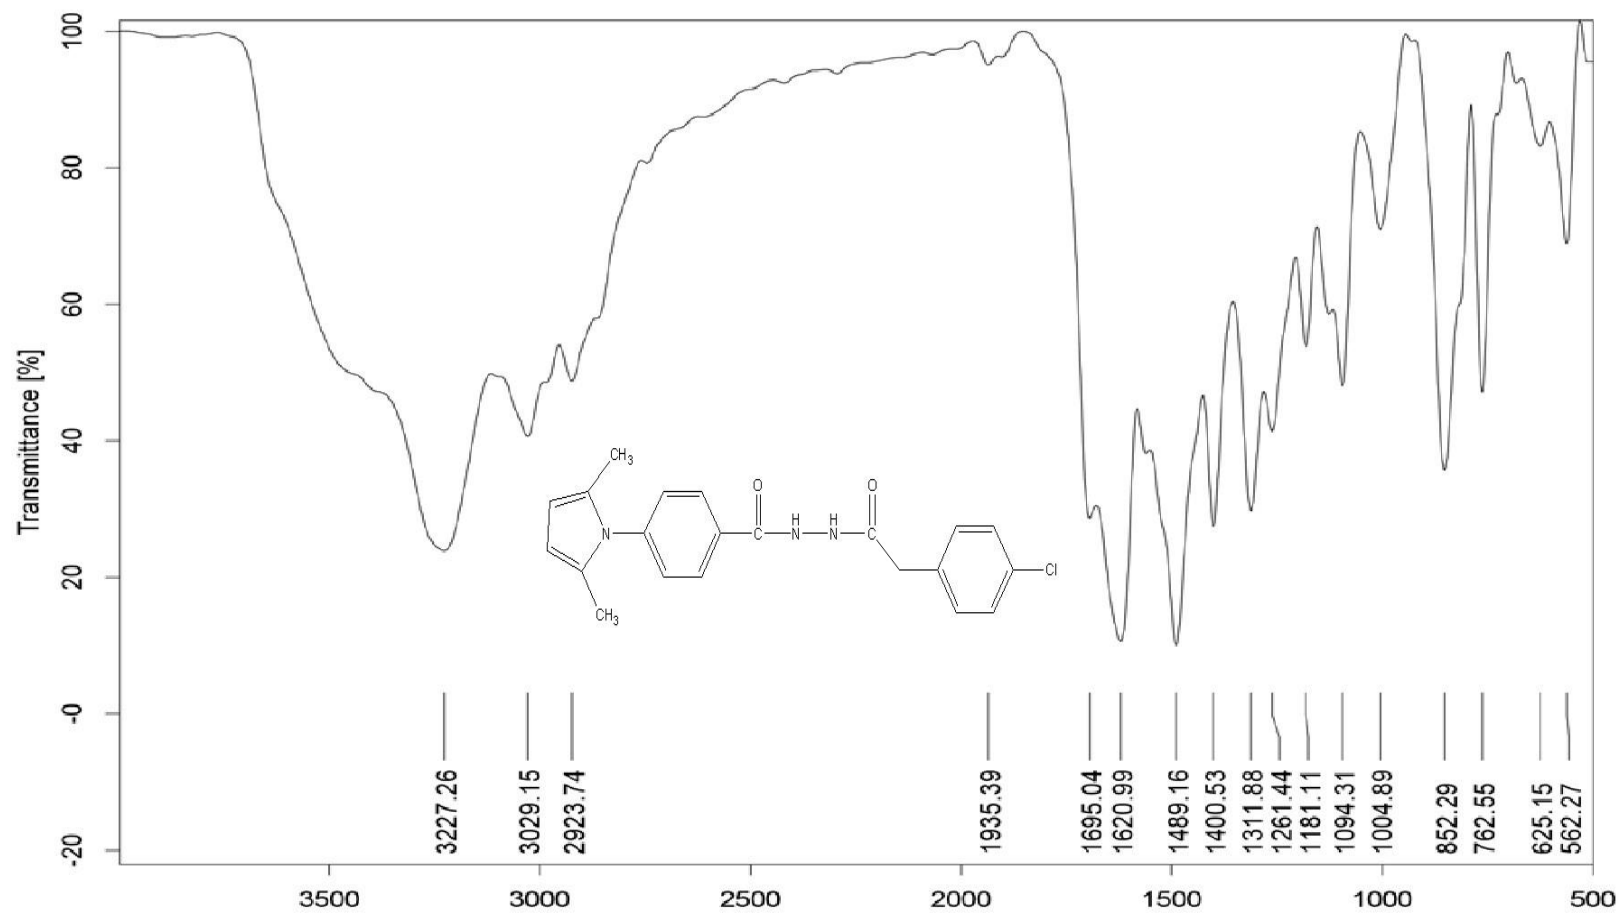

SPECTRUM NO: 22 (<sup>1</sup>H NMR spectrum of Compound 5f)

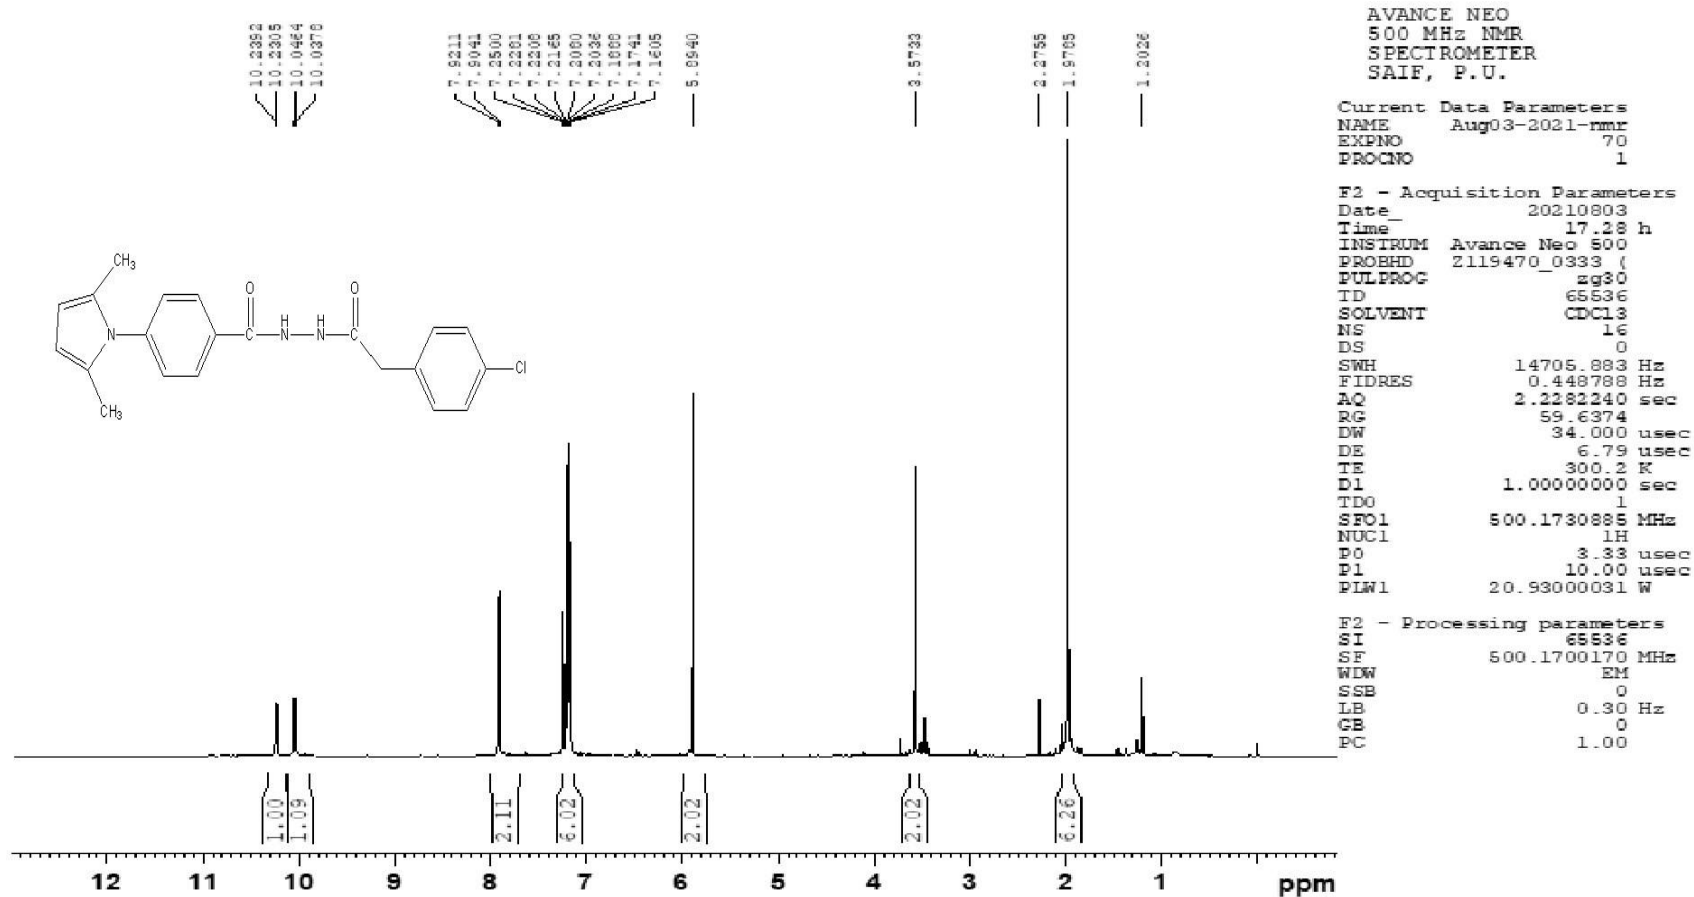

SPECTRUM NO: 23 (<sup>13</sup>C NMR spectrum of Compound 5f)

4C13F  
C13CPD CDC13 {D:\Spectra} nmr 35

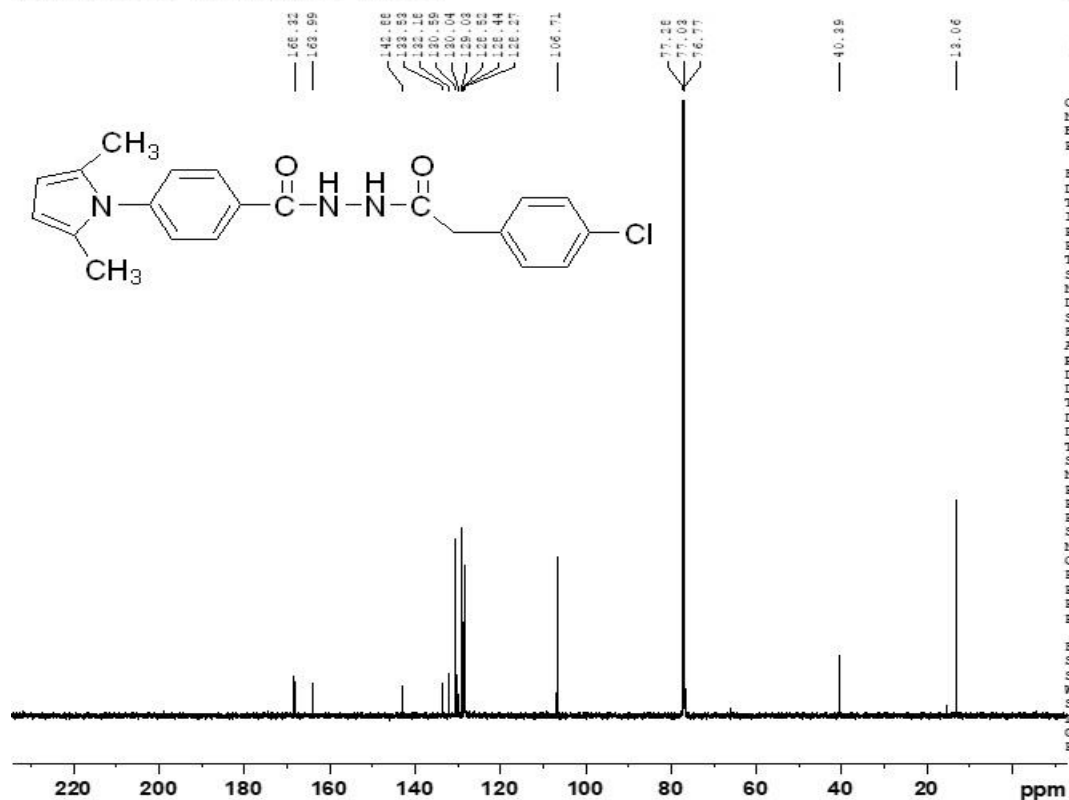

BRUKER  
AVANCE NEO  
500 MHz NMR SPECTROMETER  
SAIF, PANJAB UNIVERSITY,  
CHANDIGARH

Current Data Parameters

NAME Mar02-2023  
EXPNO 351  
PROCNO 1

F2 - Acquisition Parameters

Date\_ 20230302  
Time 19.24 h  
INSTRUM Avance Neo 500  
PROBHD Z119470\_0333 (   
PULPROG zgpg30  
TD 65536  
SOLVENT CDC13  
NS 512  
DS 4  
SWH 37037.035 Hz  
FIDRES 1.130281 Hz  
AQ 0.8847360 sec  
RG 101  
DW 13.500 usec  
DE 6.50 usec  
TE 300.2 K  
D1 2.00000000 sec  
D11 0.03000000 sec  
TD0 1  
SFO1 125.7804233 MHz  
NUC1 13C  
P0 3.33 usec  
P1 10.00 usec  
PLW1 83.14099884 W  
SFO2 500.1720007 MHz  
NUC2 1H  
CPDPRG2 waltz65  
PCPD2 80.00 usec  
PLW2 20.93000031 W  
PLW12 0.32703000 W  
PLW13 0.16449000 W

F2 - Processing parameters

SI 32768  
SF 125.7678465 MHz  
WDW EM  
SSE 0  
LB 1.00 Hz  
GB 0  
PC 1.40

SPECTRUM NO:24 (Mass spectrum of Compound 5f)

230113-4Cl 3f 91 (3.081)

1: TOF MS ES+  
6.54e5

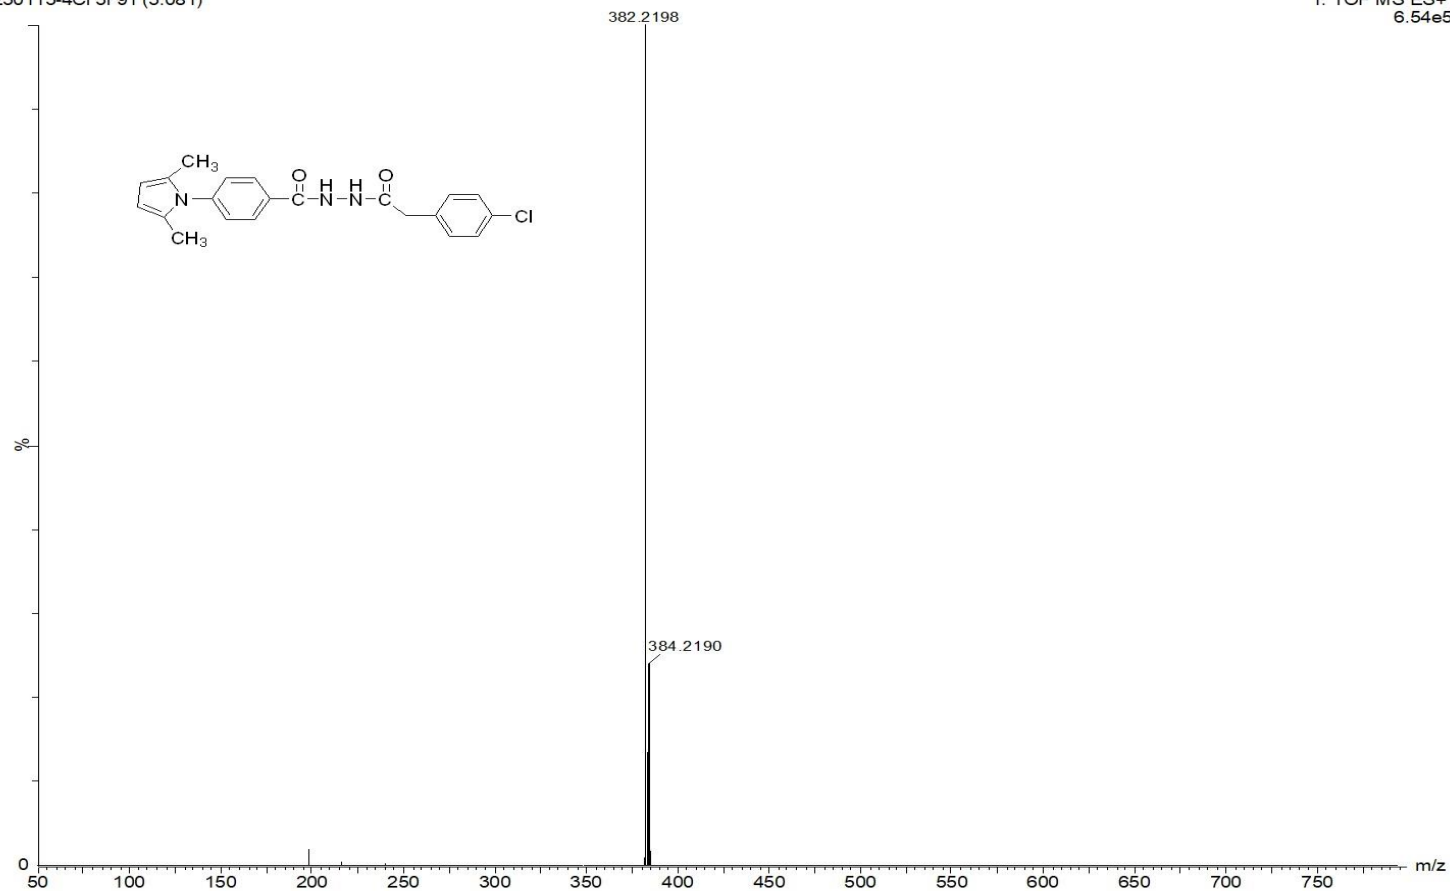



SPECTRUM NO: 25 (IR spectrum of Compound 5g)

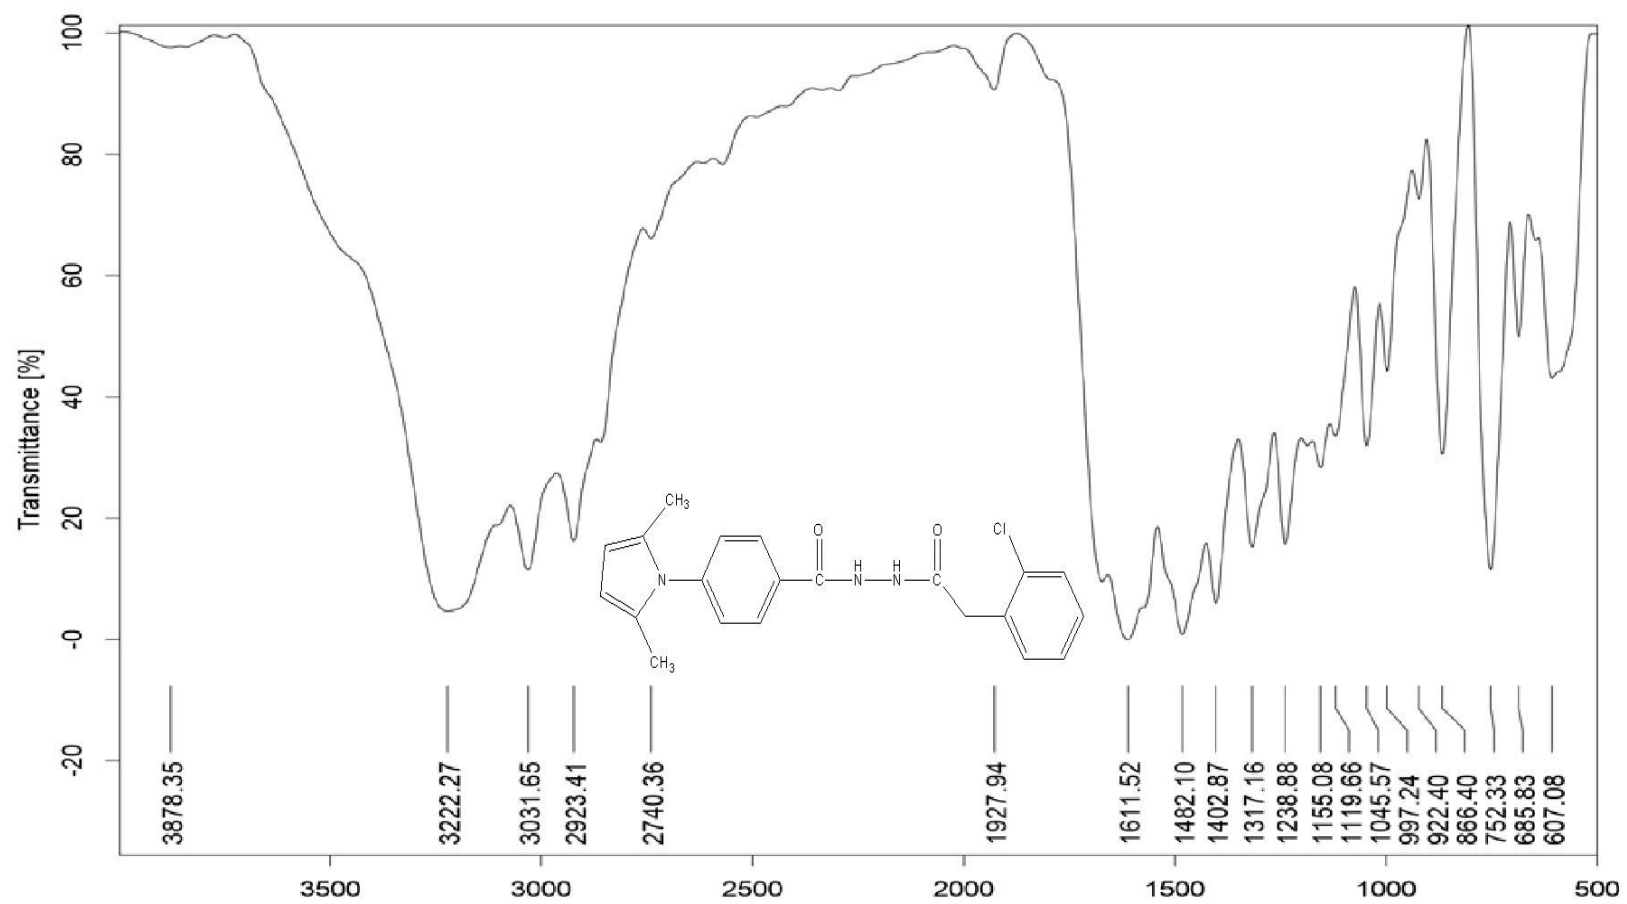

SPECTRUM NO: 26 (<sup>1</sup>H NMR spectrum of Compound 5g)

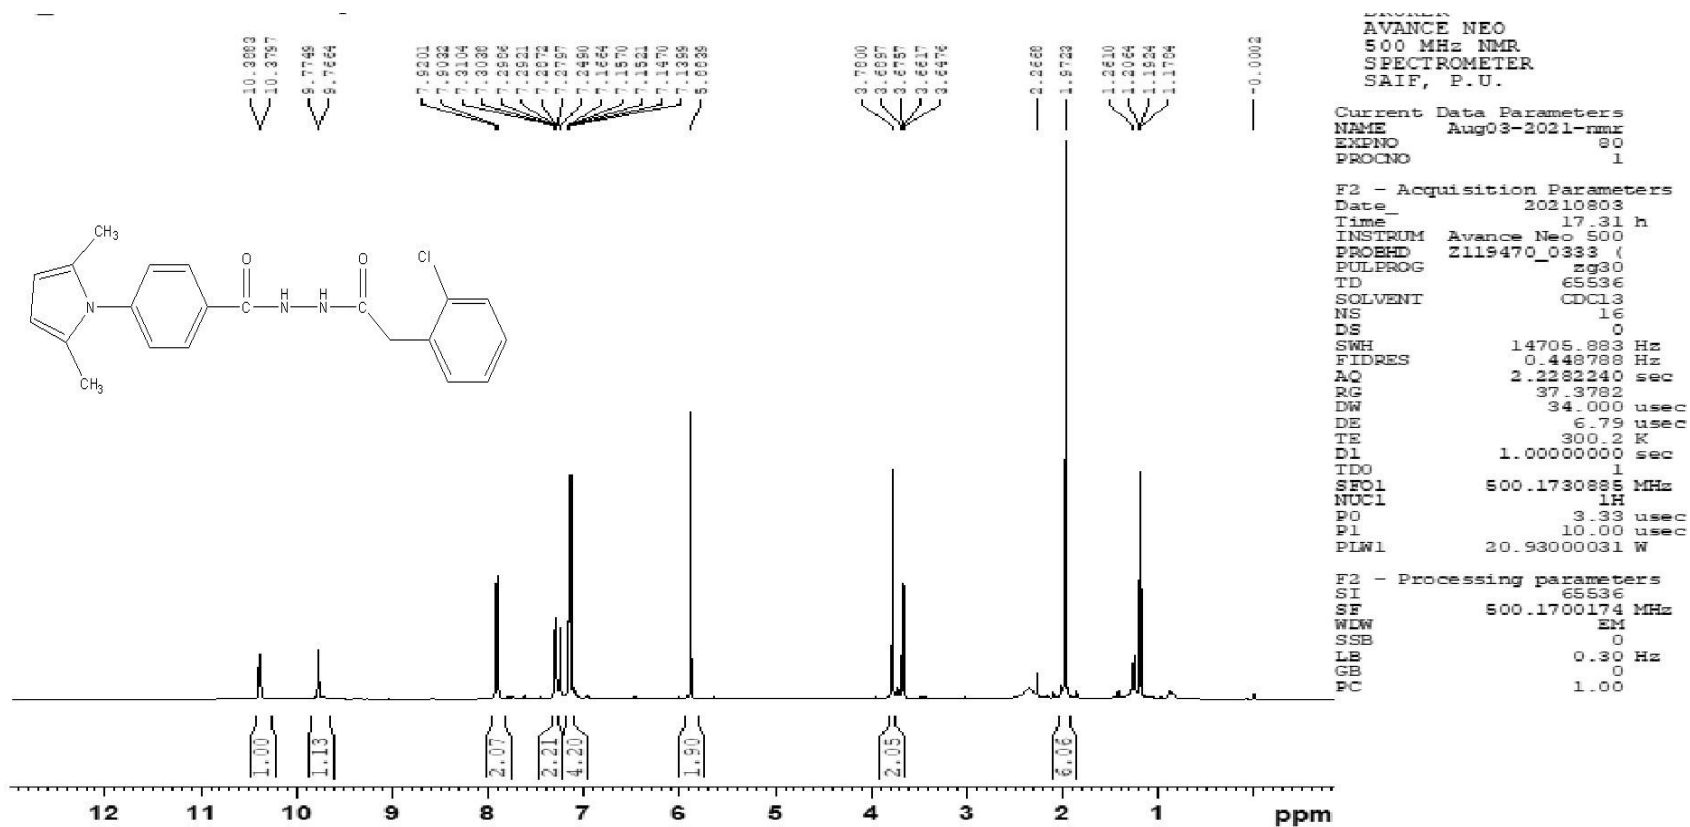

SPECTRUM NO: 27 (<sup>13</sup>C NMR spectrum of Compound 5g)

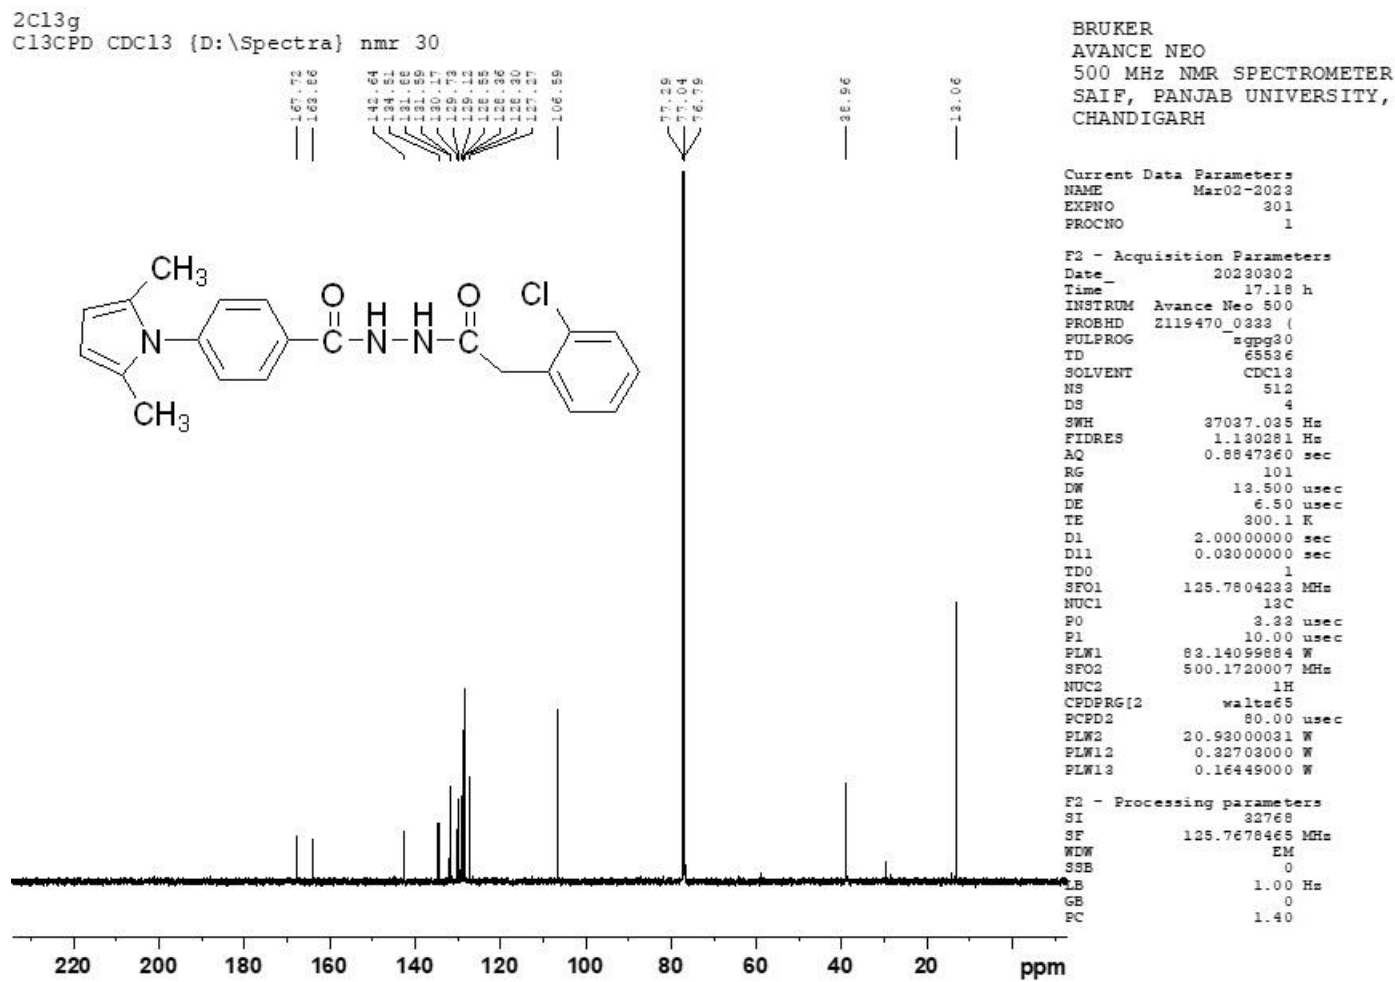

SPECTRUM NO: 28 ( $^{13}\text{C}$  NMR spectrum of Compound 5g)

230109-2Cl 3g 89 (3.013)

1: TOF MS ES+  
1.34e6

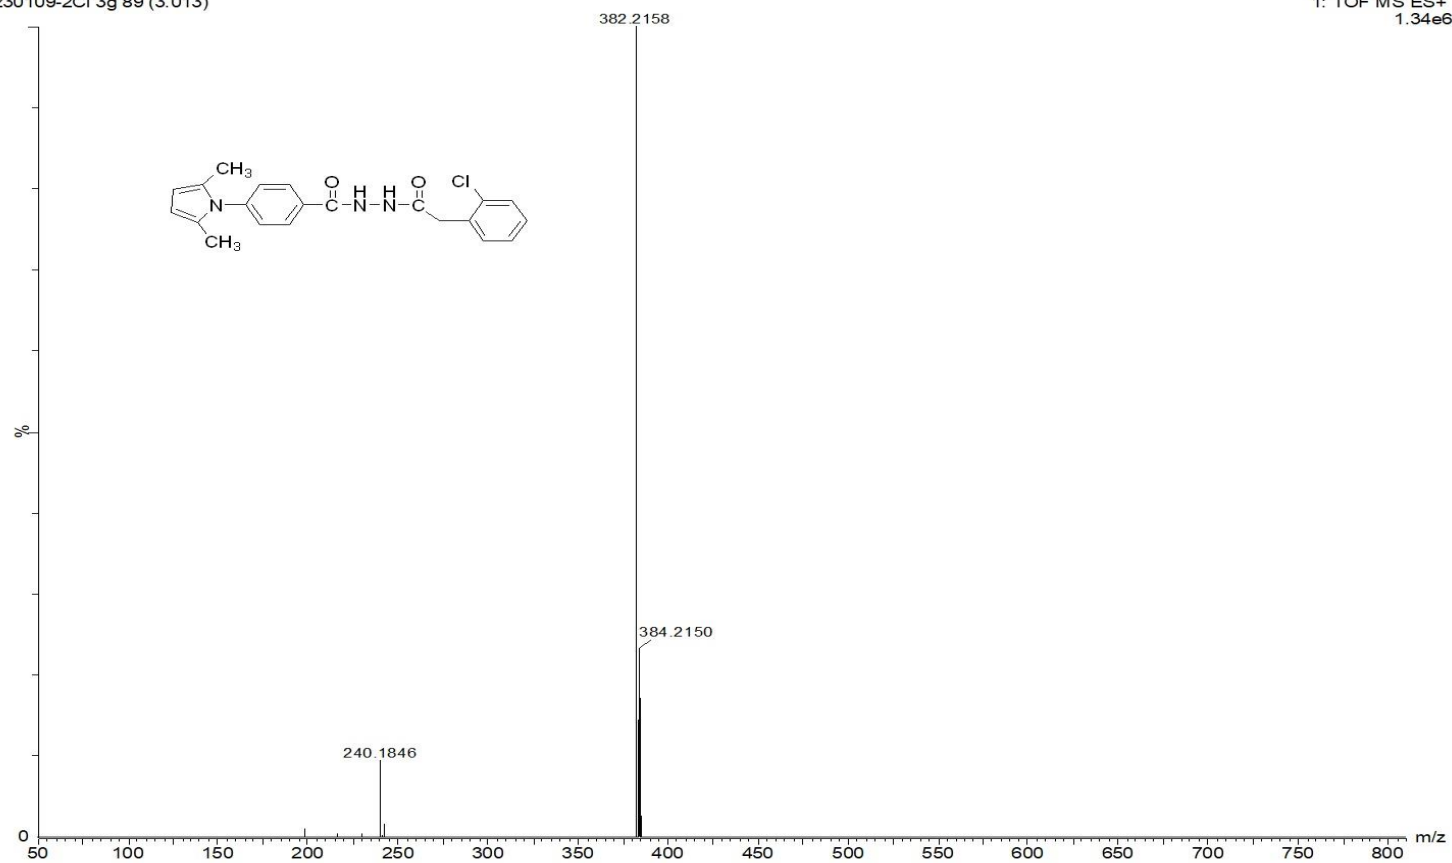

SPECTRUM NO: 29 (IR spectrum of Compound 5h)

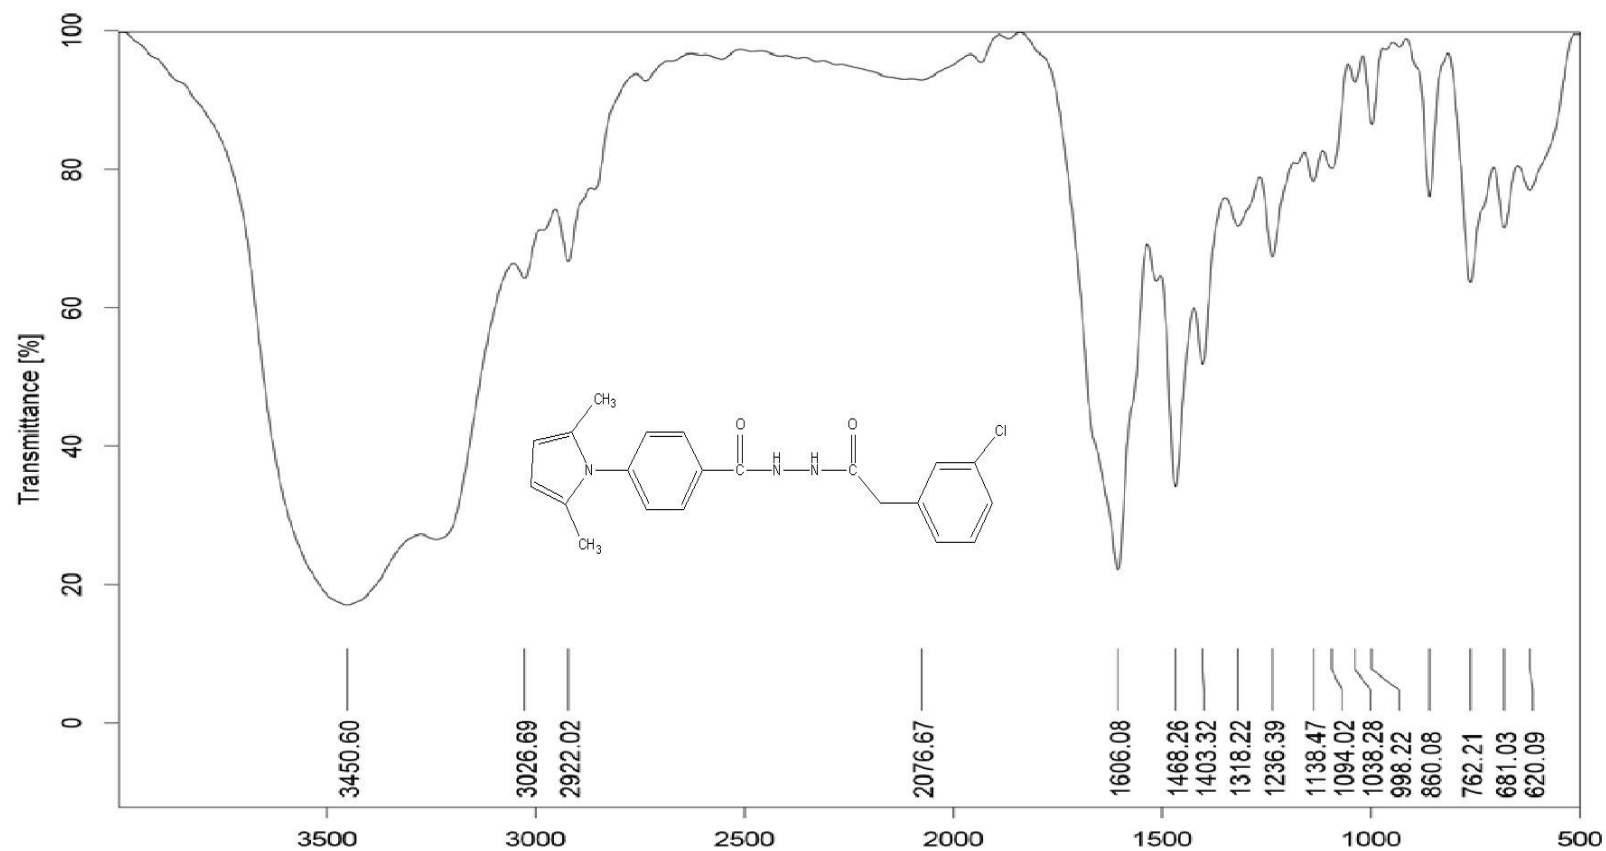

SPECTRUM NO: 30 (<sup>1</sup>H NMR spectrum of Compound 5h)

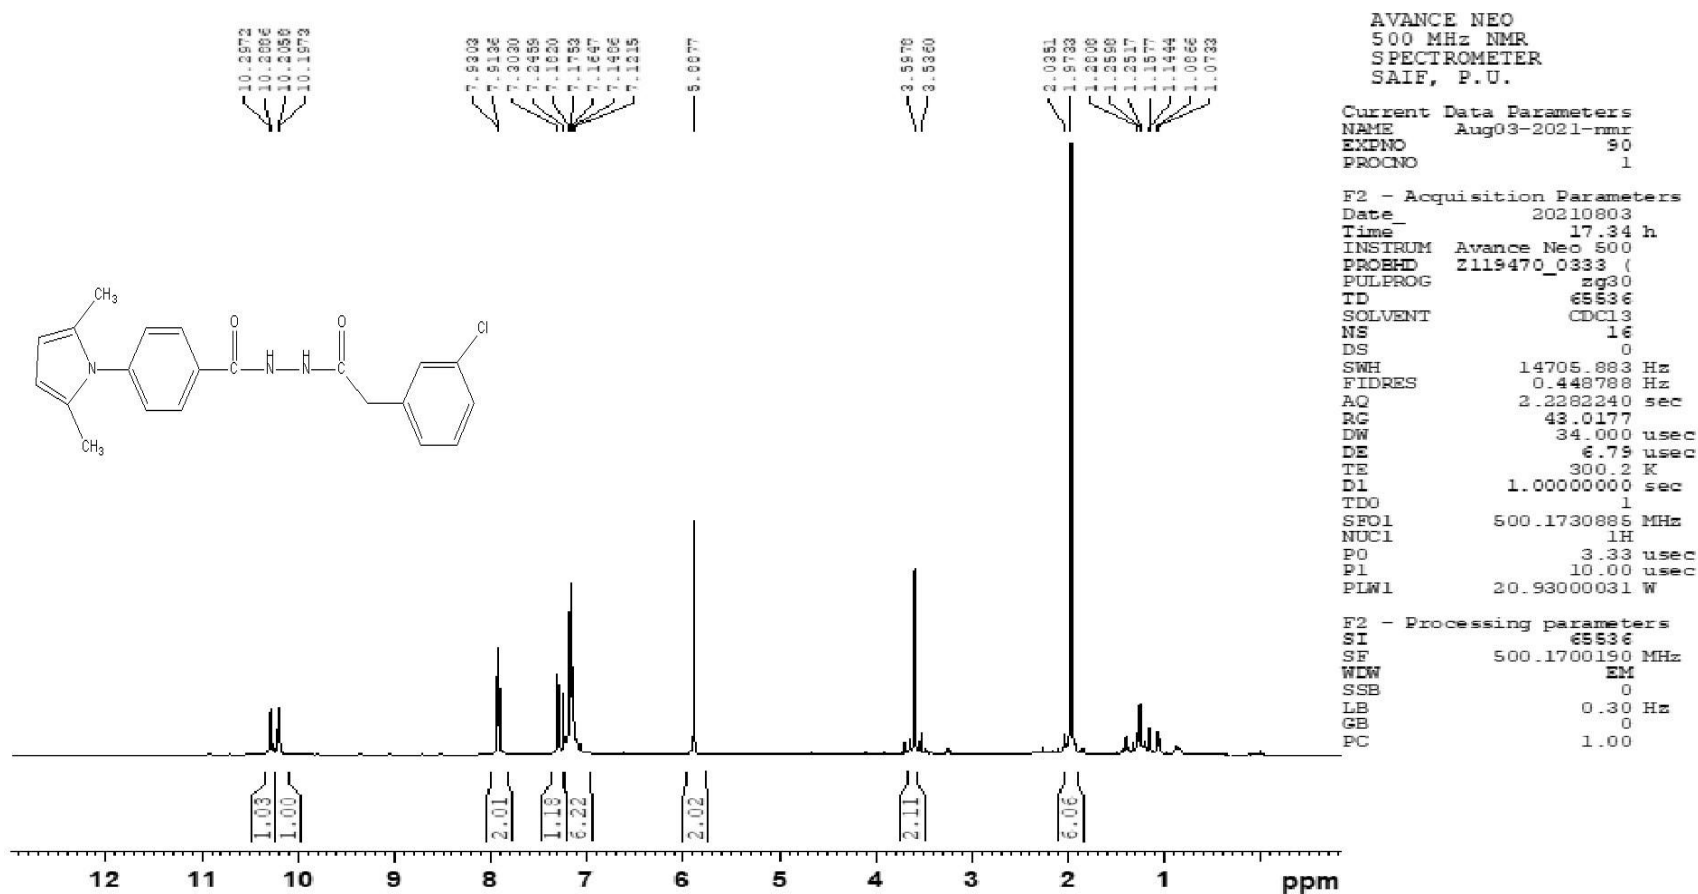

SPECTRUM NO: 31 (<sup>13</sup>C NMR spectrum of Compound 5h)

2C13h  
C13CPD CDC13 {D:\Spectra} nmr 32

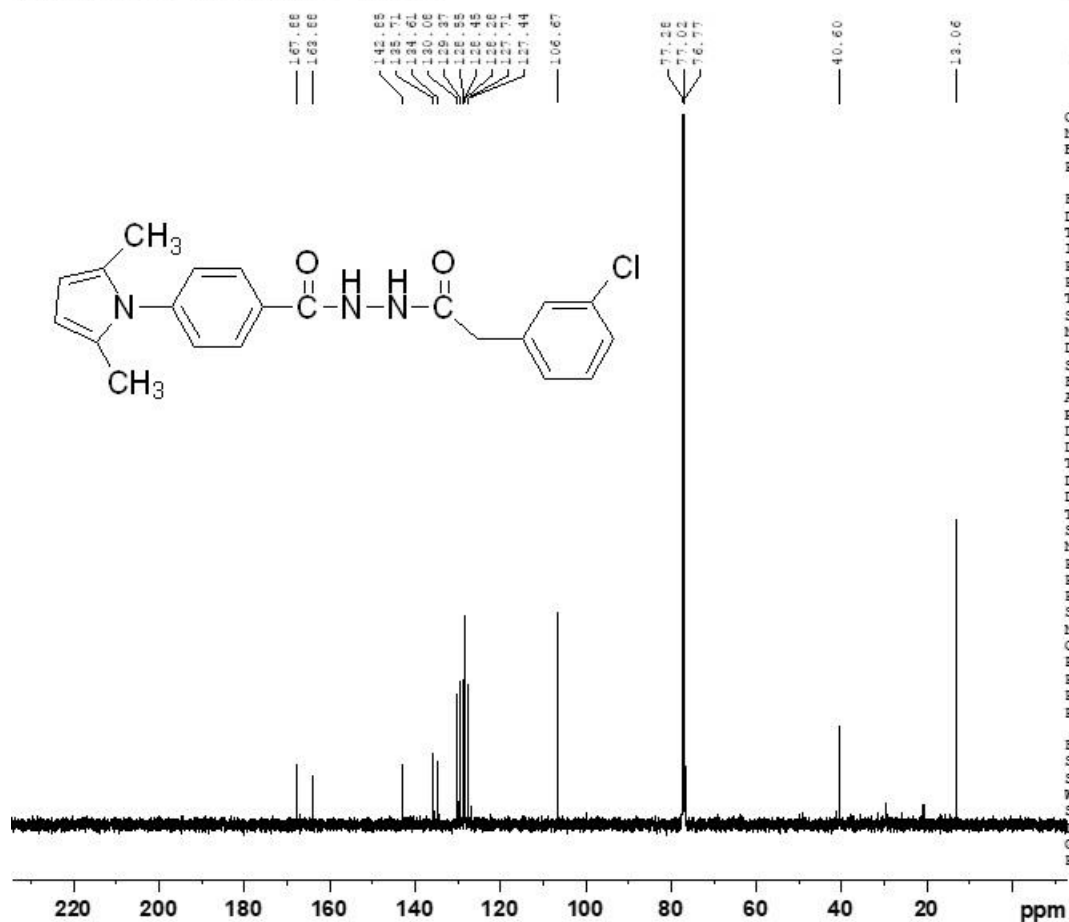

BRUKER  
AVANCE NEO  
500 MHz NMR SPECTROMETER  
SAIF, PANJAB UNIVERSITY,  
CHANDIGARH

Current Data Parameters  
NAME Mar02-2023  
EXPNO 321  
PROCNO 1

F2 - Acquisition Parameters  
Date\_ 20230302  
Time\_ 18.12 h  
INSTRUM Avance Neo 500  
PROBHD Z119470\_0323 (   
PULPROG zgpg30  
TD 65536  
SOLVENT CDC13  
NS 512  
DS 4  
SWH 37037.035 Hz  
FIDRES 1.130281 Hz  
AQ 0.8847260 sec  
RG 101  
DW 13.500 usec  
DE 6.50 usec  
TE 300.1 K  
D1 2.00000000 sec  
D11 0.03000000 sec  
TD0 1  
SFO1 125.7804233 MHz  
NUC1 13C  
P0 3.32 usec  
P1 10.00 usec  
PLW1 83.14099884 W  
SFO2 500.1720007 MHz  
NUC2 1H  
CPDPRG[2] waltz65  
PCPD2 80.00 usec  
PLW2 20.93000031 W  
PLW12 0.32703000 W  
PLW13 0.16449000 W

F2 - Processing parameters  
SI 32768  
SF 125.7678465 MHz  
WDW EM  
SSE 0  
LB 1.00 Hz  
GB 0  
PC 1.40

SPECTRUM NO: 32 (Mass spectrum of Compound 5h)

230108-3Cl 3h 90 (3.047)

1: TOF MS ES+  
4.13e6

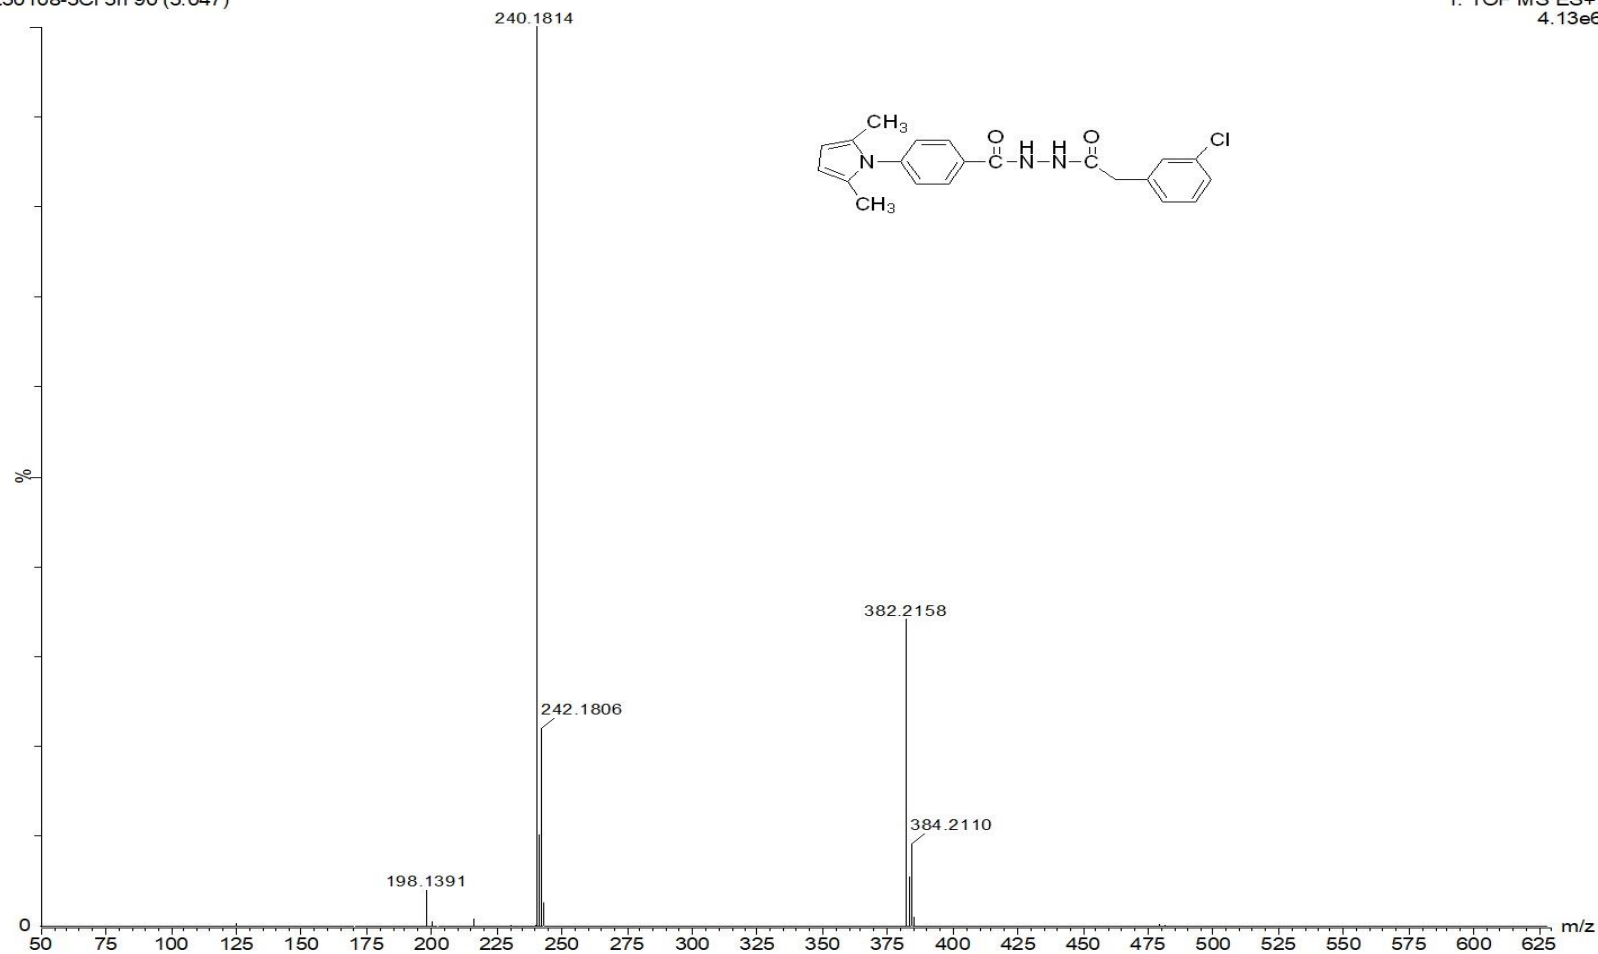



SPECTRUM NO: 33 (IR spectrum of Compound 5i)

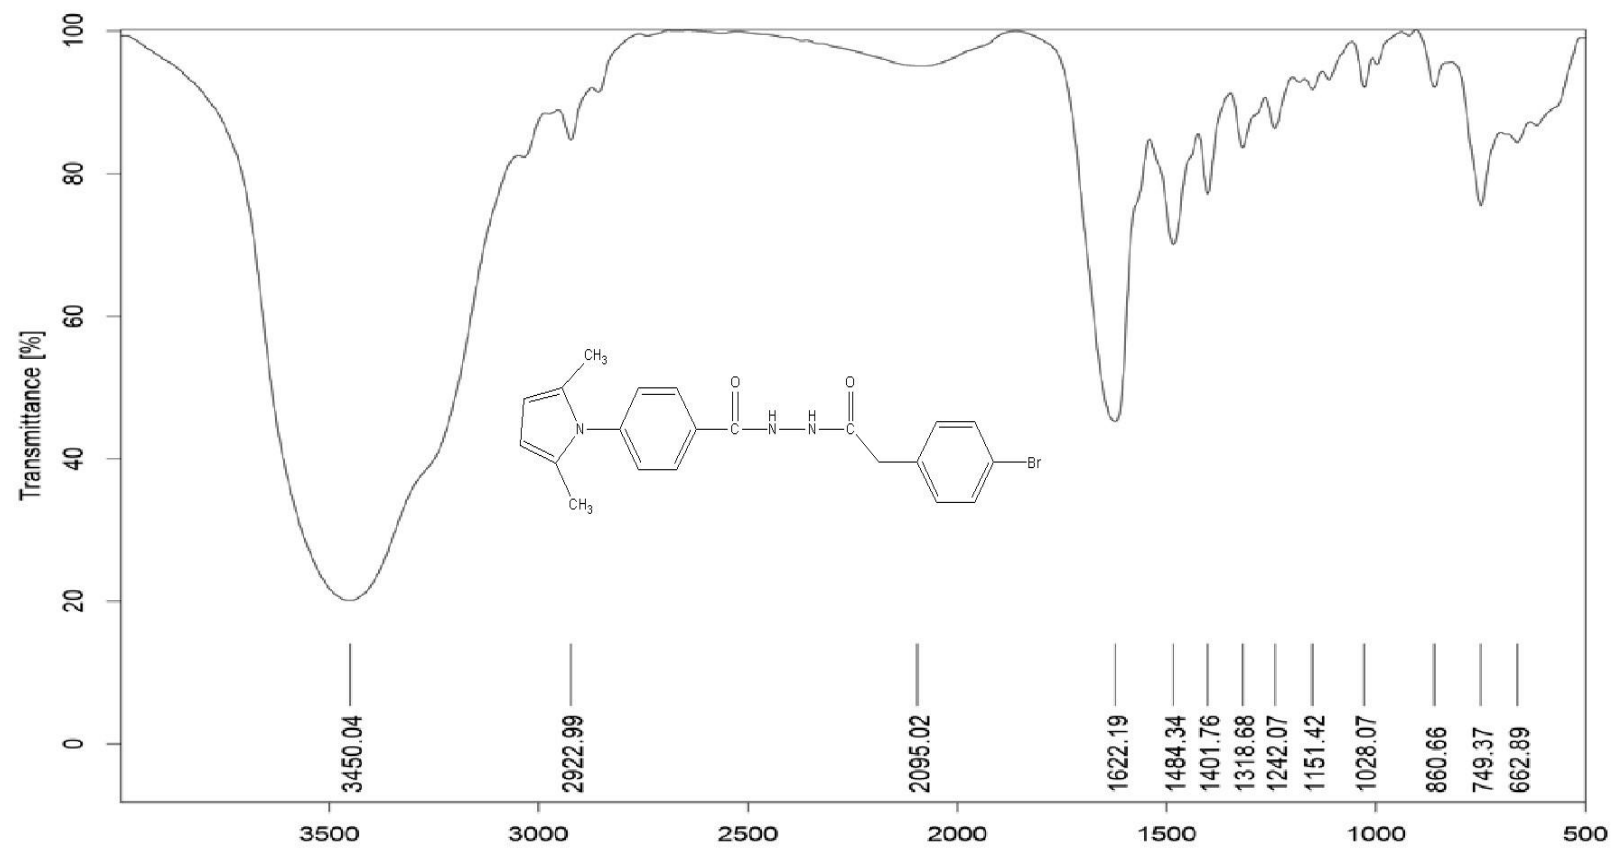

SPECTRUM NO: 34 (<sup>1</sup>H NMR spectrum of Compound 5i)

1H\_8scan CDC13 {D:\Spectra} nmr110

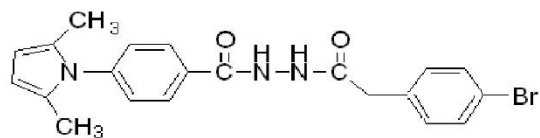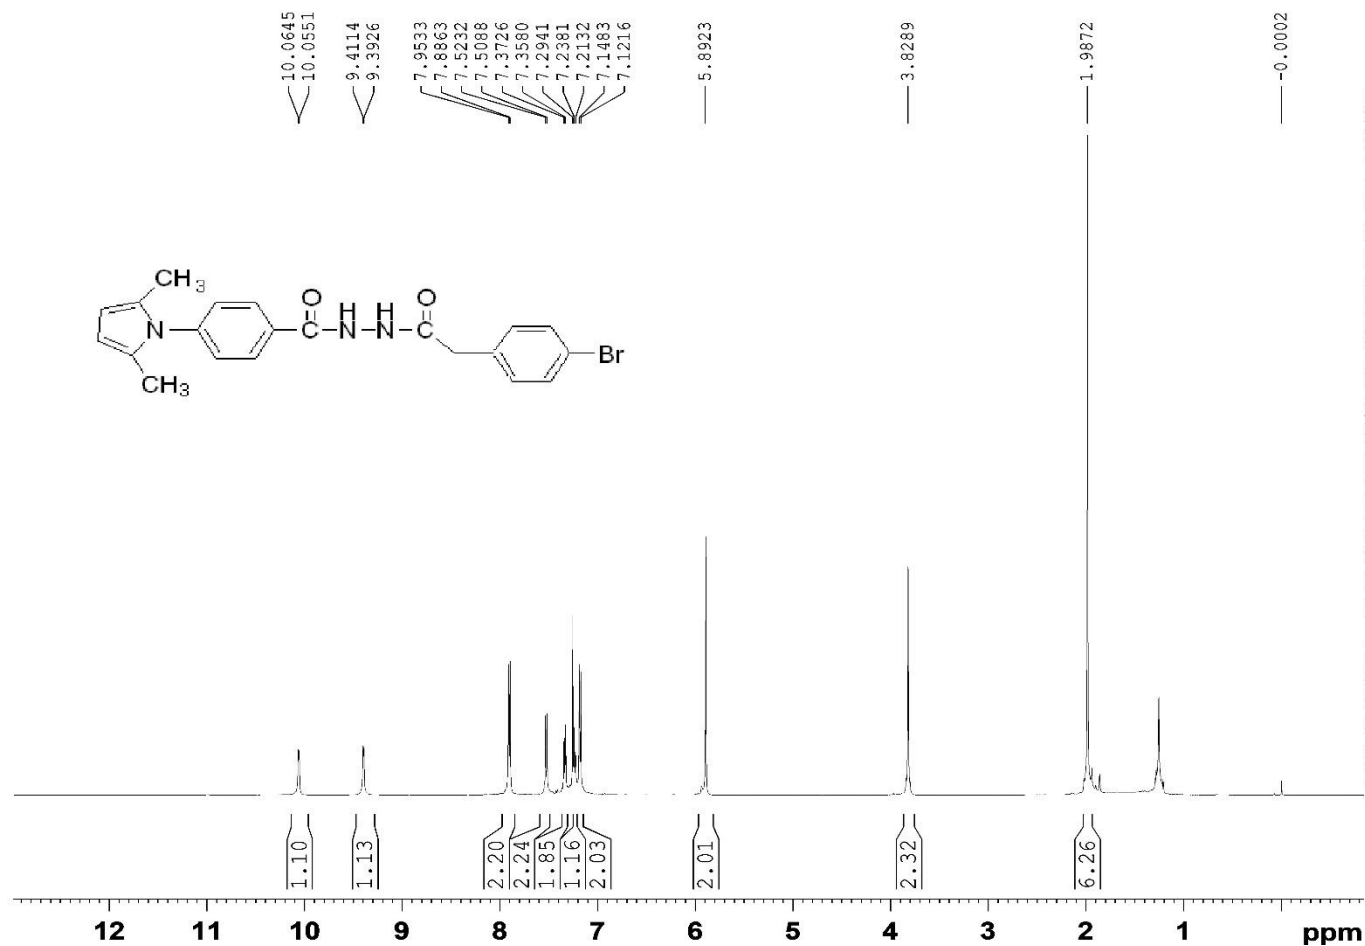

BRUKER  
AVANCE NEO  
500 MHz NMR  
SPECTROMETER  
SAIF, P.U.

Current Data Parameters  
NAME Mar03-2023-nmr  
EXPNO 10  
PROCNO 1

F2 - Acquisition Parameters  
Date\_ 20230303  
Time\_ 10.07 h  
INSTRUM Avance Neo 500  
PROBHD Z119470\_0333 (zg30  
PULPROG 65536  
TD 65536  
SOLVENT CDC13  
NS 16  
DS 0  
SWH 14705.883 Hz  
FIDRES 0.448788 Hz  
AQ 2.2282240 sec  
RG 95.7854  
DW 34.000 usec  
DE 6.79 usec  
TE 300.1 K  
D1 1.00000000 sec  
TD0 1  
SFO1 500.1730885 MHz  
NUC1 1H  
P0 3.33 usec  
P1 10.00 usec  
PLW1 20.93000031 W

F2 - Processing parameters  
SI 65536  
SF 500.1700148 MHz  
WDW EM  
SSB 0  
LB 0.30 Hz  
GB 0  
PC 1.00

SPECTRUM NO: 35 ( $^{13}\text{C}$  NMR spectrum of Compound 5i)

4Br3i  
Cl3CPD DMSO {D:\Spectra} nmr 22

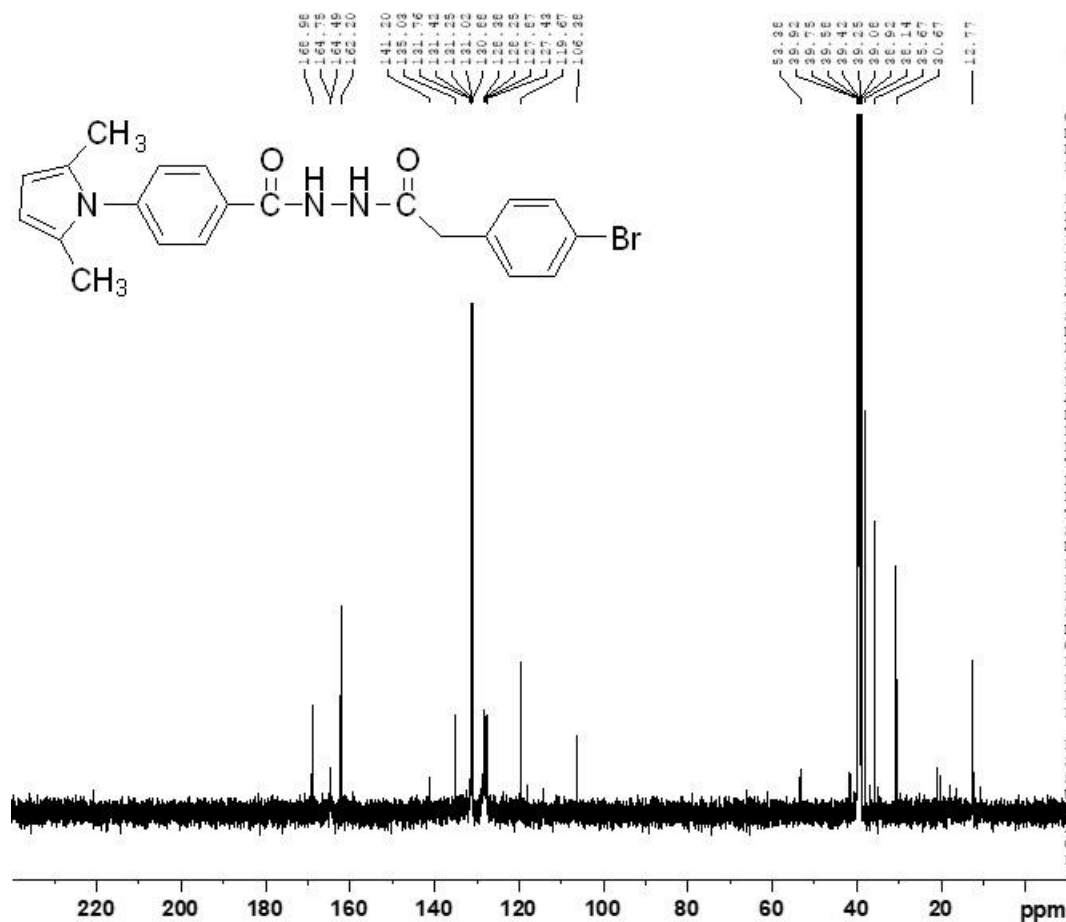

BRUKER  
AVANCE NEO  
500 MHz NMR SPECTROMETER  
SAIF, PANJAB UNIVERSITY,  
CHANDIGARH

Current Data Parameters  
NAME Mar03-2023  
EXPNO 220  
PROCNO 1

F2 - Acquisition Parameters  
Date\_ 20230303  
Time 23.19 h  
INSTRUM Avance Neo 500  
PROBHD Z119470\_0323 (4  
PULPROG zgpg30  
TD 65536  
SOLVENT DMSO  
NS 512  
DS 4  
SWH 37037.035 Hz  
FIDRES 1.130281 Hz  
AQ 0.8847260 sec  
RG 101  
DW 13.500 usec  
DE 6.50 usec  
TE 300.1 K  
D1 2.00000000 sec  
D11 0.03000000 sec  
TD0 1  
SFO1 125.7804233 MHz  
NUC1 13C  
P0 3.32 usec  
P1 10.00 usec  
PLW1 83.14099884 W  
SFO2 500.1720007 MHz  
NUC2 1H  
CPDPRG[2] waltz65  
PCPD2 80.00 usec  
PLW2 20.93000031 W  
PLW12 0.32703000 W  
PLW13 0.16449000 W

F2 - Processing parameters  
SI 32768  
SF 125.7679191 MHz  
WDW EM  
SSE 0  
LB 1.00 Hz  
GB 0  
PC 1.40

SPECTRUM NO: 36 (Mass spectrum of Compound 5i)

230114-4Br 3i 91 (3.081)

1: TOF MS ES+  
3.68e5

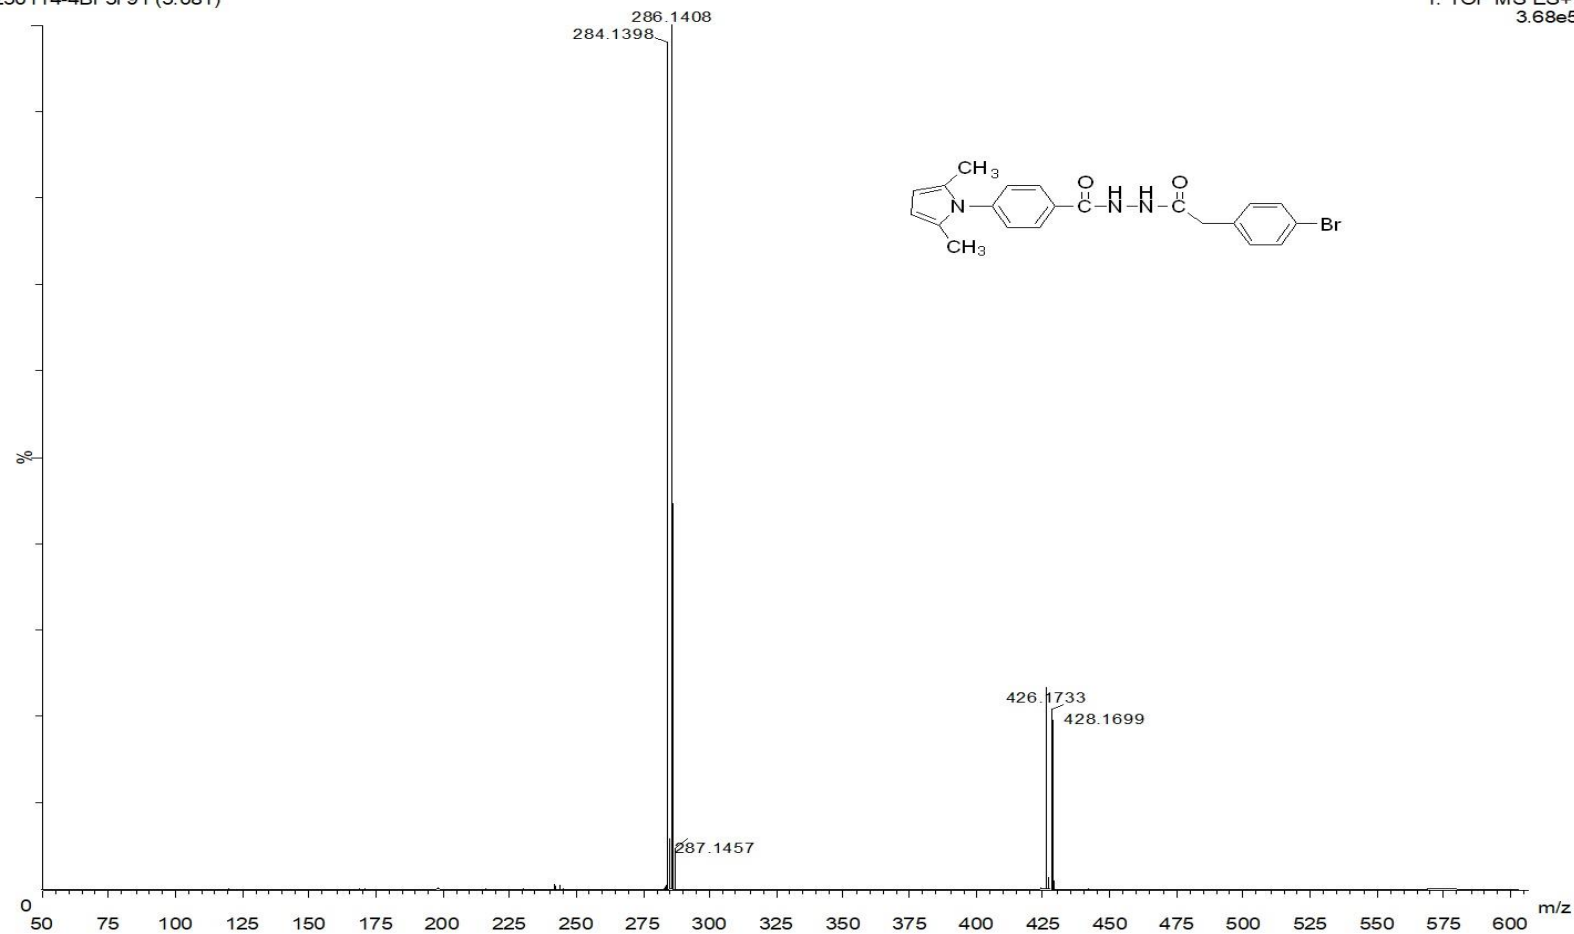

SPECTRUM NO: 37 (IR spectrum of Compound 5j)

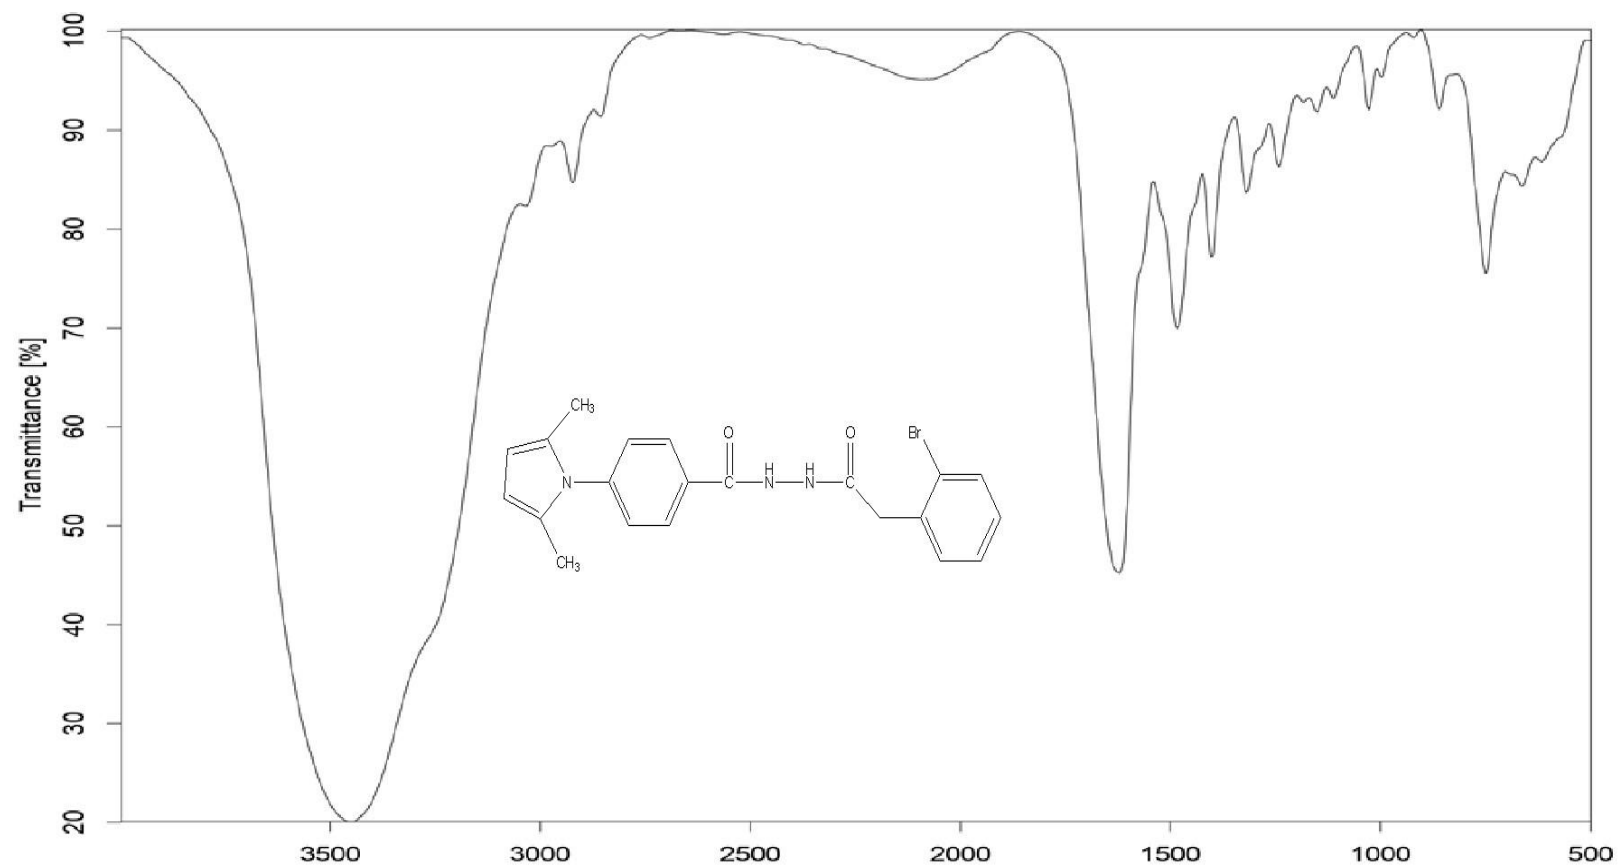

SPECTRUM NO: 38 (<sup>1</sup>H NMR spectrum of Compound 5j)

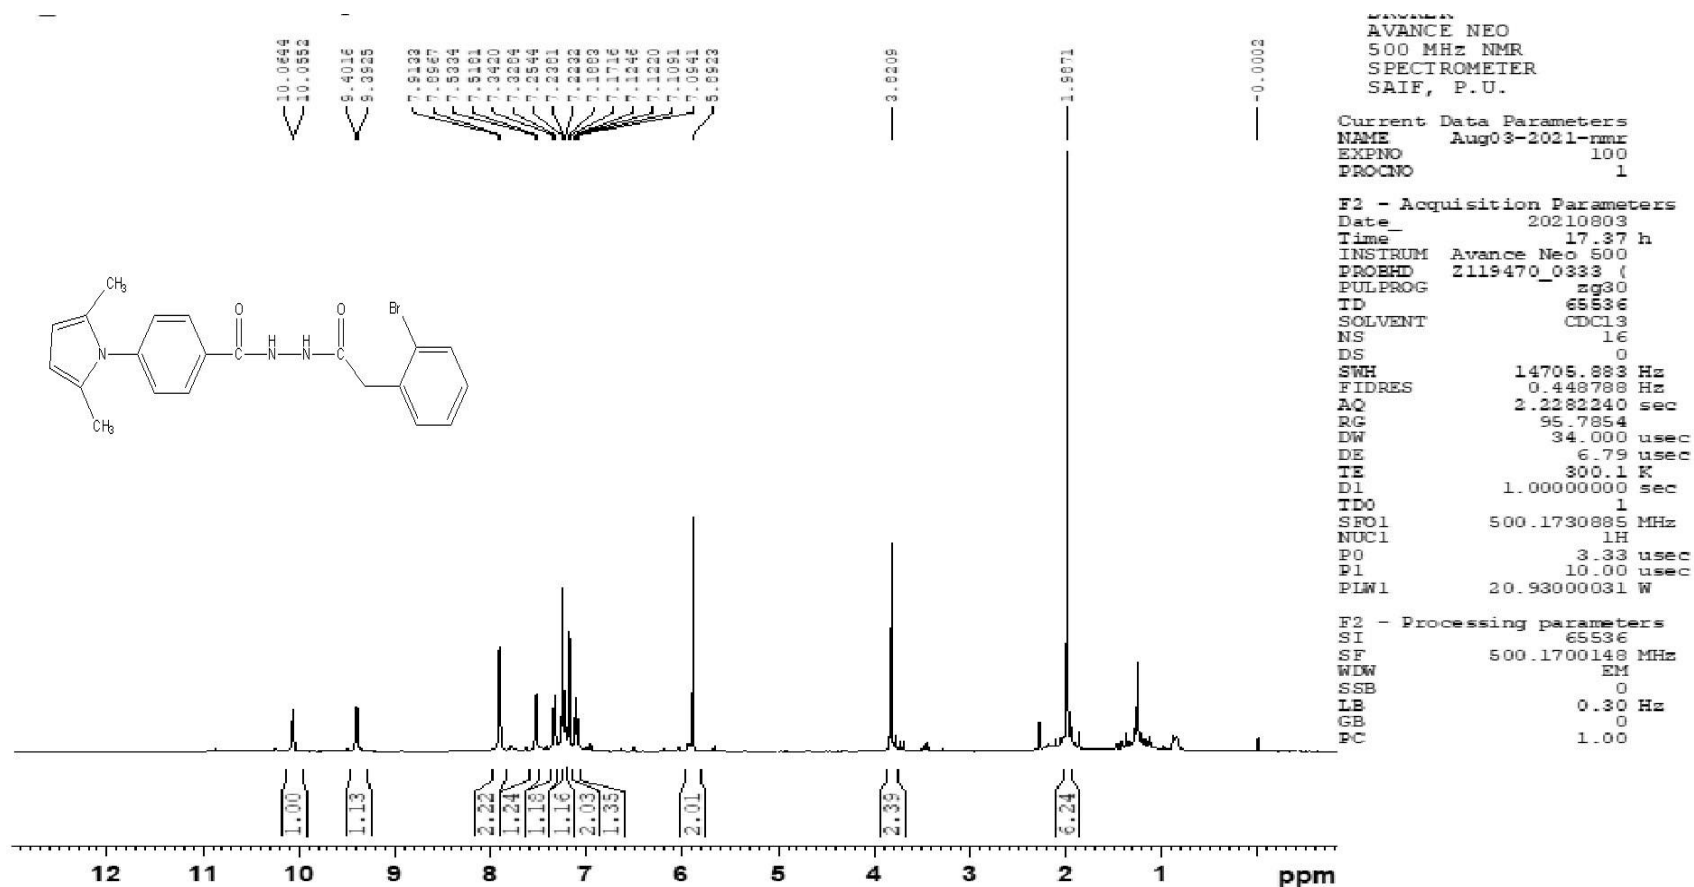

SPECTRUM NO: 39 (<sup>13</sup>C NMR spectrum of Compound 5j)

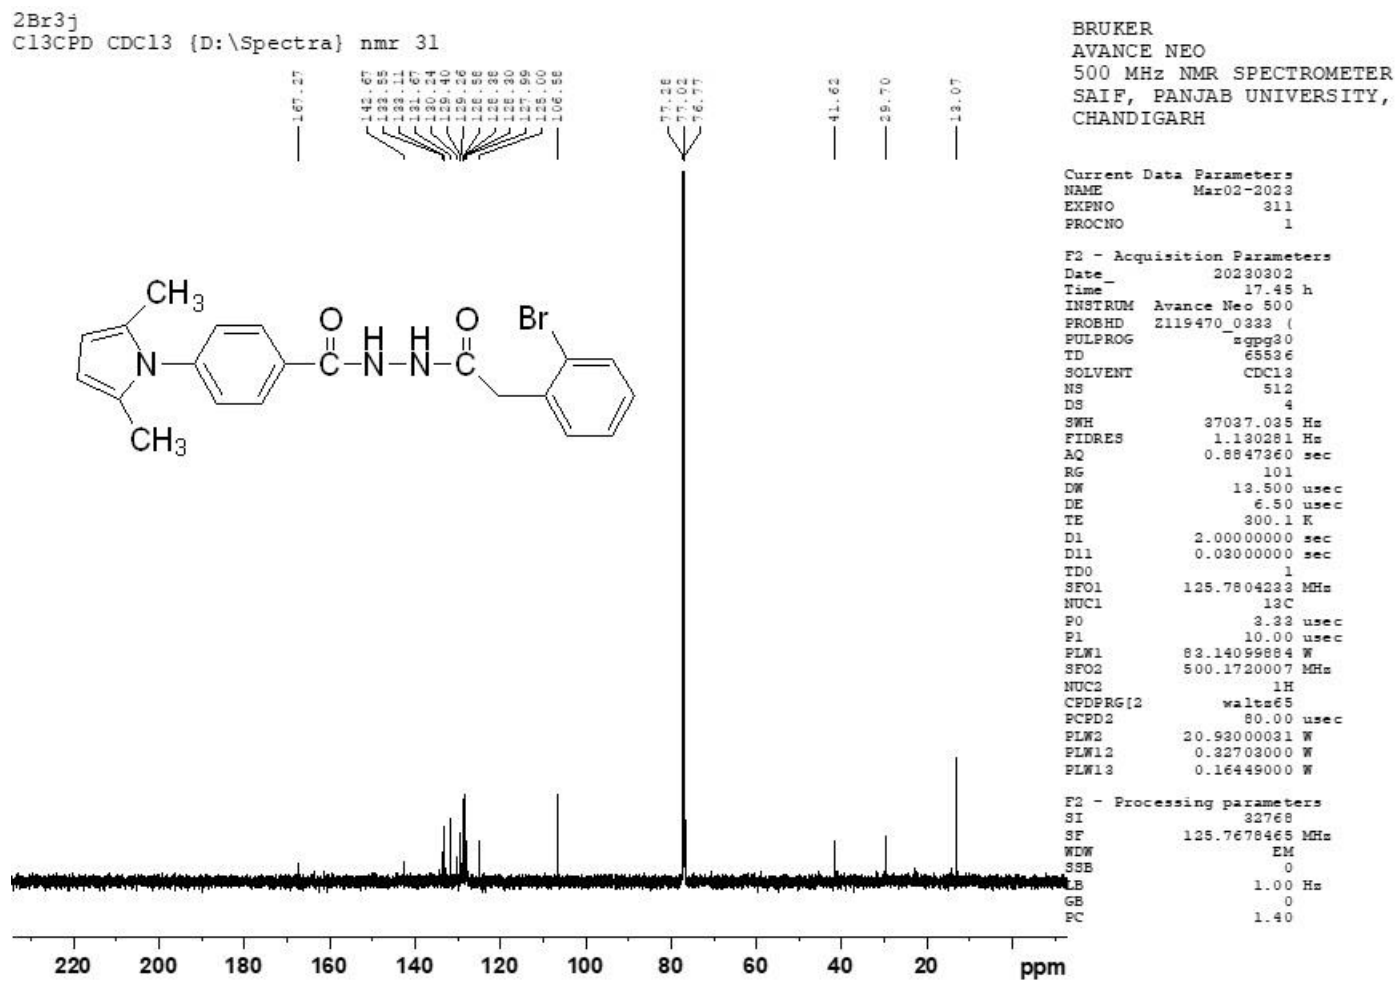

SPECTRUM NO: 40 (Mass spectrum of Compound 5j)

230110-2Br 3J 90 (3.047)

1: TOF MS ES+  
3.61e5

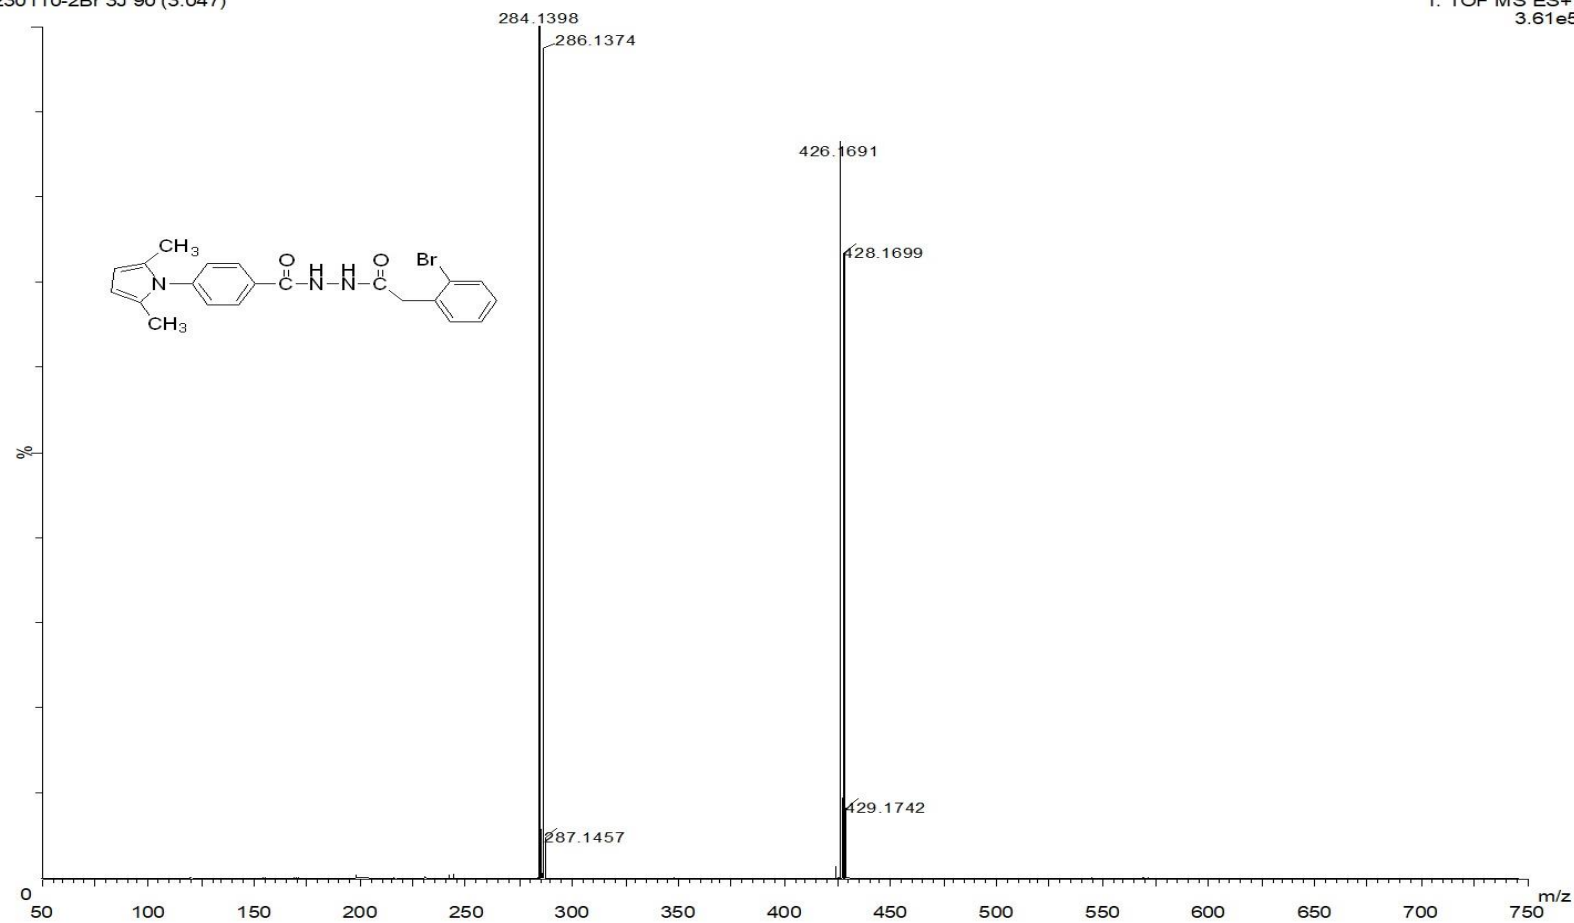



SPECTRUM NO: 41 (IR spectrum of Compound 5k)

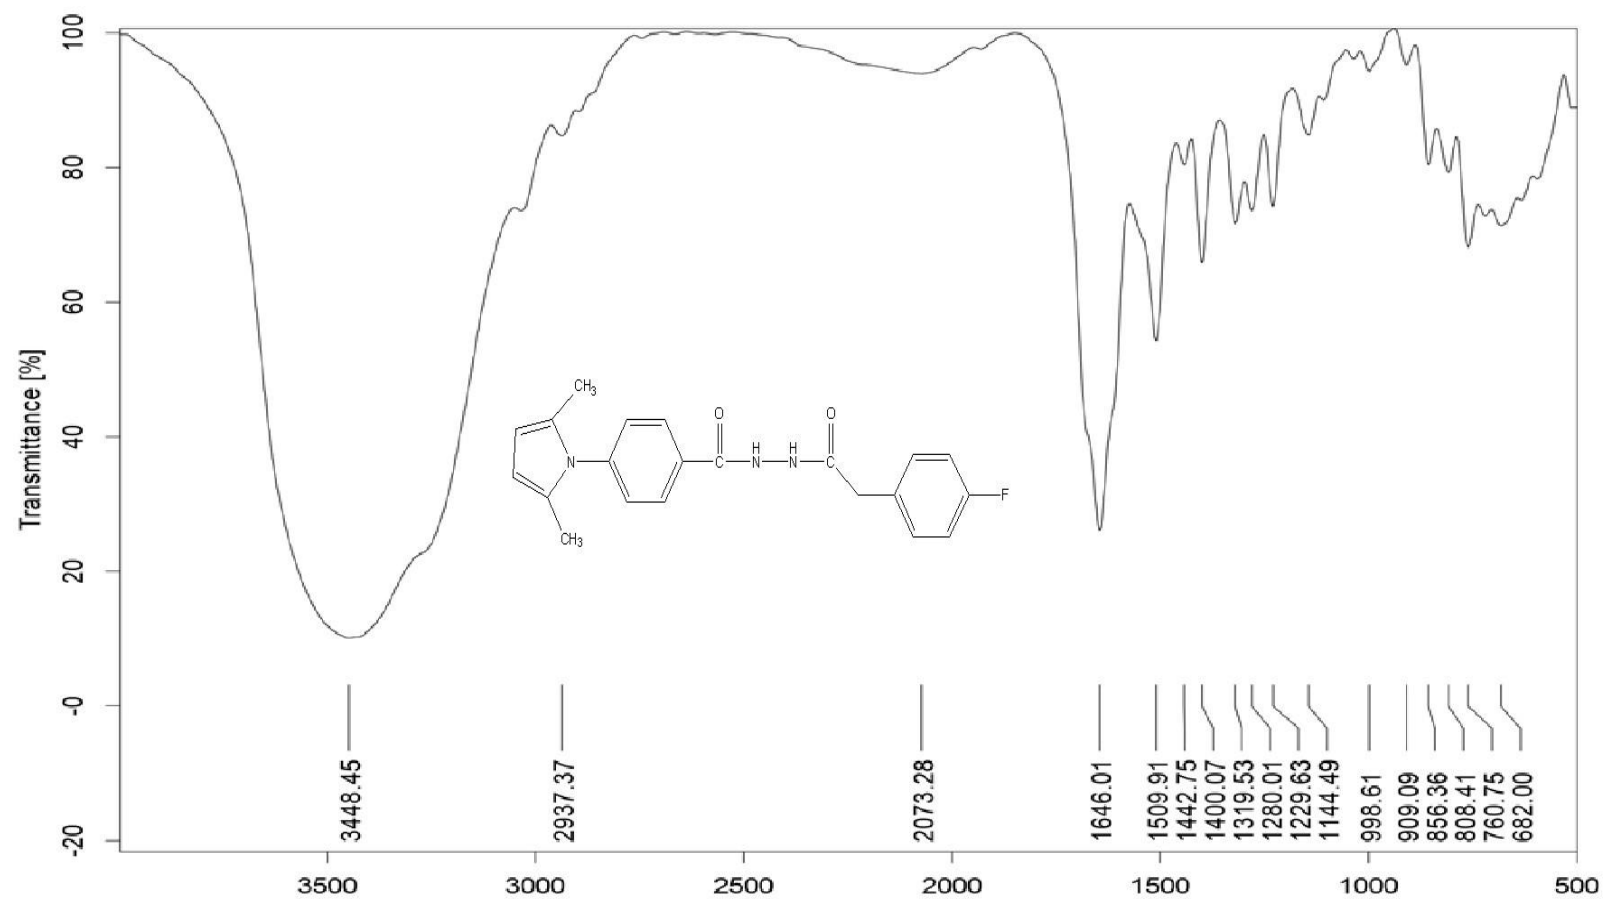

SPECTRUM NO: 42 (<sup>1</sup>H NMR spectrum of Compound 5k)

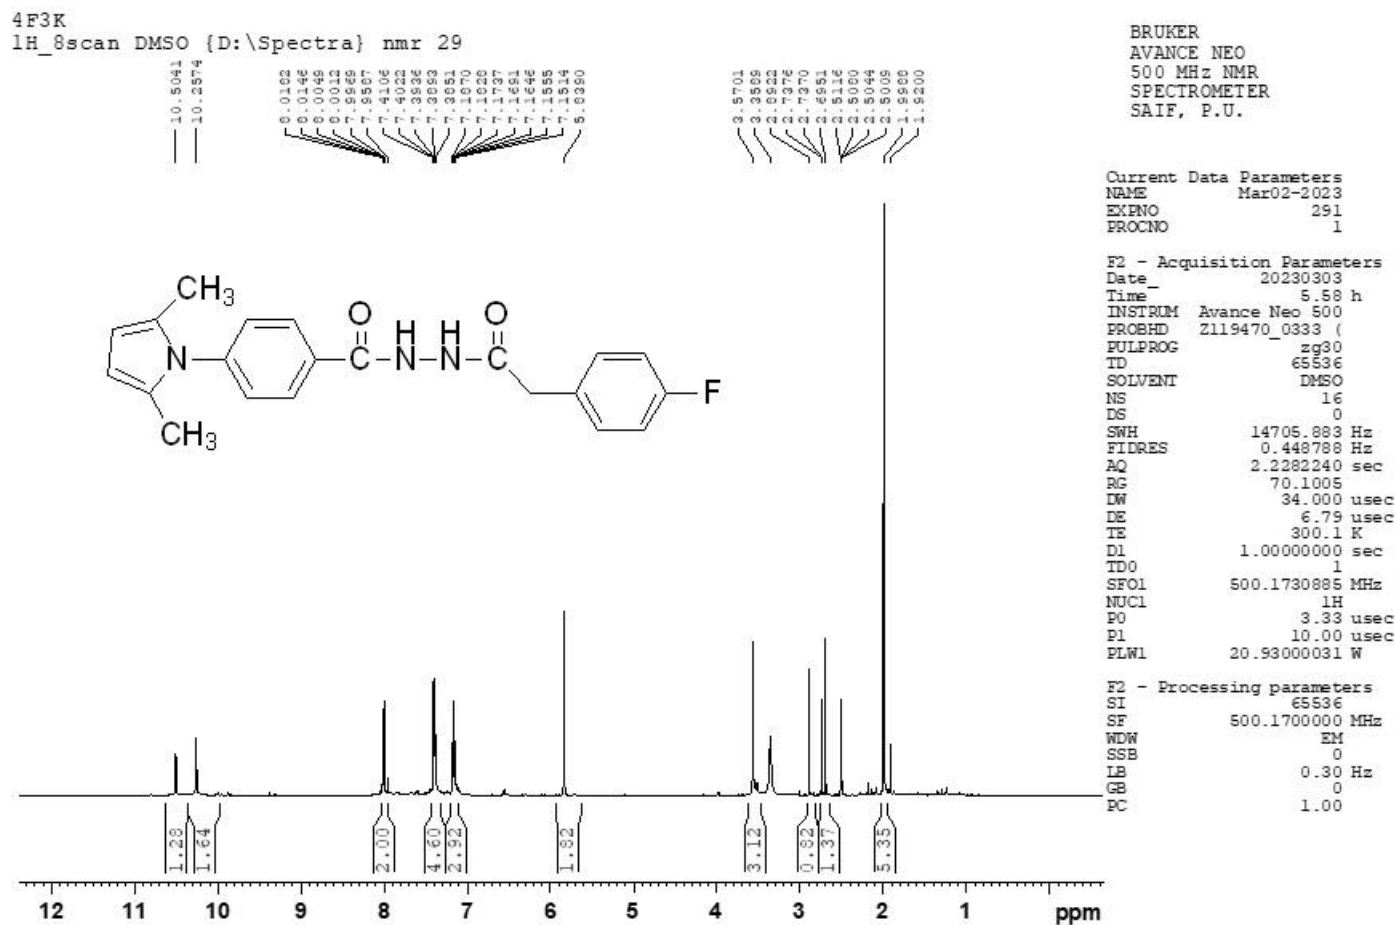

SPECTRUM NO: 43 ( $^{13}\text{C}$  NMR spectrum of Compound 5k)

4F-5K  
C13CPD CDCl3 {D:\Spectra} nmr 53

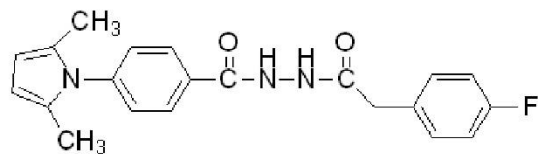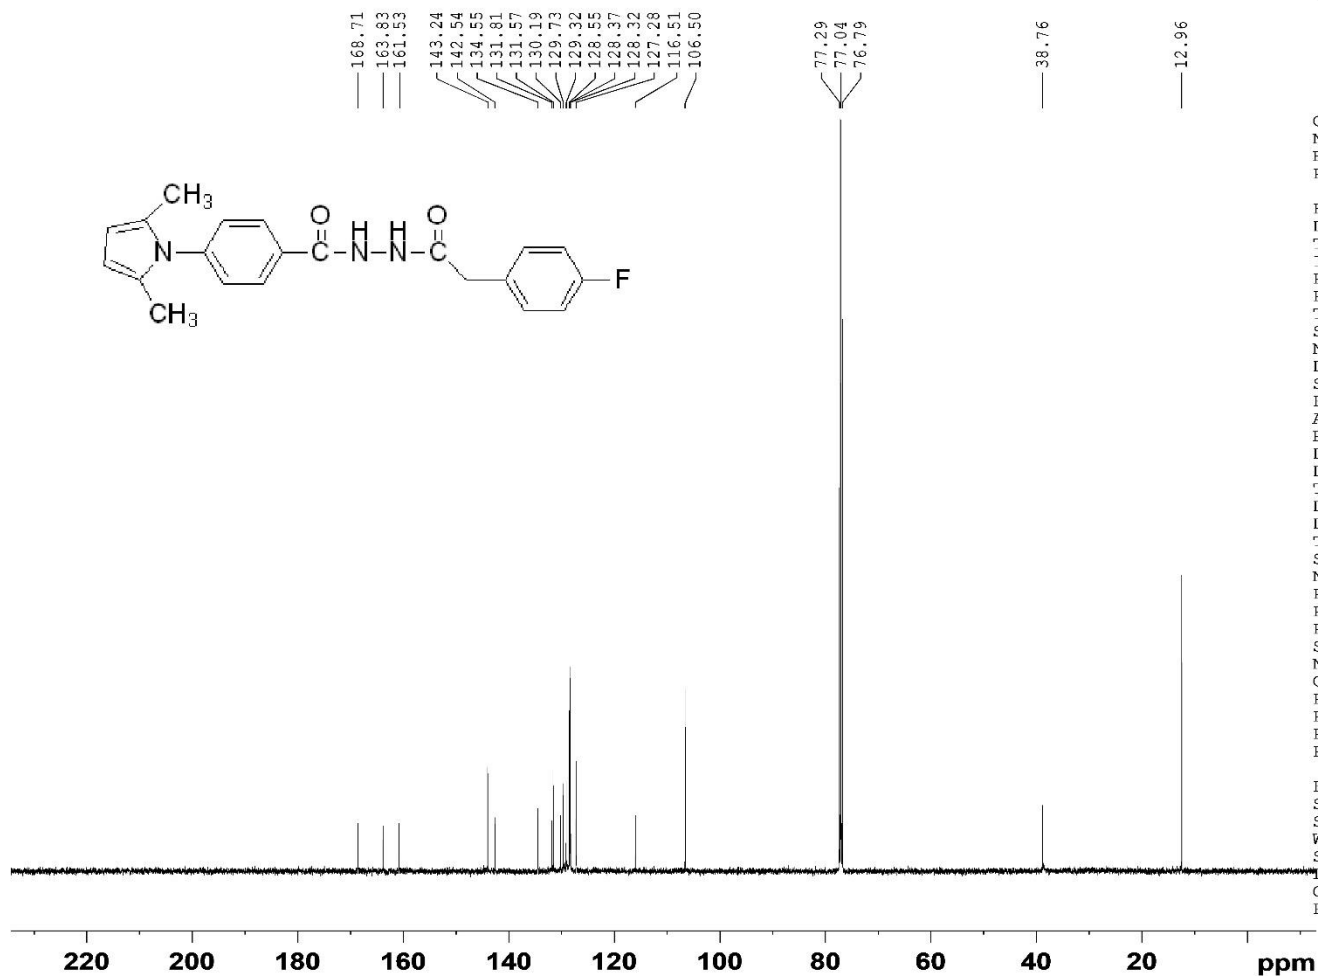

BRUKER  
AVANCE NEO  
500 MHz NMR SPECTROMETER  
SAIF, PANJAB UNIVERSITY,  
CHANDIGARH

Current Data Parameters  
NAME Mar30-2023  
EXPNO 01  
PROCNO 1

F2 - Acquisition Parameters  
Date\_ 20230330  
Time\_ 10.18 h  
INSTRUM Avance Neo 500  
PROBHD Z119470\_0333 (zpgpg30)  
TD 65536  
SOLVENT CDCl3  
NS 512  
DS 4  
SWH 37037.035 Hz  
FIDRES 1.130281 Hz  
AQ 0.8847360 sec  
RG 101  
DW 13.500 usec  
DE 6.50 usec  
TE 300.1 K  
D1 2.00000000 sec  
D11 0.03000000 sec  
TD0 1  
SFO1 125.7804233 MHz  
NUC1 13C  
P0 3.33 usec  
P1 10.00 usec  
PLW1 83.14099884 W  
SFO2 500.1720007 MHz  
NUC2 1H  
CPDPRG[2] waltz65  
PCPD2 80.00 usec  
PLW2 20.93000031 W  
PLW12 0.32703000 W  
PLW13 0.16449000 W

F2 - Processing parameters  
SI 32768  
SF 125.7678465 MHz  
WDW EM  
SSB 0  
LB 1.00 Hz  
GB 0  
PC 1.40

SPECTRUM NO: 44 (Mass spectrum of Compound 5k)

230112-4F 3K 87 (2.946)

1: TOF MS ES+  
1.34e6

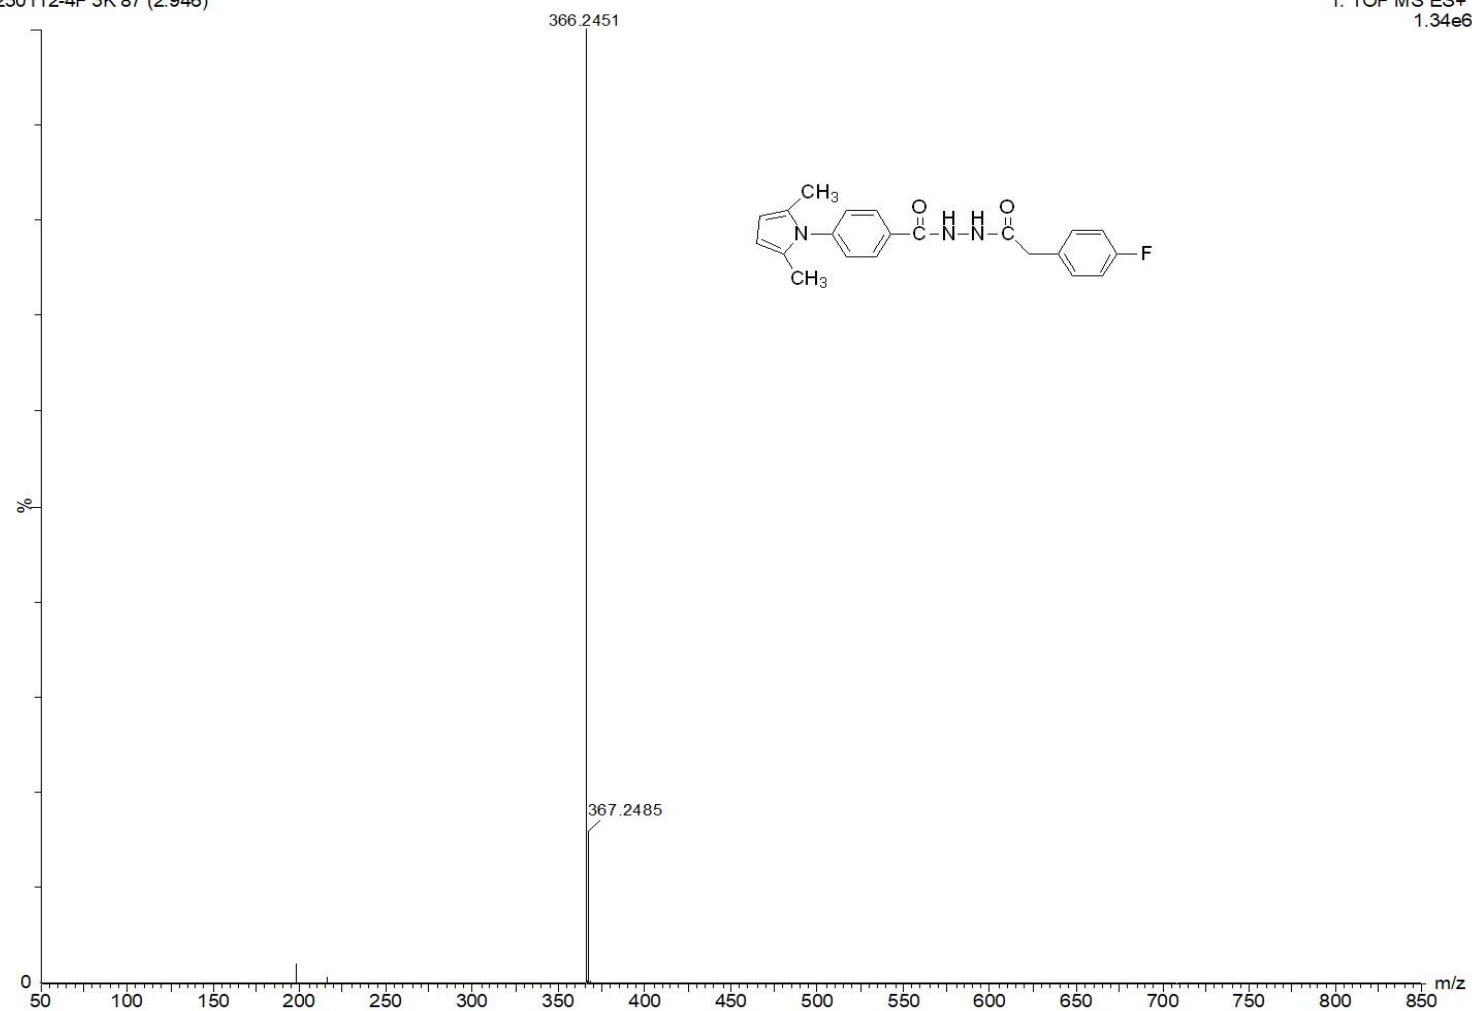

SPECTRUM NO: 45 (IR spectrum of Compound 5l)

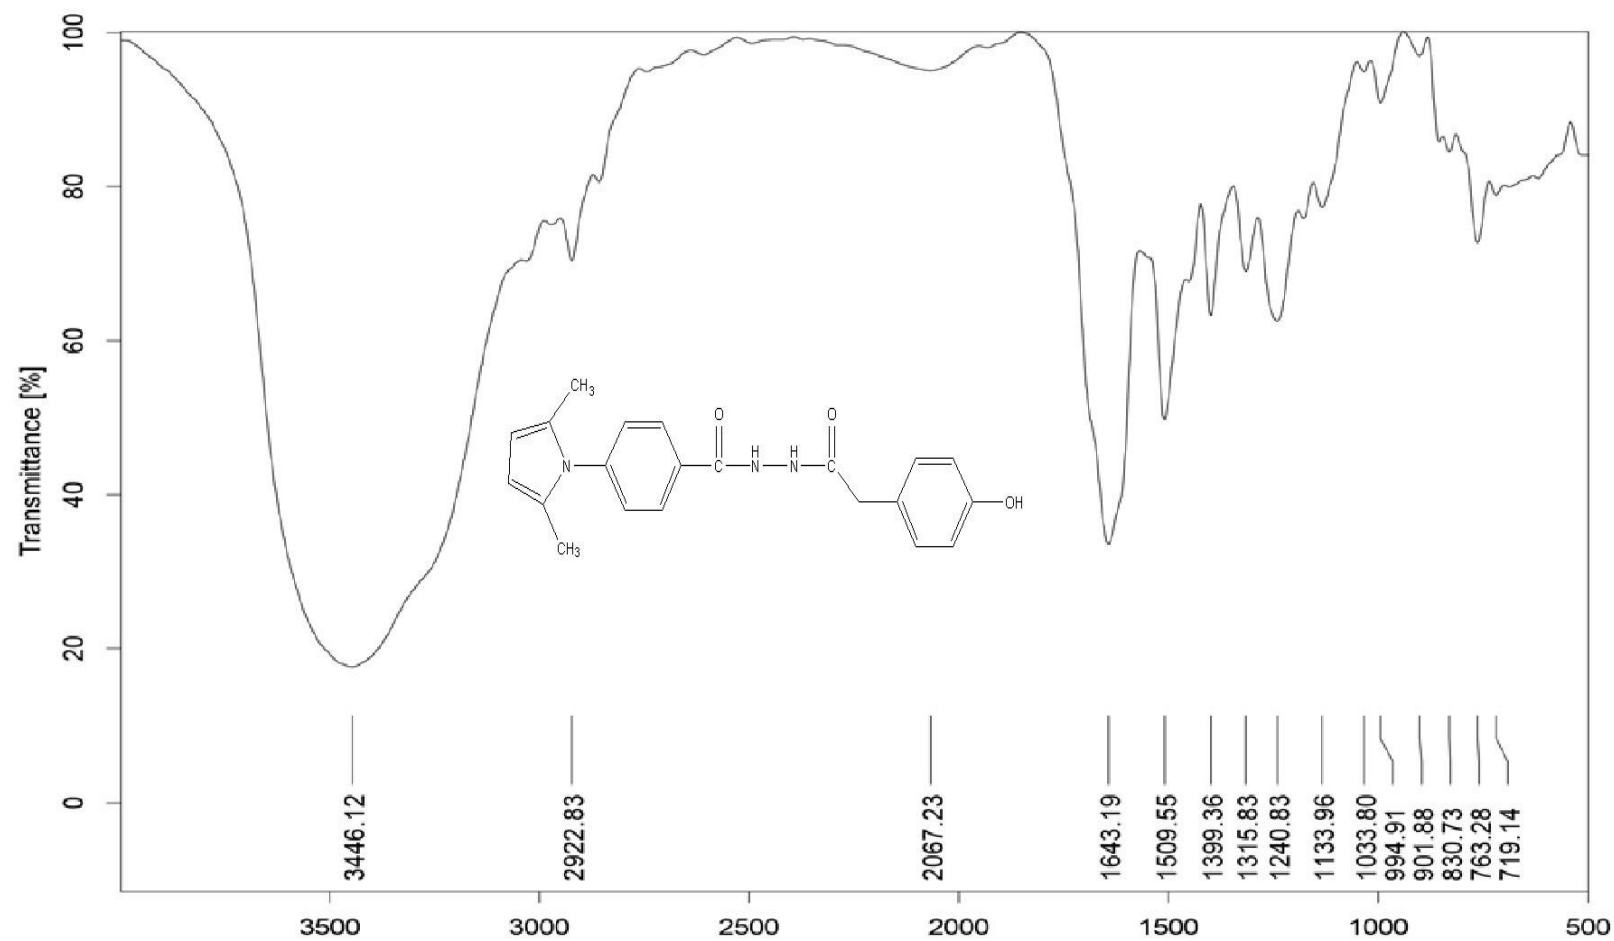

SPECTRUM NO: 46 (<sup>1</sup>H NMR spectrum of Compound 5l)

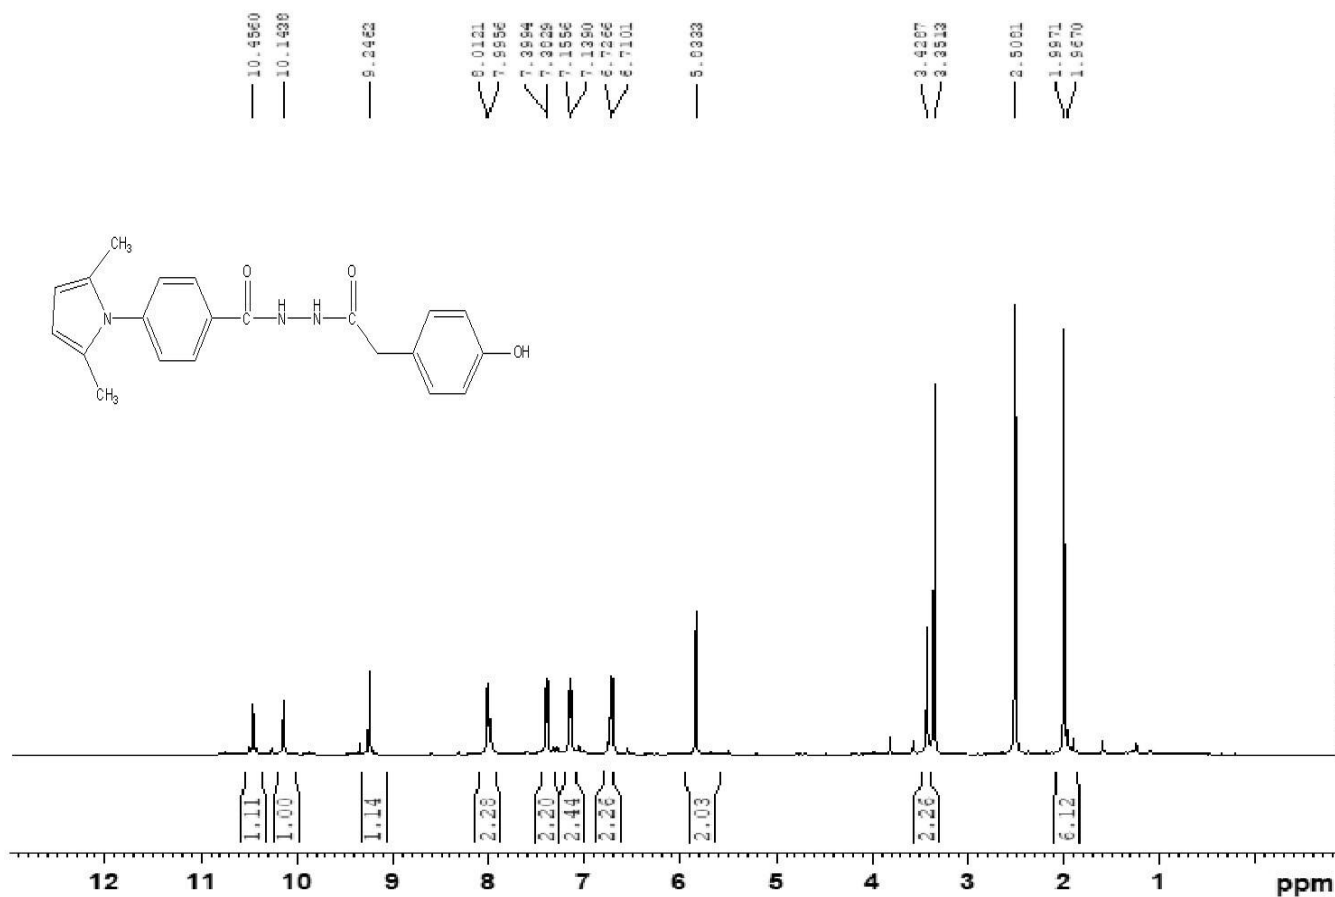

AVANCE NEO  
500 MHz NMR  
SPECTROMETER  
SAIF, P.U.

Current Data Parameters  
NAME Aug03-2021-nmr  
EXPNO 110  
PROCNO 1

F2 - Acquisition Parameters  
Date\_ 20210803  
Time\_ 17.41 h  
INSTRUM Avance Neo 500  
PROBHD Z119470\_0333 (   
PULPROG zg30  
TD 65536  
SOLVENT DMSO  
NS 16  
DS 0  
SWH 14705.883 Hz  
FIDRES 0.448788 Hz  
AQ 2.2282240 sec  
RG 95.7854  
DW 34.000 usec  
DE 6.79 usec  
TE 300.1 K  
D1 1.00000000 sec  
TD0 1  
SFO1 500.1730885 MHz  
NUC1 1H  
P0 3.33 usec  
P1 10.00 usec  
PLW1 20.93000031 W

F2 - Processing parameters  
SI 65536  
SF 500.1700000 MHz  
WDW EM  
SSB 0  
LB 0.30 Hz  
GB 0  
PC 1.00

SPECTRUM NO: 47 (<sup>13</sup>C NMR spectrum of Compound 5l)

4OH-5L

C13CPD CDCl3 {D:\Spectra} nmr 54

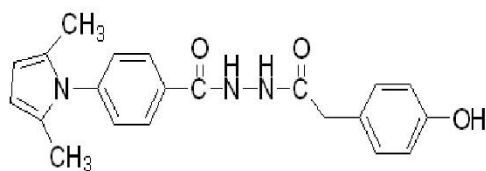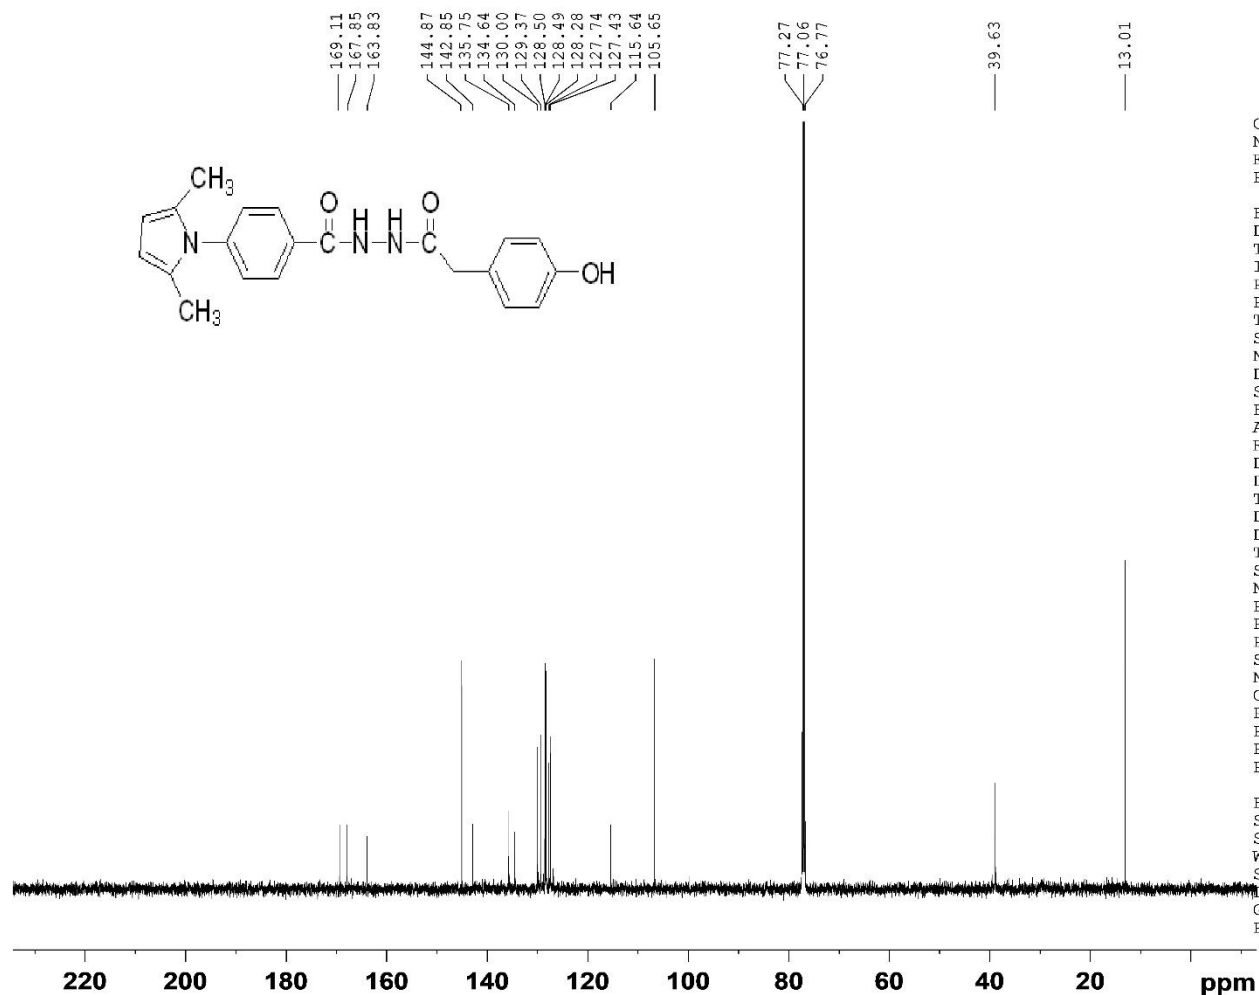

BRUKER  
AVANCE NEO  
500 MHz NMR SPECTROMETER  
SAIF, PANJAB UNIVERSITY,  
CHANDIGARH

Current Data Parameters  
NAME Mar30-2023  
EXPNO 02  
PROCNO 1

F2 - Acquisition Parameters  
Date 20230330  
Time 13.12 h  
INSTRUM Avance Neo 500  
PROBHD z119470\_0333 (   
PULPROG zgpg30  
TD 65536  
SOLVENT CDCl3  
NS 512  
DS 4  
SWH 37037.035 Hz  
FIDRES 1.130281 Hz  
AQ 0.8847360 sec  
RG 101  
DW 13.500 usec  
DE 6.50 usec  
TE 300.1 K  
D1 2.00000000 sec  
D11 0.03000000 sec  
TD0 1  
SFO1 125.7804233 MHz  
NUC1 13C  
P0 3.33 usec  
P1 10.00 usec  
PLW1 83.14099884 W  
SFO2 500.1720007 MHz  
NUC2 1H  
CPDPRG[2] waltz65  
PCPD2 80.00 usec  
PLW2 20.93000031 W  
PLW12 0.32703000 W  
PLW13 0.16449000 W

F2 - Processing parameters  
SI 32768  
SF 125.7678465 MHz  
WDW EM  
SSB 0  
LB 1.00 Hz  
GB 0  
PC 1.40

SPECTRUM NO: 48 (Mass spectrum of Compound 5l)

230102-4F 3L 87 (2.946)

1: TOF MS ES+  
3.34e6

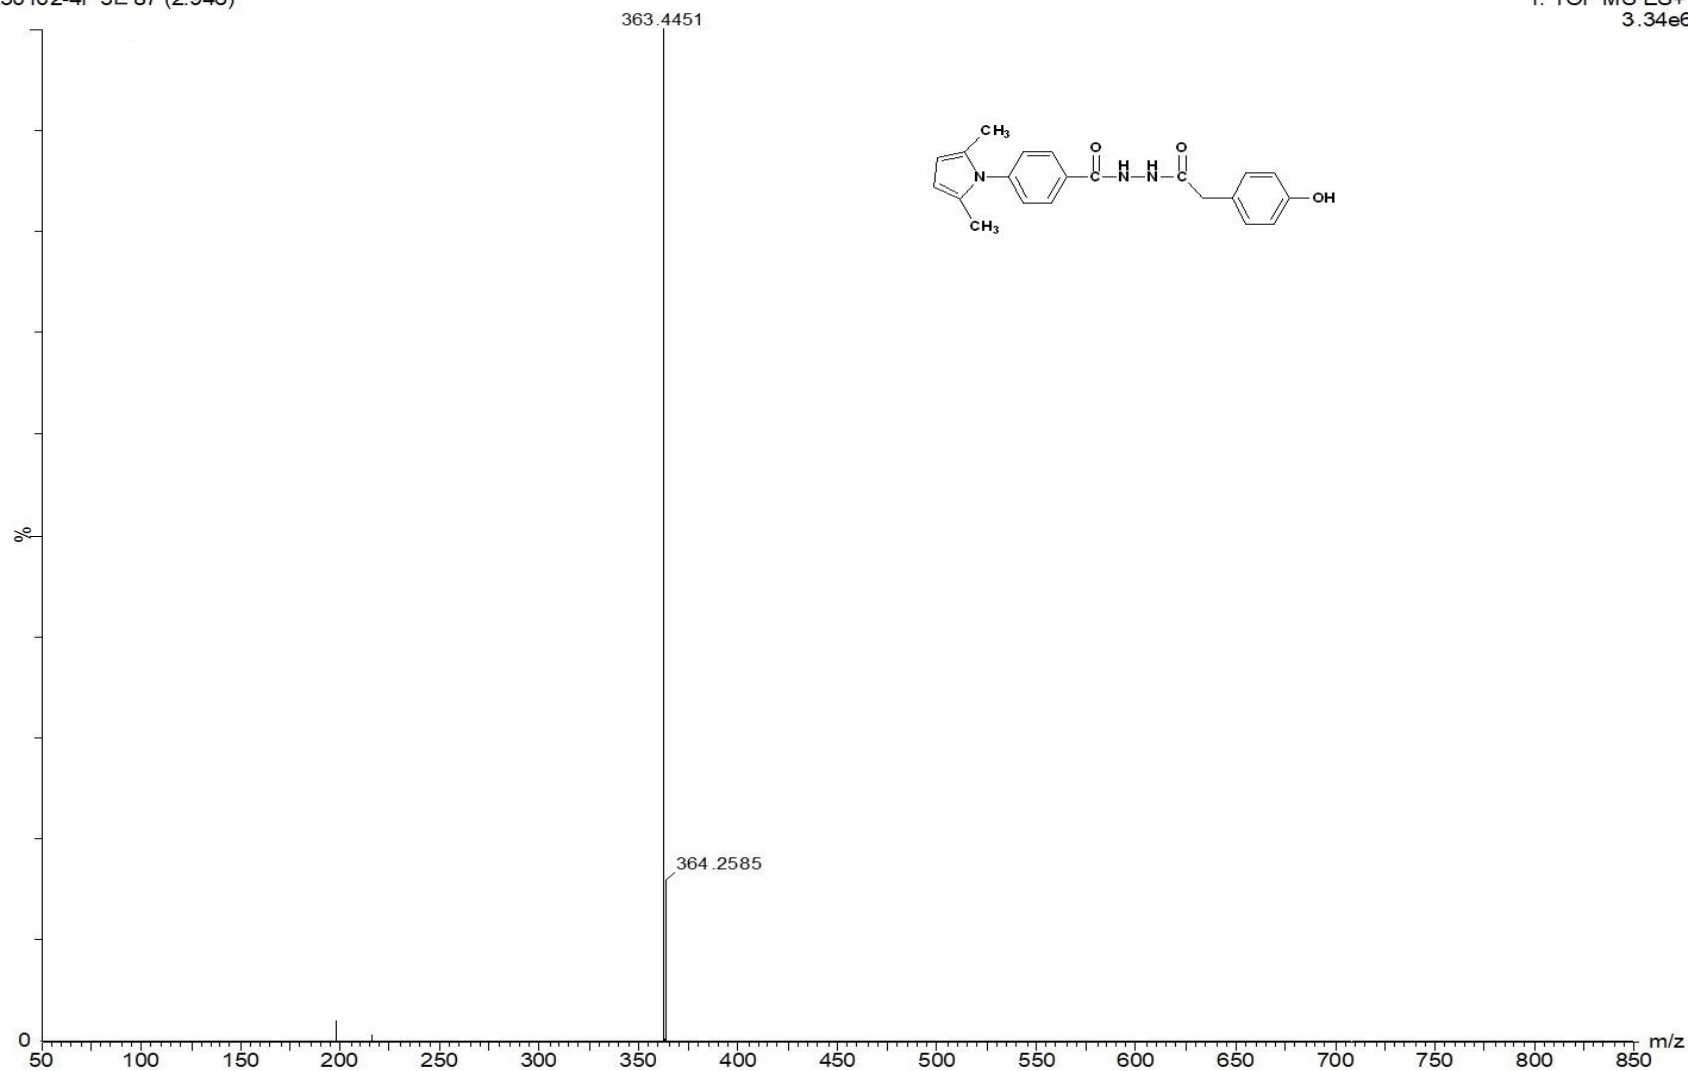



SPECTRUM NO: 49 (IR spectrum of Compound 5m)

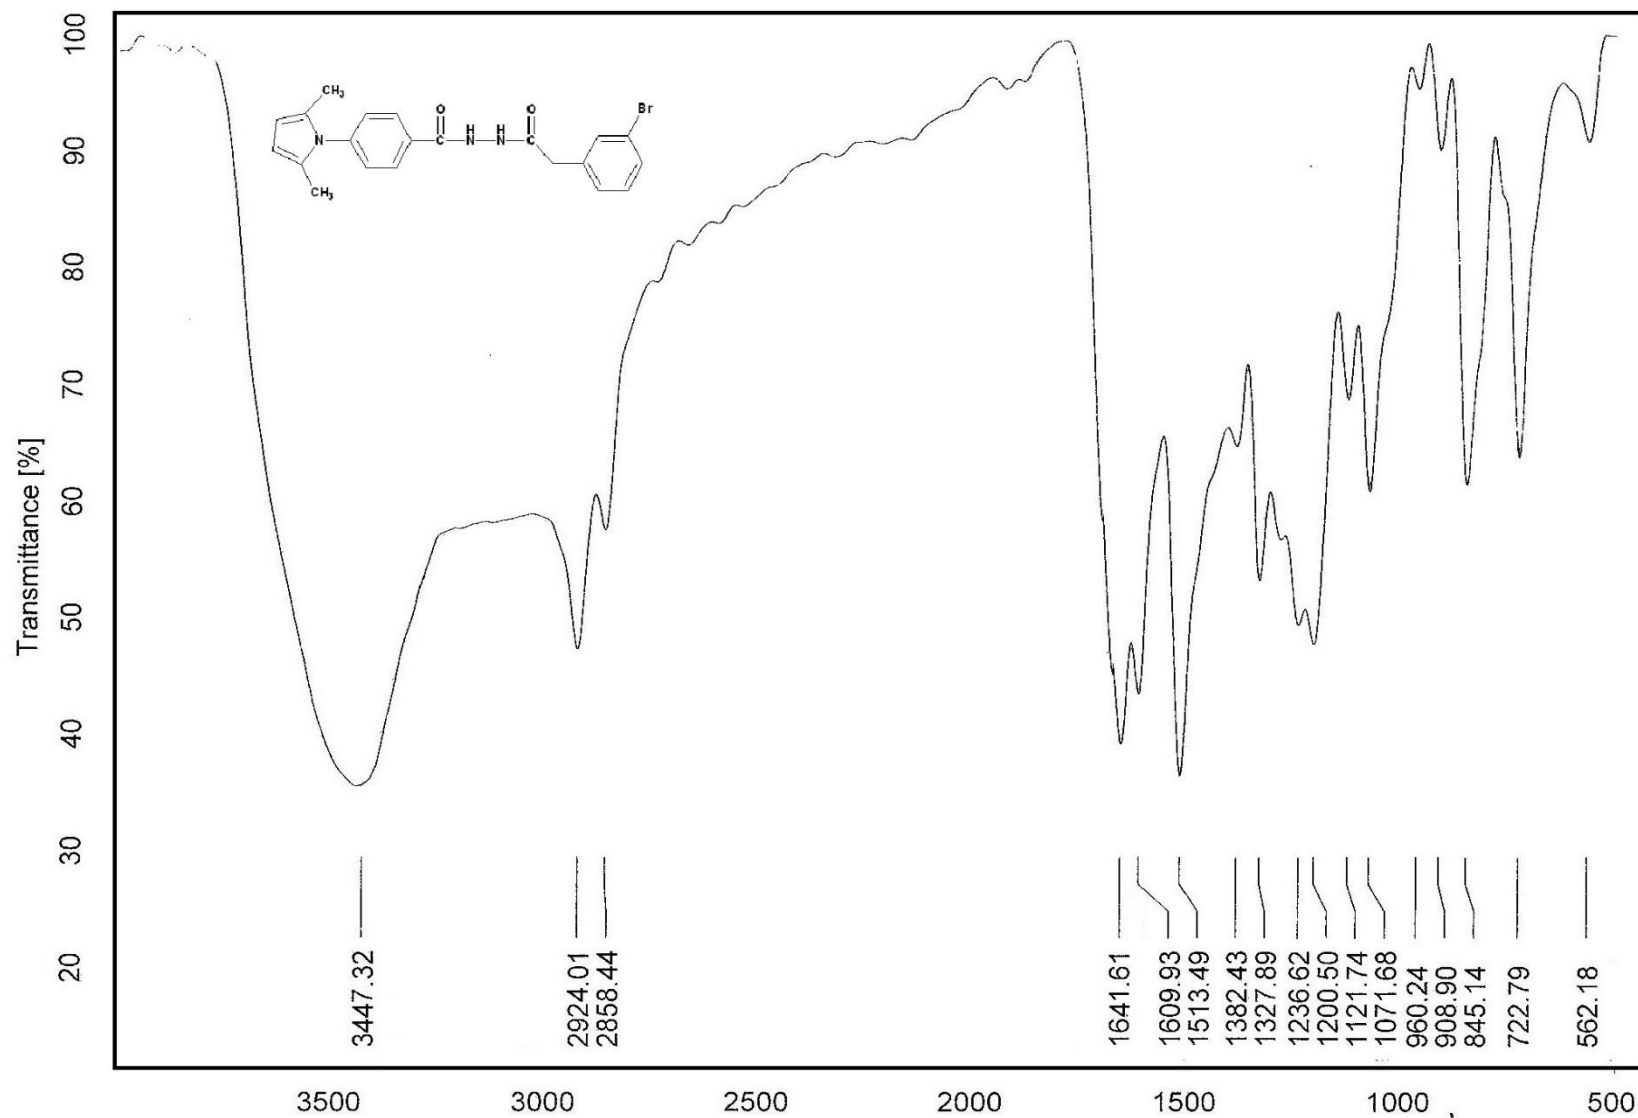

SPECTRUM NO: 50 (<sup>1</sup>H NMR spectrum of Compound 5m)

1H\_8scan CDC13 {D:\Spectra} nmr 111

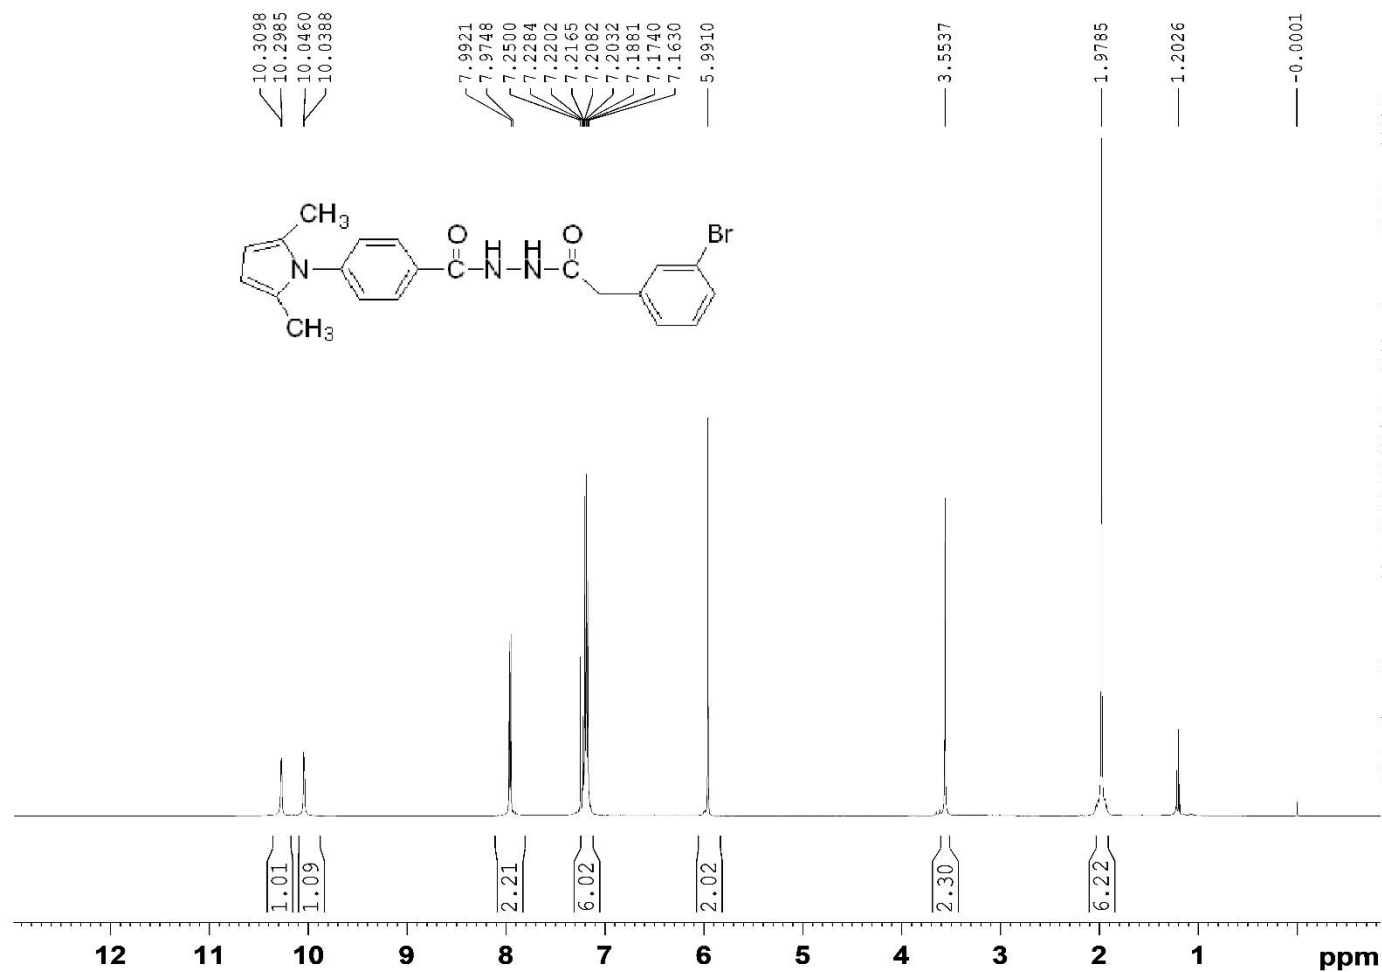

BRUKER  
AVANCE NEO  
500 MHz NMR  
SPECTROMETER  
SAIF, P.U.

Current Data Parameters  
NAME Mar03-2023-nmr  
EXPNO 11  
PROCNO 1

F2 - Acquisition Parameters  
Date\_ 20230303  
Time\_ 11.28 h  
INSTRUM Avance Neo 500  
PROBHD Z119470\_0333 (zg30)  
PULPROG zg30  
TD 65536  
SOLVENT CDC13  
NS 16  
DS 0  
SWH 14705.883 Hz  
FIDRES 0.448788 Hz  
AQ 2.2282240 sec  
RG 59.6374  
DW 34.000 usec  
DE 6.79 usec  
TE 300.2 K  
D1 1.00000000 sec  
TD0 1  
SFO1 500.1730885 MHz  
NUC1 1H  
P0 3.33 usec  
P1 10.00 usec  
PLW1 20.93000031 W

F2 - Processing parameters  
SI 65536  
SF 500.1700170 MHz  
WDW EM  
SSB 0  
LB 0.30 Hz  
GB 0  
PC 1.00

SPECTRUM NO: 51 (<sup>13</sup>C NMR spectrum of Compound 5m)

3Br-5M

C13CPD CDCl3 {D:\Spectra} nmr 55

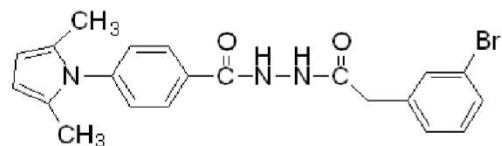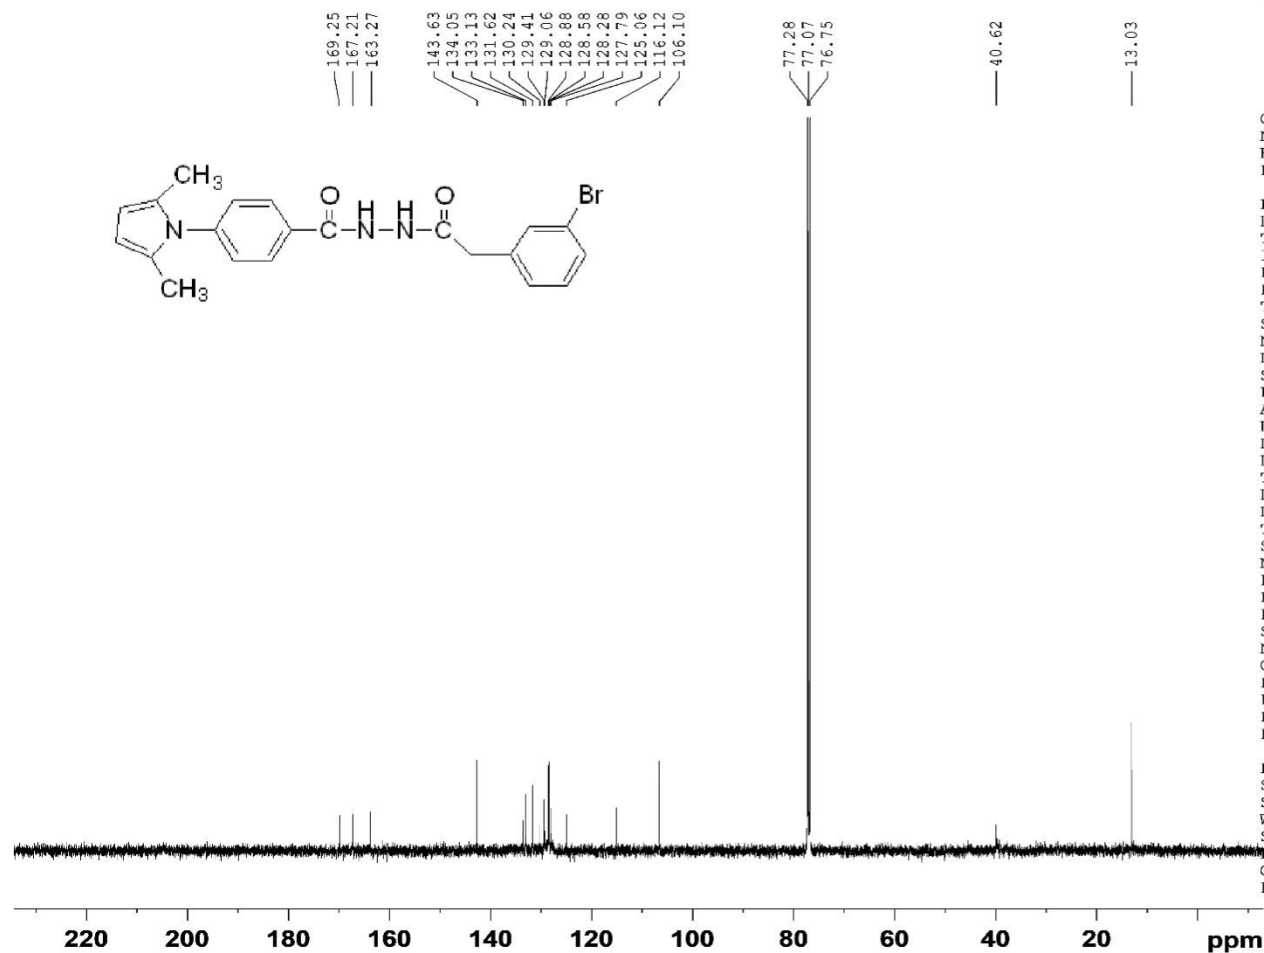

BRUKER  
AVANCE NEO  
500 MHz NMR SPECTROMETER  
SAIF, PANJAB UNIVERSITY,  
CHANDIGARH

Current Data Parameters  
NAME Mar30-2023  
EXPNO 03  
PROCNO 1

F2 - Acquisition Parameters  
Date\_ 20230330  
Time\_ 15.55 h  
INSTRUM Avance Neo 500  
PROBHD Z119470\_0333 (   
PULPROG zgpg30  
TD 65536  
SOLVENT CDCl3  
NS 512  
DS 4  
SWH 37037.035 Hz  
FIDRES 1.130281 Hz  
AQ 0.8847360 sec  
RG 101  
DW 13.500 usec  
DE 6.50 usec  
TE 300.1 K  
D1 2.00000000 sec  
D11 0.03000000 sec  
TD0 1  
SFO1 125.7804233 MHz  
NUC1 13C  
P0 3.33 usec  
P1 10.00 usec  
PLW1 83.14099884 W  
SFO2 500.1720007 MHz  
NUC2 1H  
CPDPRG[2] waltz65  
PCPD2 80.00 usec  
PLW2 20.93000031 W  
PLW12 0.32703000 W  
PLW13 0.16449000 W

F2 - Processing parameters  
ST 32768  
SF 125.7678465 MHz  
WDW EM  
SSB 0  
LB 1.00 Hz  
GB 0  
PC 1.40

SPECTRUM NO: 52 (Mass spectrum of Compound 5m)

230110-3Br 3M 90 (3.047)

1: TOF MS ES+  
3.51e5

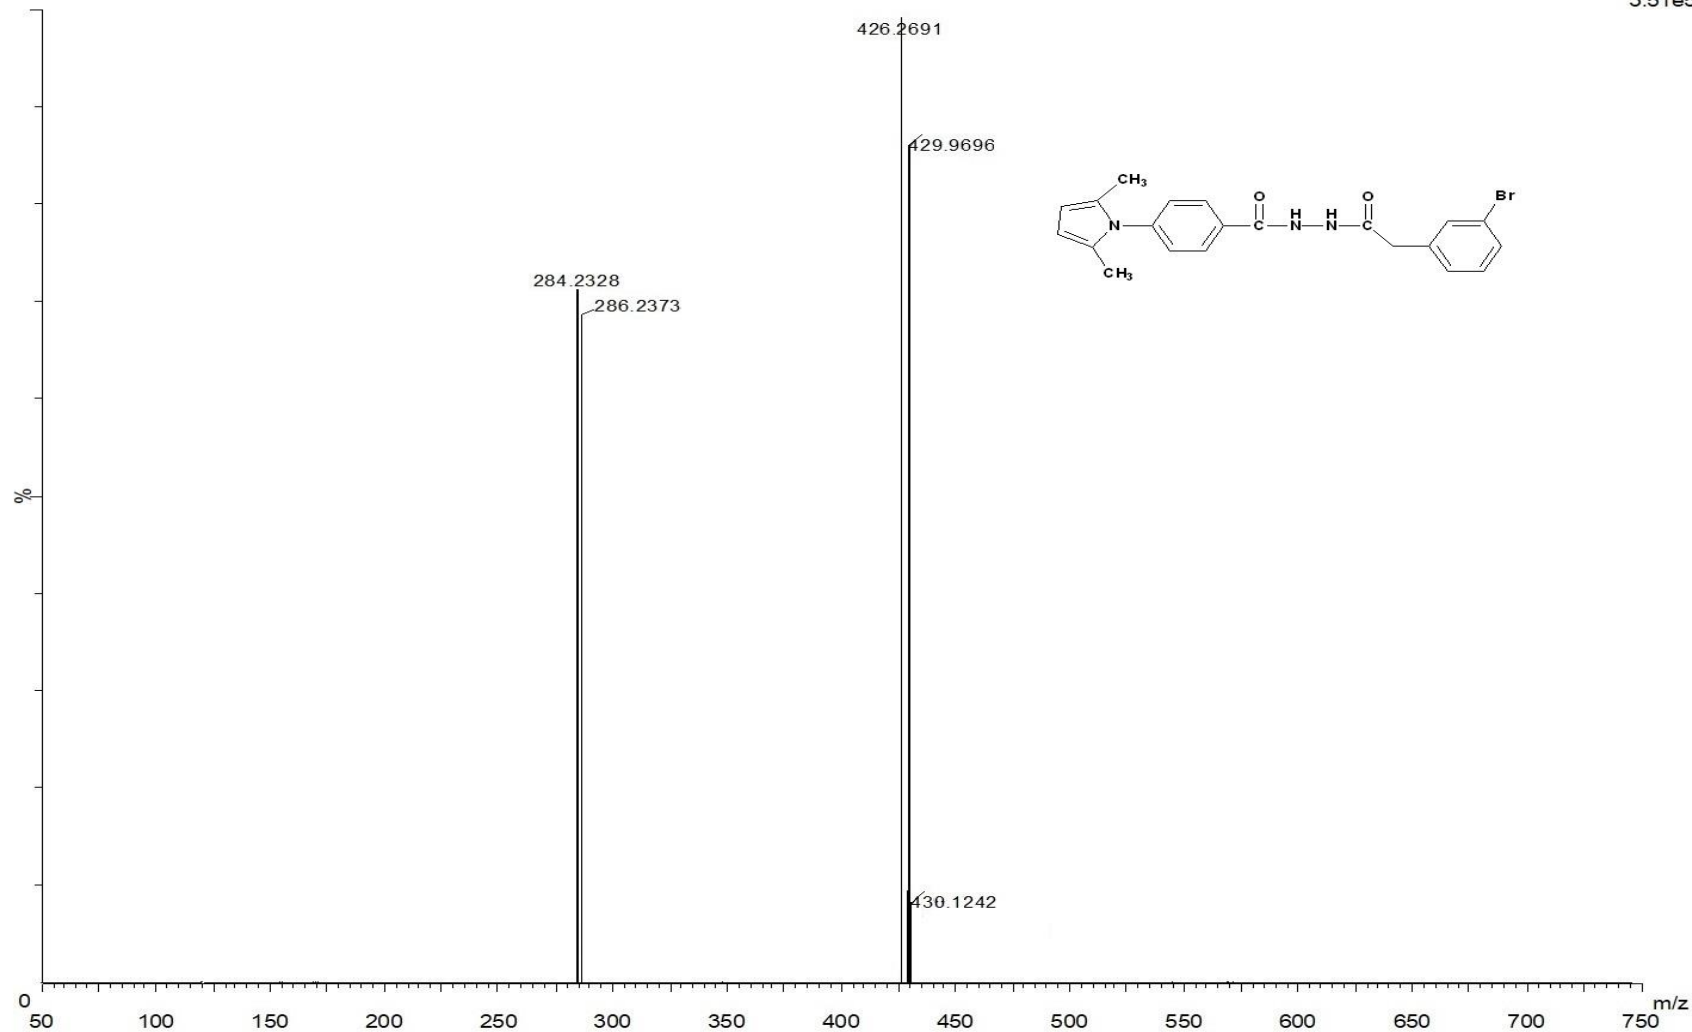

SPECTRUM NO: 53 (IR spectrum of Compound 5n)

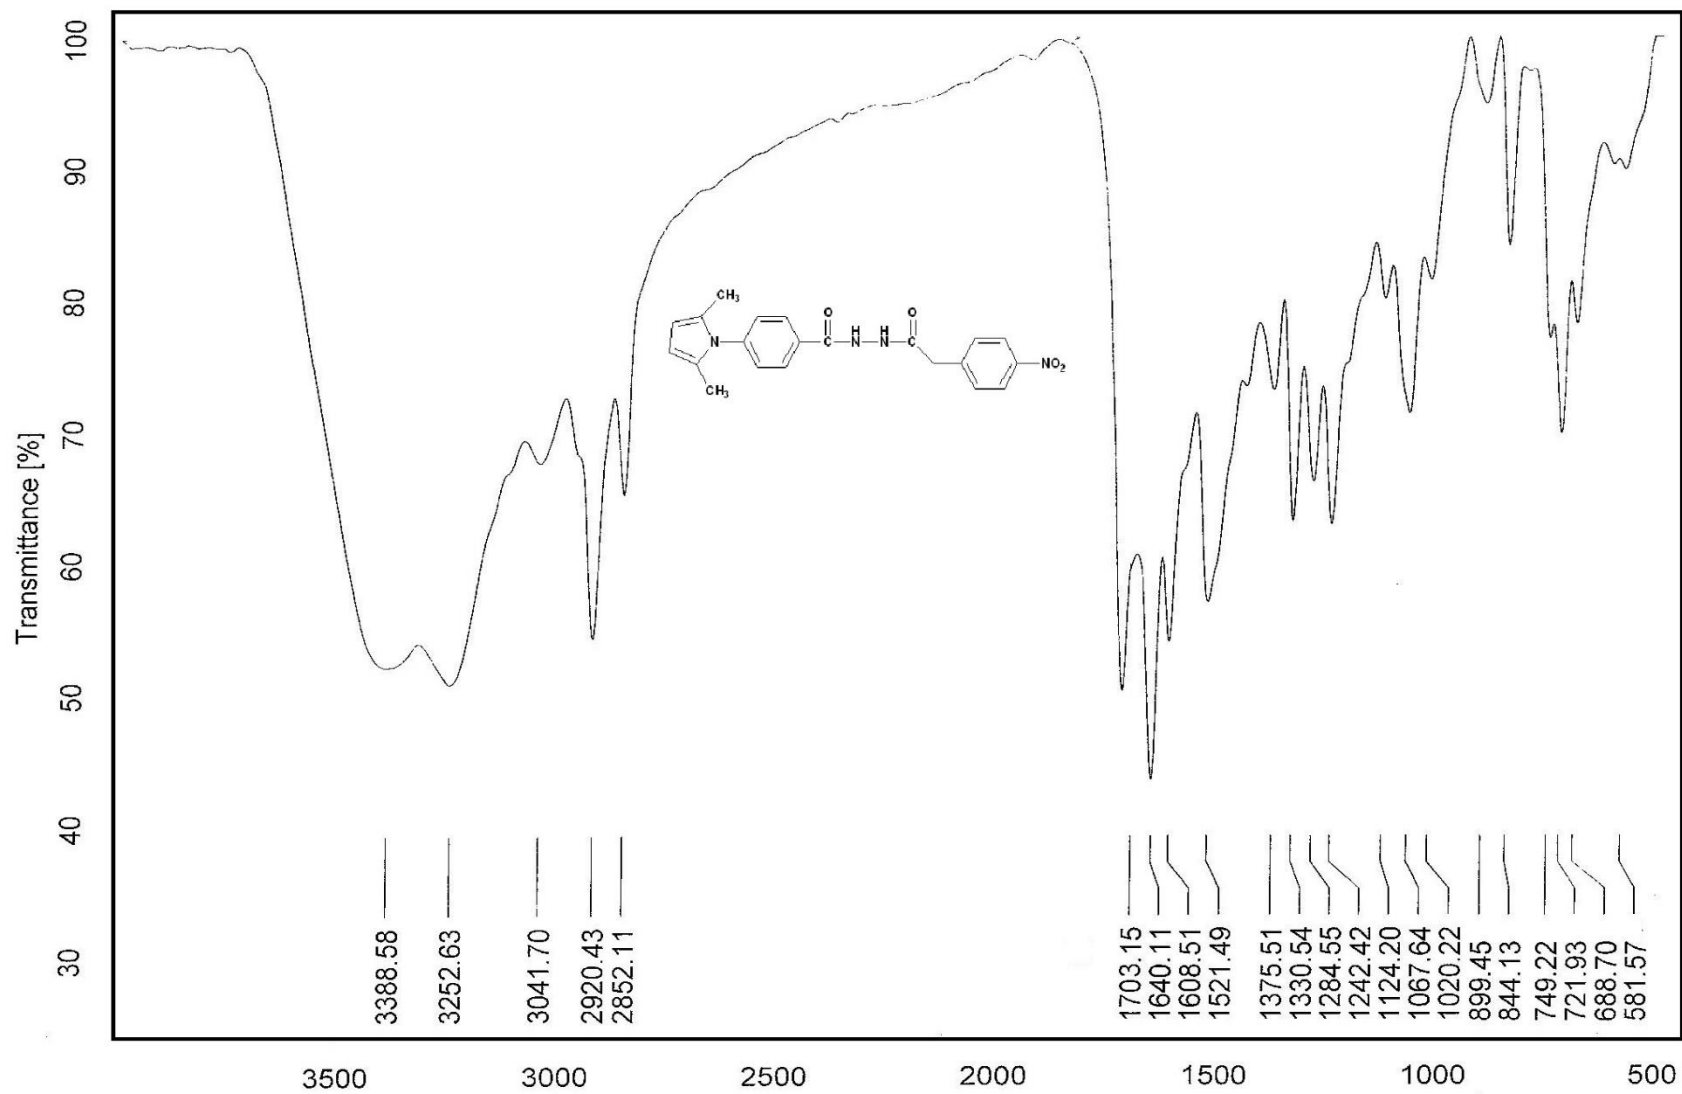

SPECTRUM NO: 54 (<sup>1</sup>H NMR spectrum of Compound 5n)

1H\_8scan DMSO {D:\Spectra} nmr 112

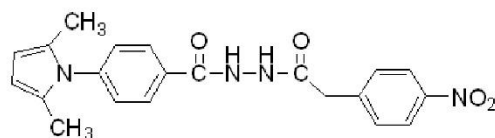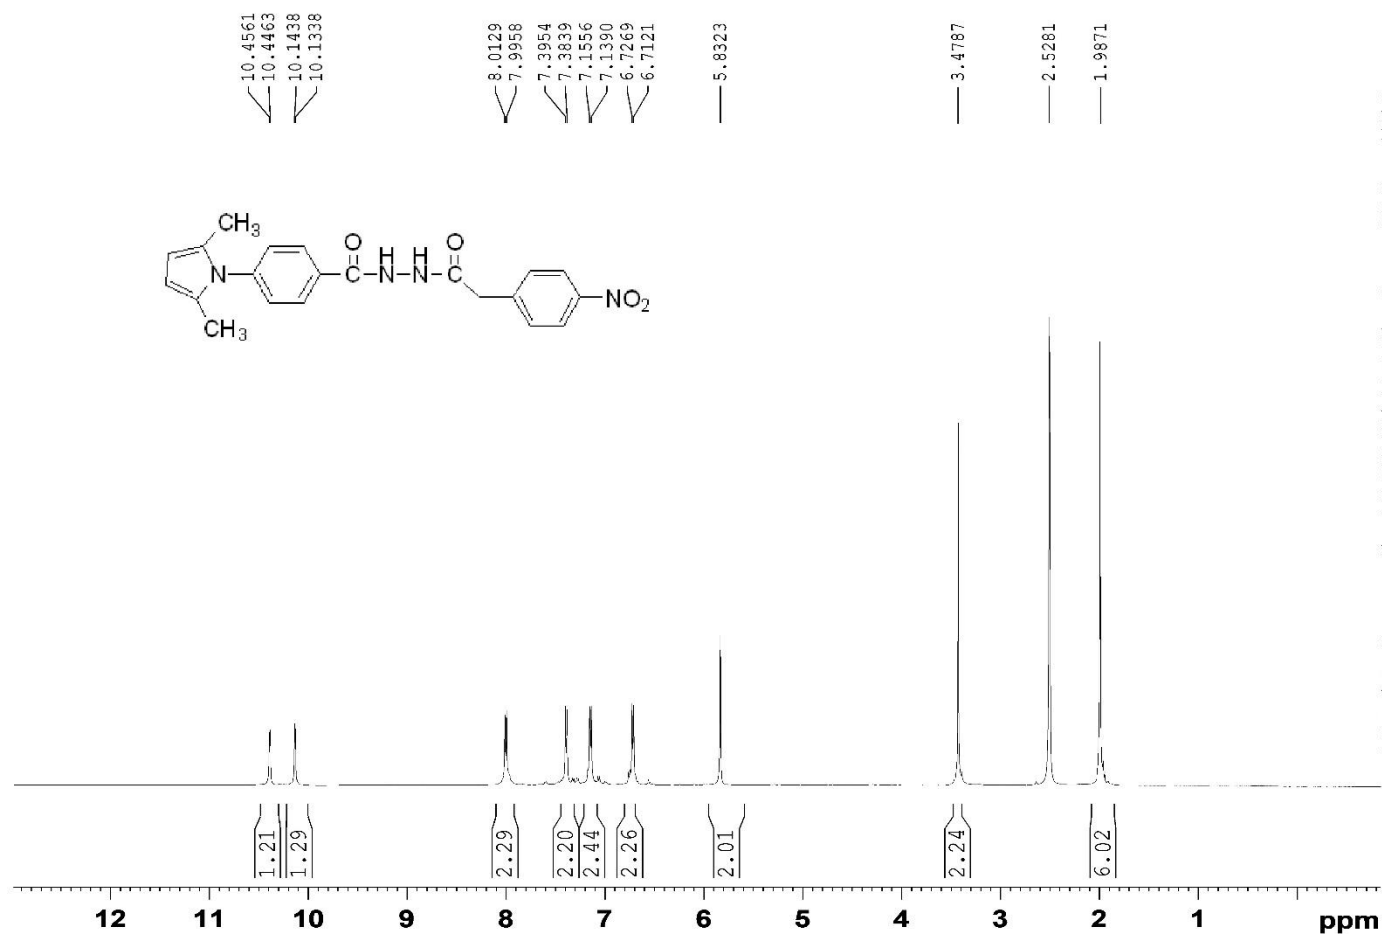

BRUKER  
AVANCE NEO  
500 MHz NMR  
SPECTROMETER  
SAIF, P.U.

Current Data Parameters  
NAME Mar03-2023-nmr  
EXPNO 12  
PROCNO 1

F2 - Acquisition Parameters  
Date\_ 20210803  
Time\_ 18.48 h  
INSTRUM Avance Neo 500  
PROBHD Z119470\_0333 (   
PULPROG zg30  
TD 65536  
SOLVENT DMSO  
NS 16  
DS 0  
SWH 14705.883 Hz  
FIDRES 0.448788 Hz  
AQ 2.2282240 sec  
RG 95.7854  
DW 34.000 usec  
DE 6.79 usec  
TE 300.1 K  
D1 1.00000000 sec  
TD0 1  
SF01 500.1730885 MHz  
NUC1 1H  
P0 3.33 usec  
P1 10.00 usec  
PLW1 20.93000031 W

F2 - Processing parameters  
SI 65536  
SF 500.1700000 MHz  
WDW EM  
SSB 0  
LB 0.30 Hz  
GB 0  
PC 1.00

SPECTRUM NO: 55 (<sup>13</sup>C NMR spectrum of Compound 5n)

4NO2-5N

C13CPD CDC13 {D:\Spectra} nmr 56

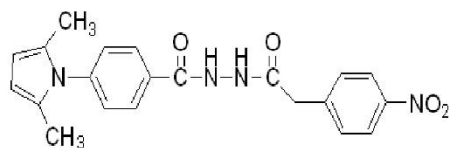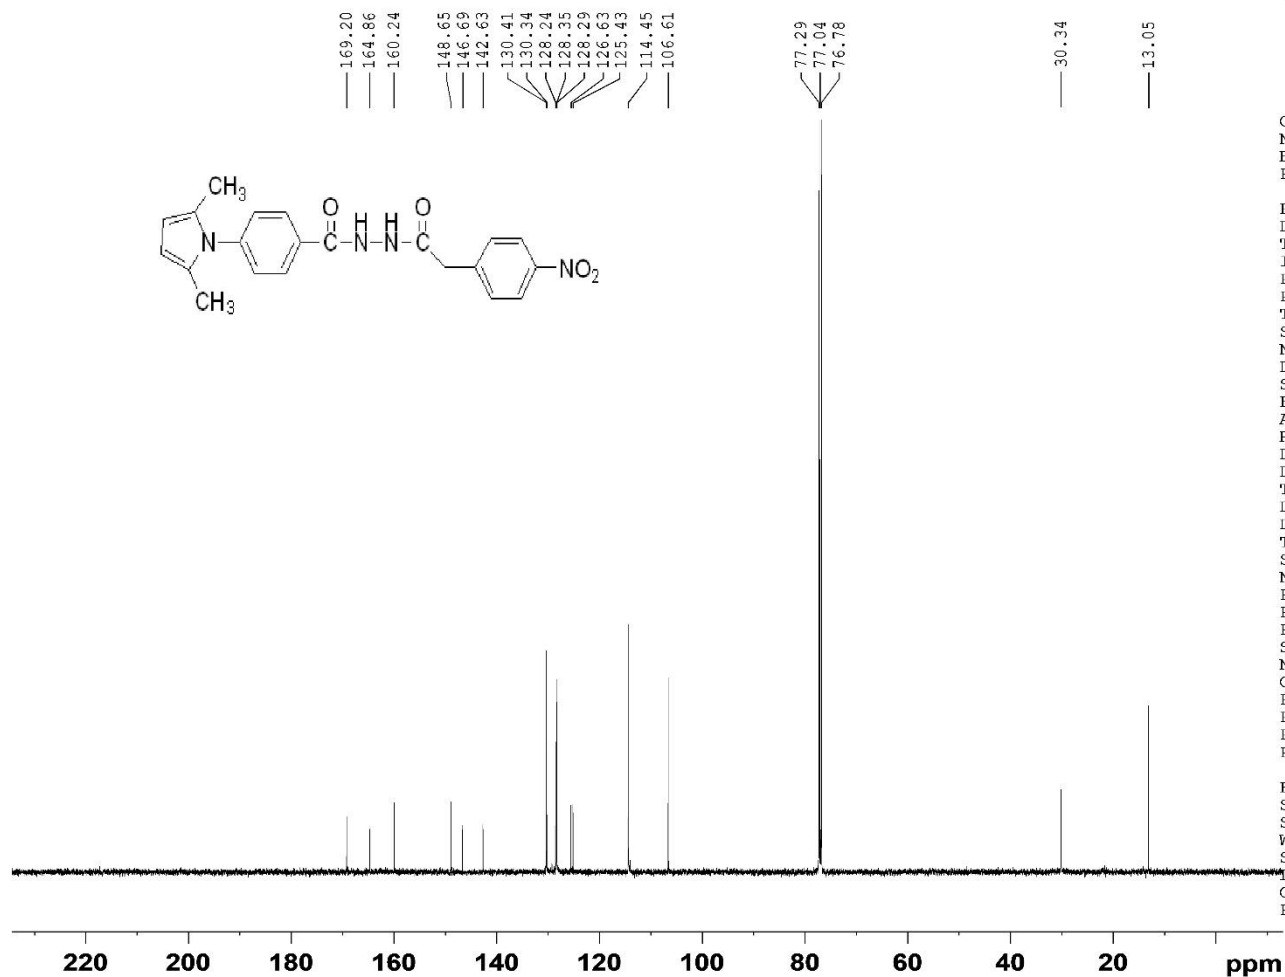

BRUKER

AVANCE NEO

500 MHz NMR SPECTROMETER

SAIF, PANJAB UNIVERSITY,  
CHANDIGARH

Current Data Parameters

NAME Mar30-2023  
EXPNO 04  
PROCNO 1

F2 - Acquisition Parameters

Date\_ 20230330  
Time\_ 18.06 h  
INSTRUM Avance Neo 500  
PROBHD Z119470\_0333 (   
PULPROG zgpg30  
TD 65536  
SOLVENT CDC13  
NS 512  
DS 4  
SWH 37037.035 Hz  
FIDRES 1.130281 Hz  
AQ 0.8847360 sec  
RG 101  
DW 13.500 usec  
DE 6.50 usec  
TE 300.1 K  
D1 2.0000000 sec  
D11 0.0300000 sec  
TD0 1  
SFO1 125.7804233 MHz  
NUC1 13C  
P0 3.33 usec  
P1 10.00 usec  
PLW1 83.14099884 W  
SFO2 500.1720007 MHz  
NUC2 1H  
CPDPRG[2] waltz65  
PCPD2 80.00 usec  
PLW2 20.93000031 W  
PLW12 0.32703000 W  
PLW13 0.16449000 W

F2 - Processing parameters

SI 32768  
SF 125.7678465 MHz  
WDW EM  
SSB 0  
LB 1.00 Hz  
GB 0  
PC 1.40

SPECTRUM NO: 56 (Mass spectrum of Compound 5n)

230104-3NO<sub>2</sub> 3N 80 (3.013)

1: TOF MS ES+  
1.34e6

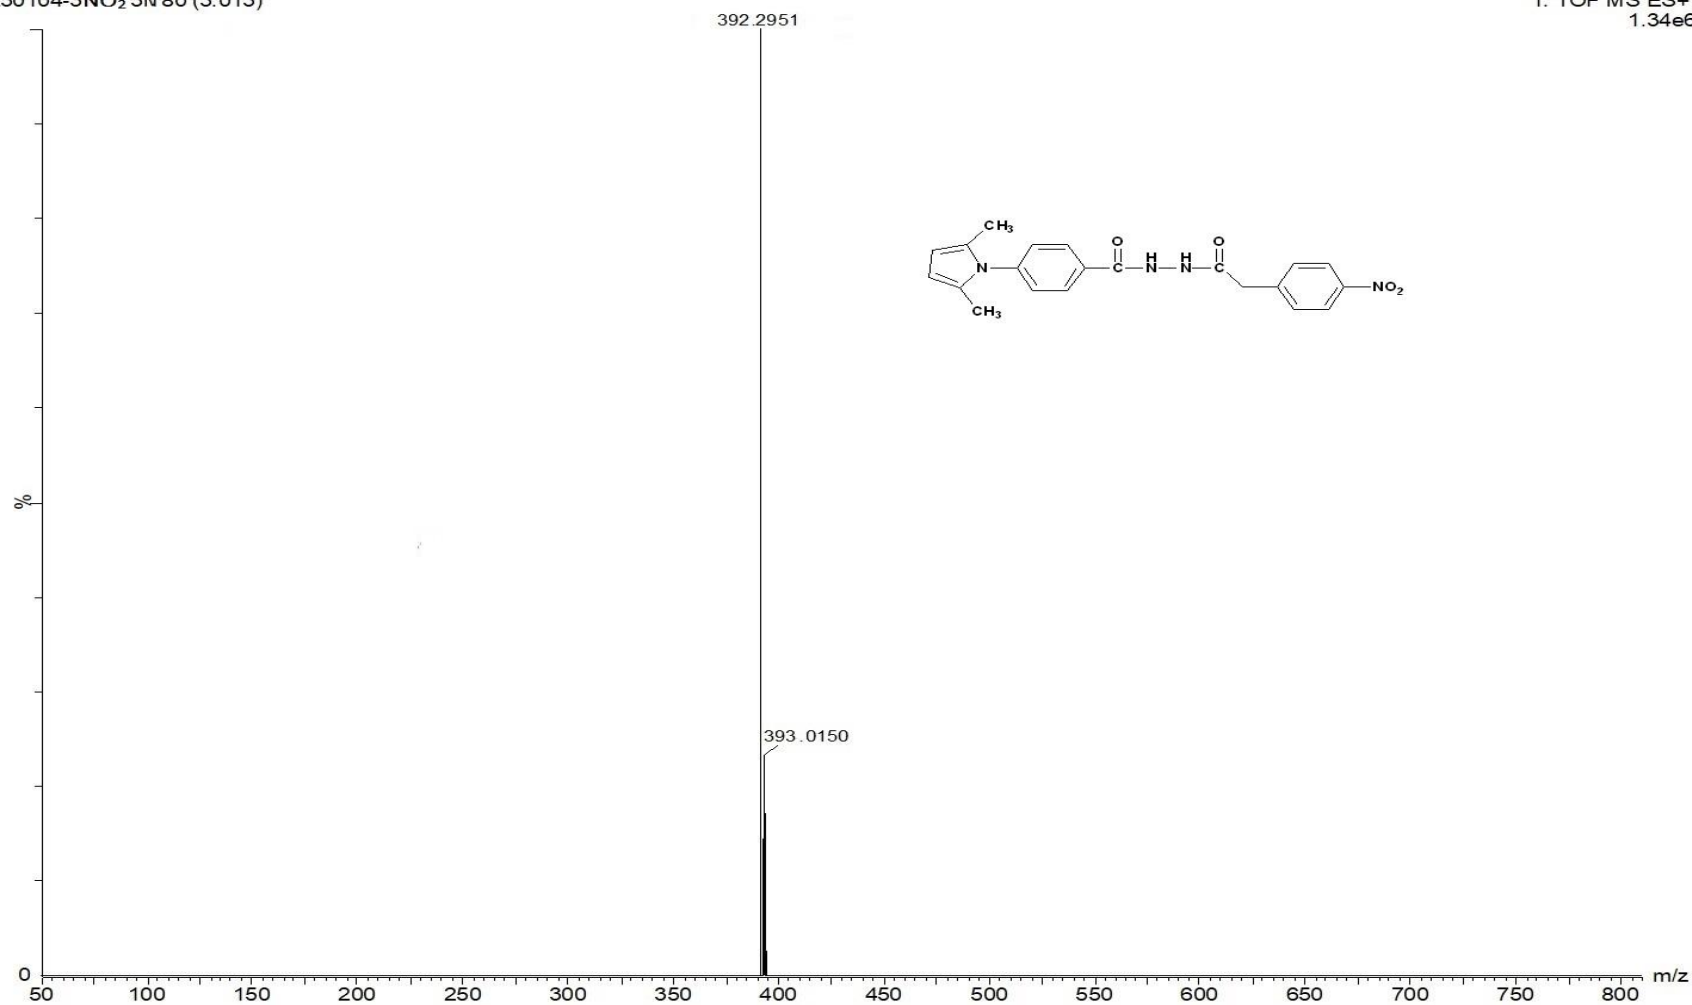

Supplement: s1 [file s1]
